# Supplementary material for: lnc-EPB41-Protein Interactions Associated with Congenital Pouch Colon
Source: Preprints.org preprint supplement (doi:10.20944/preprints201808.0534.v1), 2018-08-30
Supplement: Supplementary file 1 [file supplementary]

## Sheet: Results
	Results Overview
	#	Capillary label	Ti#1	Ti#2	Ti#3	Initial Ratio	Δ Ratio	Sample Brightness
	1	KIF13A	67.0514	78.345	90.743	0.213059	0.0356515	1876.74
	2	Affected NONHSAT002007	67.6072	81.4943	86.9537	0.213373	0.0340562	1839.52
	3	Unaffected NONHSAT002007	64.8136			0.204725	0.0287264	1716.66

## Sheet: Profiles_raw
	Signal:	Ratio 350 nm / 330 nm							Brightness @ 330 nm							Brightness @ 350 nm
	Capillary:	1	2	3					1	2	3	4	5	6		1	2	3	4	5	6
Time [s]	Temperature [°C]	KIF13A	Affected NONHSAT002007	Unaffected NONHSAT002007					KIF13A	Affected NONHSAT002007	Unaffected NONHSAT002007	Sample4	Sample5	Sample6		KIF13A	Affected NONHSAT002007	Unaffected NONHSAT002007	Sample4	Sample5	Sample6
71.2792	35.15	0.213096	0.213438	0.204734					1545.81	1514.02	1423.25					329.406	323.15	291.387
71.4803	35.269	0.213069	0.213546	0.204676					1543.24	1514.61	1426.18					328.815	323.439	291.905
71.6832	35.419	0.213061	0.212831	0.204301					1550.74	1512.03	1423.07					330.402	321.808	290.736
71.8859	35.538	0.212649	0.213367	0.205127					1546.15	1519.36	1425.49					328.788	324.183	292.408
72.0905	35.717	0.213037	0.213551	0.204855					1545.58	1509.97	1421.46					329.265	322.455	291.192
72.2915	35.836	0.213328	0.21363	0.205012					1542.91	1509.12	1418.63					329.147	322.393	290.836
72.4919	35.926	0.213484	0.212895	0.204911					1549.61	1520.23	1421.94					330.817	323.649	291.372
72.6945	36.015	0.213172	0.213083	0.204482					1542.95	1514.23	1425.64					328.914	322.657	291.519
72.8964	36.131	0.212889	0.213483	0.204997					1547.66	1516.51	1423.02					329.479	323.748	291.715
73.1005	36.22	0.213252	0.213076	0.205261					1545.02	1507.32	1419.25					329.478	321.174	291.316
73.3019	36.31	0.213384	0.213541	0.204779					1547.39	1515.1	1419.85					330.188	323.537	290.757
73.5039	36.399	0.213309	0.213625	0.205119					1547.54	1514.2	1421.42					330.104	323.471	291.561
73.7088	36.493	0.213047	0.212912	0.204852					1544.54	1512.24	1419.28					329.06	321.975	290.743
73.9107	36.642	0.21308	0.213786	0.205454					1551.85	1518.48	1419.76					330.668	324.629	291.694
74.1139	36.701	0.213285	0.213566	0.205275					1546.38	1509.98	1420.97					329.82	322.48	291.691
74.3159	36.847	0.213193	0.213602	0.204988					1543.72	1516.26	1421.13					329.111	323.876	291.314
74.5182	36.91	0.213339	0.213954	0.205327					1552.68	1515.5	1420.41					331.247	324.248	291.648
74.723	37.03	0.21275	0.213862	0.205294					1544.53	1513.59	1421.96					328.6	323.698	291.919
74.9251	37.119	0.213488	0.213878	0.205366					1549.9	1513.29	1421.92					330.886	323.661	292.014
75.1282	37.238	0.213796	0.213587	0.205738					1547.72	1512.85	1417.06					330.896	323.125	291.542
75.3301	37.298	0.213317	0.213595	0.205059					1545.77	1518.34	1422.05					329.74	324.31	291.605
75.5324	37.418	0.214217	0.213975	0.205462					1542.15	1507.25	1415.13					330.355	322.514	290.756
75.7371	37.503	0.213724	0.214025	0.205367					1542.48	1510.97	1414.44					329.665	323.385	290.479
75.939	37.626	0.214381	0.213774	0.205655					1547.4	1516.87	1419.83					331.734	324.266	291.995
76.1417	37.716	0.21375	0.213667	0.205758					1539.43	1514.57	1418.06					329.052	323.613	291.777
76.3438	37.806	0.213779	0.214257	0.205594					1541.26	1512.55	1423.82					329.489	324.074	292.728
76.5461	37.865	0.214071	0.213882	0.205481					1544.14	1507.38	1417.17					330.556	322.401	291.201
76.7509	38.018	0.213881	0.213738	0.205984					1541.49	1519.75	1417.15					329.694	324.828	291.91
76.9528	38.134	0.21405	0.214537	0.205996					1545.44	1512.14	1417.43					330.802	324.41	291.984
77.155	38.223	0.214234	0.214361	0.206084					1546.09	1511.19	1418.59					331.225	323.939	292.349
77.357	38.313	0.214119	0.214277	0.205878					1540.12	1513.73	1421.37					329.77	324.359	292.63
77.5597	38.373	0.214402	0.214357	0.205851					1542.56	1506.15	1414.05					330.728	322.855	291.084
77.7644	38.522	0.213783	0.214171	0.20648					1547.14	1517.63	1414.97					330.751	325.033	292.164
77.9662	38.641	0.214381	0.214186	0.206373					1545.91	1510.14	1419.77					331.414	323.451	293.002
78.1674	38.731	0.214086	0.214412	0.206069					1546.63	1518.37	1421.8					331.112	325.556	292.989
78.3696	38.791	0.214133	0.214074	0.206413					1544.65	1511.77	1417.66					330.762	323.63	292.624
78.5724	38.91	0.214779	0.214718	0.206102					1539.22	1508.22	1417.52					330.593	323.842	292.155
78.7764	39.03	0.214152	0.214749	0.205877					1544.24	1512.06	1416.24					330.701	324.714	291.572
78.9781	39.119	0.214205	0.214446	0.205728					1540.59	1510.96	1416.87					330.004	324.02	291.491
79.1789	39.239	0.214083	0.214672	0.206458					1544.24	1512.36	1416.36					330.595	324.661	292.419
79.381	39.328	0.2147	0.214581	0.20648					1542.35	1512.46	1414.63					331.144	324.546	292.092
79.5839	39.418	0.213808	0.214267	0.206964					1541.24	1504.66	1415.2					329.531	322.4	292.896
79.788	39.507	0.213918	0.214721	0.20637					1552.58	1515.61	1412.53					332.126	325.432	291.503
79.9899	39.597	0.214609	0.21437	0.20633					1535.8	1505.66	1414.35					329.596	322.769	291.824
80.1916	39.716	0.215015	0.21458	0.20677					1541.57	1506.47	1412.76					331.461	323.257	292.116
80.394	39.866	0.214426	0.214733	0.206933					1545.13	1511.41	1412.35					331.316	324.549	292.263
80.5969	39.955	0.214848	0.214997	0.207137					1539.34	1509.72	1414.86					330.724	324.586	293.07
80.8008	40.015	0.214755	0.215179	0.20714					1543.68	1508.18	1414.43					331.513	324.527	292.984
81.0026	40.135	0.21429	0.214856	0.20693					1543.32	1509.55	1414.34					330.717	324.335	292.669
81.2038	40.254	0.2147	0.21556	0.206841					1546.33	1513.45	1417.78					331.998	326.24	293.256
81.4064	40.344	0.214484	0.215211	0.207101					1538.2	1508.1	1412.84					329.92	324.56	292.602
81.6092	40.433	0.214915	0.214883	0.207415					1541.25	1508.1	1413.02					331.238	324.065	293.081
81.8128	40.493	0.215008	0.214993	0.206703					1543.81	1508.49	1413.28					331.933	324.315	292.129
82.0148	40.642	0.214883	0.215479	0.206719					1534.97	1509.05	1413.13					329.838	325.168	292.122
82.2164	40.728	0.215321	0.215418	0.20739					1542.92	1508.44	1413.43					332.224	324.945	293.131
82.4202	40.848	0.215066	0.215542	0.207407					1541.25	1506.87	1412.32					331.47	324.795	292.924
82.6225	40.911	0.21504	0.215662	0.207137					1539.51	1509.93	1413.27					331.057	325.636	292.741
82.8262	41.061	0.214916	0.215274	0.207429					1538.83	1506.97	1411.24					330.719	324.412	292.731
83.0285	41.15	0.215438	0.215314	0.207175					1537.85	1508.52	1412.39					331.311	324.806	292.611
83.2307	41.24	0.215053	0.215737	0.207161					1547.41	1512.99	1408.09					332.775	326.408	291.701
83.4339	41.33	0.214973	0.215086	0.207562					1536.95	1508.19	1409.99					330.403	324.391	292.66
83.6375	41.449	0.215182	0.215145	0.207551					1544.36	1510.26	1407.41					332.318	324.924	292.109
83.841	41.539	0.215069	0.215898	0.207828					1540.52	1505.79	1410.1					331.318	325.097	293.058
84.0427	41.625	0.215698	0.216097	0.207775					1537.98	1511.91	1412.47					331.74	326.718	293.475
84.2446	41.748	0.215907	0.215418	0.207368					1536.7	1507.76	1412.49					331.784	324.8	292.905
84.4483	41.838	0.215452	0.215748	0.207942					1535.26	1508.18	1408.29					330.775	325.386	292.843
84.6515	41.957	0.215269	0.215635	0.207413					1546.31	1507.81	1406.57					332.872	325.136	291.741
84.8553	42.047	0.215127	0.215752	0.208357					1537.71	1506.77	1407.14					330.803	325.088	293.187
85.0568	42.137	0.216035	0.21628	0.207944					1542.68	1508.06	1408.37					333.273	326.164	292.863
85.2589	42.252	0.215478	0.215978	0.208203					1540.2	1508.21	1408.54					331.88	325.741	293.261
85.4615	42.346	0.215363	0.215675	0.208001					1537.05	1502.09	1406.2					331.024	323.963	292.491
85.6641	42.436	0.21542	0.216416	0.207611					1546.13	1509.01	1409.52					333.066	326.574	292.633
85.869	42.555	0.215566	0.216204	0.208764					1533.44	1502.57	1406.02					330.557	324.861	293.527
86.0705	42.675	0.215757	0.216081	0.208207					1543.2	1511.33	1408.24					332.956	326.571	293.205
86.2729	42.764	0.215764	0.215958	0.208343					1538.44	1508.38	1406.88					331.94	325.748	293.114
86.4751	42.884	0.21612	0.216219	0.208615					1535.3	1505.44	1406.39					331.81	325.505	293.395
86.6777	43.003	0.216017	0.215717	0.20819					1540.79	1504.43	1403.19					332.837	324.532	292.13
86.8816	43.033	0.215681	0.215882	0.208502					1532.35	1499.06	1405.13					330.499	323.619	292.972
87.0833	43.149	0.215693	0.216058	0.207953					1544.43	1510.26	1407.68					333.123	326.304	292.731
87.2853	43.269	0.216084	0.216628	0.207946					1531.72	1504.44	1406.04					330.981	325.905	292.381
87.4901	43.362	0.216152	0.216197	0.208342					1532.27	1502.93	1404.8					331.203	324.929	292.679
87.6929	43.482	0.215711	0.216635	0.208812					1539.7	1502.17	1399.32					332.13	325.422	292.195
87.8965	43.572	0.215947	0.216639	0.208499					1527.11	1504.11	1404.13					329.775	325.849	292.759
88.0981	43.661	0.216423	0.216965	0.209024					1542.11	1506.87	1402.94					333.748	326.937	293.249
88.3001	43.747	0.216624	0.216212	0.208947					1534.75	1506.73	1406.33					332.465	325.774	293.849
88.5047	43.901	0.21667	0.215865	0.209205					1534.23	1510.35	1405.34					332.422	326.033	294.005
88.7076	43.99	0.216576	0.21626	0.208417					1536.53	1504.25	1403.35					332.777	325.309	292.481
88.9116	44.08	0.216135	0.216345	0.20866					1532.7	1501.35	1402.54					331.269	324.811	292.654
89.1129	44.166	0.216273	0.216254	0.209162					1545.36	1512	1403.79					334.22	326.975	293.62
89.3149	44.26	0.216266	0.217345	0.208864					1526.59	1501.78	1403.59					330.15	326.404	293.159
89.5196	44.349	0.216182	0.216973	0.208319					1538.64	1503.88	1401.83					332.626	326.301	292.028
89.7225	44.499	0.216616	0.217115	0.208741					1536.4	1506.71	1405.3					332.81	327.13	293.343
89.9265	44.618	0.216586	0.217224	0.209453					1534.31	1505.05	1401.21					332.309	326.933	293.488
90.1282	44.708	0.216241	0.216691	0.20921					1538.28	1500.8	1399.4					332.64	325.21	292.768
90.3305	44.798	0.216747	0.216932	0.209345					1535.2	1506.84	1401.89					332.75	326.882	293.479
90.5355	44.888	0.21697	0.217086	0.20965					1540.43	1501.21	1398.12					334.228	325.891	293.115
90.7376	44.977	0.216696	0.216146	0.209519					1531.88	1500.65	1401.72					331.952	324.359	293.688
90.9401	45.097	0.21684	0.217246	0.209506					1537.76	1505.64	1400.6					333.449	327.094	293.434
91.142	45.153	0.216432	0.216939	0.209413					1538.45	1507.4	1399.61					332.97	327.015	293.096
91.3448	45.247	0.217132	0.216793	0.209116					1531.33	1502.25	1399.9					332.501	325.677	292.741
91.5509	45.396	0.217432	0.217547	0.209287					1536.38	1496.55	1393.74					334.058	325.571	291.693
91.7534	45.512	0.216823	0.217189	0.209103					1530.3	1502.1	1399.25					331.805	326.241	292.588
91.9569	45.606	0.216634	0.217397	0.209806					1543.94	1509.96	1400.64					334.47	328.26	293.862
92.1594	45.695	0.217131	0.216951	0.209633					1526.97	1501.17	1397.55					331.553	325.681	292.972
92.3625	45.785	0.217262	0.217251	0.209587					1531.27	1502.32	1399.26					332.687	326.382	293.267
92.5682	45.905	0.216733	0.217019	0.209633					1537.3	1501.3	1395.58					333.183	325.812	292.559
92.7706	46.055	0.216831	0.217379	0.209632					1525.17	1502.52	1399.29					330.704	326.617	293.337
92.9739	46.144	0.217365	0.217419	0.209787					1540.53	1504.98	1395.61					334.857	327.212	292.781
93.1762	46.204	0.217069	0.216996	0.210351					1525.74	1504.57	1397.44					331.192	326.486	293.952
93.3793	46.294	0.217313	0.217473	0.210103					1529.88	1498.26	1393.86					332.463	325.831	292.854
93.5849	46.444	0.217228	0.21764	0.210504					1538.15	1501.5	1393.98					334.129	326.786	293.438
93.7874	46.503	0.217418	0.217324	0.210415					1529.2	1500.91	1393.48					332.476	326.185	293.21
93.9909	46.653	0.216981	0.217442	0.210485					1538.79	1501.71	1393					333.887	326.536	293.206
94.1934	46.713	0.217752	0.217835	0.210642					1528	1503.03	1394.82					332.725	327.411	293.807
94.3965	46.833	0.217708	0.217894	0.210451					1534	1500.88	1393.6					333.965	327.032	293.284
94.6015	46.923	0.217577	0.218029	0.210025					1533.09	1498.02	1395.25					333.565	326.612	293.038
94.8037	47.042	0.217732	0.218101	0.210586					1529.87	1502.13	1396.59					333.103	327.614	294.102
95.0064	47.132	0.217381	0.21753	0.210376					1539.08	1501.86	1391.71					334.566	326.701	292.782
95.2091	47.222	0.217804	0.217399	0.210796					1521.32	1503.2	1395.13					331.35	326.794	294.088
95.4126	47.312	0.217576	0.217298	0.210191					1539.6	1503.35	1392.63					334.979	326.675	292.72
95.6179	47.402	0.217467	0.218288	0.210233					1532.11	1500.22	1396.21					333.184	327.479	293.529
95.8205	47.551	0.218221	0.217711	0.210493					1527.49	1500.63	1393.54					333.33	326.703	293.331
96.0231	47.641	0.218019	0.217824	0.210782					1538.86	1504.11	1391.86					335.501	327.63	293.378
96.2256	47.731	0.217673	0.218239	0.210994					1528.51	1504.14	1393.85					332.716	328.262	294.094
96.4283	47.851	0.217735	0.218559	0.211165					1534.55	1504.04	1392.06					334.125	328.721	293.954
96.633	47.911	0.21793	0.217683	0.210376					1528.89	1498.28	1395.25					333.19	326.151	293.527
96.8356	48.03	0.217979	0.21772	0.210948					1535.41	1501.38	1390.54					334.687	326.88	293.331
97.0378	48.116	0.218251	0.218223	0.210865					1538.07	1498.07	1389.86					335.686	326.914	293.074
97.2408	48.24	0.218304	0.218477	0.210619					1524.88	1499.64	1392.53					332.888	327.638	293.293
97.4437	48.33	0.218163	0.217875	0.210788					1535.46	1495.9	1386.38					334.98	325.92	292.231
97.6486	48.45	0.218077	0.217866	0.21096					1526.22	1499.43	1390.95					332.834	326.675	293.434
97.851	48.54	0.218136	0.21838	0.210886					1535.33	1503.51	1388.63					334.911	328.336	292.843
98.053	48.659	0.21835	0.218476	0.211204					1526.03	1498.45	1389.81					333.209	327.376	293.534
98.2554	48.749	0.217453	0.218875	0.211234					1533.17	1500.92	1388.48					333.392	328.513	293.294
98.4585	48.839	0.21799	0.218697	0.211548					1533.67	1499.97	1384.55					334.323	328.038	292.898
98.6633	48.929	0.218025	0.218853	0.210923					1525.06	1497.41	1389.62					332.502	327.714	293.103
98.8662	49.049	0.21868	0.218841	0.211583					1535.2	1498.64	1386.17					335.718	327.963	293.291
99.0684	49.168	0.218291	0.218216	0.211018					1521.27	1502.77	1388.59					332.081	327.928	293.019
99.2713	49.288	0.217986	0.218852	0.211421					1527.34	1497.52	1387.36					332.94	327.736	293.315
99.4749	49.378	0.21849	0.21903	0.211777					1530.72	1498.71	1387.78					334.447	328.262	293.9
99.6789	49.468	0.218795	0.218789	0.211342					1526.87	1500.38	1387.97					334.071	328.267	293.337
99.8811	49.528	0.218472	0.218991	0.212137					1539.47	1501.68	1386.58					336.331	328.854	294.145
100.083	49.648	0.218294	0.218782	0.211454					1518.12	1499.96	1390.86					331.397	328.163	294.103
100.287	49.768	0.218545	0.219423	0.211571					1532.8	1495.52	1385.58					334.986	328.15	293.148
100.49	49.858	0.219127	0.218864	0.211525					1526.82	1497.64	1384.75					334.567	327.779	292.91
100.694	49.977	0.2187	0.219327	0.211915					1520.87	1498.62	1388.19					332.614	328.689	294.179
100.897	50.101	0.219171	0.219144	0.211685					1533.93	1497.63	1382.15					336.194	328.196	292.582
101.099	50.187	0.219044	0.219572	0.212256					1520.47	1503.73	1387.72					333.049	330.176	294.551
101.303	50.277	0.219362	0.219345	0.212571					1535.2	1494.55	1383.67					336.763	327.823	294.129
101.506	50.367	0.218769	0.218983	0.211846					1528.23	1498.87	1386.06					334.329	328.226	293.631
101.71	50.427	0.219499	0.219624	0.212097					1526.63	1495	1381.21					335.093	328.338	292.95
101.913	50.547	0.219394	0.218952	0.212758					1537.26	1499.27	1381.35					337.267	328.268	293.893
102.115	50.667	0.218592	0.219321	0.212132					1525.12	1499.82	1383.15					333.38	328.943	293.411
102.319	50.787	0.219438	0.219173	0.211954					1532.14	1496.08	1380.59					336.209	327.9	292.622
102.523	50.907	0.218478	0.219611	0.211934					1527.66	1491.04	1381.32					333.76	327.448	292.748
102.727	50.997	0.219443	0.219093	0.212477					1526.86	1495.64	1380.39					335.058	327.684	293.302
102.929	51.086	0.218373	0.219845	0.212057					1529.29	1496.6	1379.83					333.956	329.02	292.602
103.131	51.146	0.219347	0.219639	0.212104					1527.6	1498.32	1381.64					335.075	329.09	293.052
103.335	51.266	0.219431	0.219089	0.212326					1536.29	1493.72	1377.06					337.109	327.257	292.385
103.539	51.356	0.219027	0.219039	0.212174					1526.14	1495.35	1377.96					334.267	327.539	292.368
103.744	51.506	0.219578	0.219438	0.212765					1525.05	1493.75	1376.32					334.869	327.786	292.832
103.946	51.596	0.219458	0.219449	0.212775					1528.87	1495.15	1378.04					335.523	328.11	293.213
104.149	51.712	0.219339	0.218918	0.212607					1531.08	1504.74	1378.54					335.826	329.415	293.088
104.35	51.776	0.219565	0.219466	0.212429					1528.01	1493.69	1379.95					335.498	327.814	293.142
104.554	51.896	0.219752	0.219861	0.212993					1517.45	1500.07	1378.34					333.462	329.806	293.577
104.759	52.016	0.219556	0.21991	0.212784					1523.48	1489.61	1376.29					334.489	327.58	292.854
104.96	52.076	0.219729	0.219737	0.213218					1524.62	1496.52	1379.79					335.003	328.84	294.196
105.163	52.196	0.219799	0.220375	0.21284					1522.54	1498.36	1380.31					334.652	330.202	293.784
105.368	52.285	0.219529	0.219944	0.212898					1525.04	1492.93	1375.9					334.79	328.361	292.925
105.572	52.376	0.219694	0.219753	0.213076					1523.42	1498.25	1376.9					334.687	329.244	293.384
105.776	52.555	0.219874	0.219723	0.213132					1525.61	1499.6	1376.23					335.442	329.497	293.318
105.978	52.645	0.219503	0.219616	0.213647					1519.07	1494.75	1377.38					333.441	328.27	294.272
106.18	52.735	0.2194	0.220501	0.212525					1532.17	1494.69	1377.09					336.157	329.581	292.667
106.384	52.825	0.220011	0.220005	0.213214					1521.92	1496.06	1376.14					334.839	329.142	293.413
106.587	52.945	0.219434	0.220303	0.213675					1522.32	1494.57	1373.44					334.05	329.259	293.469
106.791	52.975	0.21994	0.220722	0.213513					1527.26	1493.66	1372.84					335.905	329.684	293.119
106.993	53.125	0.219859	0.220304	0.213454					1523.56	1497.04	1376.25					334.969	329.805	293.766
107.195	53.219	0.219748	0.220203	0.212818					1522.84	1492.7	1373.01					334.641	328.697	292.202
107.4	53.275	0.220077	0.220545	0.213489					1521.97	1488.71	1369.6					334.95	328.328	292.394
107.603	53.395	0.21982	0.220178	0.213571					1527.41	1496.12	1373.14					335.755	329.412	293.263
107.807	53.485	0.220555	0.220678	0.213365					1528.08	1492.37	1368.3					337.025	329.332	291.947
108.01	53.605	0.219717	0.220369	0.213361					1520.5	1494.19	1373.04					334.078	329.272	292.954
108.212	53.725	0.220728	0.22049	0.213752					1532.61	1493.62	1371.89					338.289	329.329	293.245
108.416	53.845	0.220058	0.220061	0.213809					1522.37	1489.57	1369.81					335.009	327.797	292.877
108.619	53.935	0.219849	0.220452	0.213607					1525.31	1495.45	1371.9					335.338	329.675	293.047
108.823	54.025	0.220225	0.220644	0.214538					1522.22	1491.25	1366.95					335.23	329.034	293.262
109.025	54.115	0.220295	0.22088	0.213942					1515.87	1493.93	1369.88					333.939	329.979	293.075
109.228	54.205	0.220274	0.220385	0.213585					1528.29	1487.98	1368.72					336.642	327.927	292.339
109.435	54.355	0.220243	0.220444	0.214005					1520.5	1492.4	1372.61					334.88	328.99	293.746
109.638	54.445	0.220684	0.220522	0.214129					1521.87	1491.1	1368.32					335.852	328.821	292.996
109.842	54.565	0.220869	0.220788	0.21407					1523.53	1491.76	1369.26					336.502	329.362	293.116
110.045	54.689	0.220497	0.221119	0.213807					1519.22	1493.46	1368.46					334.984	330.233	292.586
110.248	54.745	0.221194	0.220244	0.214178					1522.2	1487.93	1368.06					336.702	327.706	293.009
110.454	54.806	0.220732	0.220801	0.213749					1523.76	1491.95	1366.71					336.343	329.425	292.132
110.657	54.896	0.220834	0.221071	0.214596					1520.38	1485.94	1364.76					335.752	328.499	292.873
110.861	55.016	0.220666	0.22092	0.214253					1521.86	1491	1365.97					335.823	329.391	292.662
111.064	55.136	0.220783	0.22093	0.214614					1515.3	1494.53	1369.59					334.553	330.187	293.933
111.268	55.256	0.2206	0.22148	0.214451					1520.14	1486.18	1363.52					335.343	329.159	292.407
111.473	55.406	0.22092	0.220722	0.214429					1525.82	1491.31	1363.98					337.084	329.165	292.478
111.676	55.466	0.221387	0.221088	0.214401					1520.72	1487.48	1363.2					336.667	328.864	292.272
111.88	55.526	0.221038	0.221226	0.214669					1519.6	1488.67	1364.19					335.889	329.332	292.848
112.083	55.616	0.221019	0.221305	0.214897					1529.19	1493.42	1362.93					337.979	330.5	292.89
112.286	55.766	0.221251	0.220844	0.21458					1515.21	1483.95	1361.26					335.242	327.722	292.1
112.492	55.882	0.221083	0.221119	0.21481					1519.43	1488.32	1362.62					335.921	329.095	292.705
112.695	55.946	0.220887	0.2215	0.214456					1518.58	1485.96	1361.78					335.434	329.142	292.044
112.899	56.066	0.22152	0.221435	0.214446					1519.05	1493.66	1367.35					336.5	330.749	293.223
113.102	56.16	0.221085	0.221628	0.215246					1522.43	1491.71	1363.49					336.586	330.604	293.486
113.306	56.276	0.220805	0.221331	0.215107					1519.67	1487.47	1360.81					335.55	329.223	292.719
113.512	56.366	0.220782	0.22144	0.214653					1524.51	1494.92	1359.86					336.584	331.034	291.899
113.714	56.517	0.221802	0.221879	0.214539					1517.84	1486.15	1362.22					336.659	329.746	292.248
113.918	56.607	0.221341	0.221545	0.215153					1518.27	1488.34	1362.02					336.055	329.734	293.042
114.12	56.667	0.221139	0.221538	0.214692					1523.51	1483.76	1359.35					336.906	328.708	291.843
114.324	56.757	0.221347	0.221623	0.214648					1511.77	1489.9	1362.93					334.625	330.195	292.55
114.53	56.907	0.221316	0.222242	0.214744					1518.62	1488.93	1359.61					336.094	330.902	291.969
114.732	56.967	0.221577	0.222058	0.215087					1519.01	1487.2	1360.15					336.579	330.246	292.552
114.935	57.117	0.221296	0.222228	0.215546					1517.38	1493.23	1360.68					335.79	331.837	293.29
115.138	57.207	0.2217	0.221546	0.215885					1513.09	1489.35	1359.69					335.452	329.959	293.535
115.341	57.297	0.22165	0.221762	0.215579					1519.09	1491.79	1355.93					336.706	330.823	292.31
115.546	57.387	0.221026	0.221786	0.215313					1520.3	1486.9	1355.57					336.026	329.773	291.873
115.749	57.508	0.221576	0.221345	0.216136					1517.14	1492.43	1359.71					336.161	330.342	293.882
115.951	57.598	0.221981	0.222118	0.215398					1518.36	1489.4	1357.47					337.046	330.823	292.396
116.154	57.688	0.22215	0.222297	0.215375					1517.43	1486.98	1355.79					337.097	330.552	292.004
116.358	57.808	0.222051	0.221891	0.215517					1523.23	1489.38	1357.86					338.235	330.479	292.642
116.563	57.898	0.221952	0.221962	0.215371					1518.52	1486.06	1352.21					337.038	329.849	291.226
116.766	57.988	0.221687	0.222204	0.215291					1514.81	1486.66	1354.78					335.814	330.342	291.672
116.969	58.108	0.221738	0.22206	0.215918					1511.76	1490.52	1357.92					335.216	330.986	293.199
117.172	58.229	0.222277	0.22255	0.215416					1516.25	1482.77	1355.65					337.028	329.99	292.028
117.375	58.289	0.221983	0.221824	0.215815					1521.14	1488.69	1355.57					337.668	330.227	292.553
117.58	58.409	0.222	0.222052	0.215732					1516.95	1484.05	1352.05					336.762	329.536	291.68
117.783	58.499	0.222224	0.222249	0.21594					1522.11	1489.03	1352.44					338.249	330.937	292.046
117.986	58.619	0.221842	0.22282	0.216284					1514.85	1484.5	1353.69					336.056	330.777	292.781
118.191	58.739	0.222001	0.222495	0.215627					1513.56	1482.28	1354.28					336.011	329.8	292.021
118.394	58.83	0.222473	0.222595	0.216283					1521.5	1484.83	1351.71					338.492	330.517	292.352
118.598	58.916	0.221941	0.222373	0.216145					1514.42	1483.27	1349.16					336.113	329.838	291.614
118.801	59.01	0.222317	0.22256	0.215855					1519.72	1487.5	1350.69					337.859	331.058	291.553
119.004	59.1	0.222537	0.222984	0.216051					1511.92	1485.43	1351.5					336.458	331.228	291.993
119.209	59.22	0.221813	0.222715	0.215695					1514.91	1483.24	1351.23					336.026	330.34	291.453
119.412	59.34	0.222424	0.222654	0.216654					1523.67	1491.44	1350.39					338.9	332.075	292.568
119.617	59.461	0.221785	0.222659	0.216321					1510.6	1481.61	1348.59					335.029	329.892	291.728
119.82	59.551	0.222447	0.222754	0.216245					1518	1490.41	1348.94					337.673	331.995	291.7
120.023	59.615	0.222613	0.222742	0.21659					1518.33	1488.42	1350.09					338	331.533	292.414
120.227	59.735	0.222423	0.222583	0.216282					1514.88	1486.34	1349.63					336.945	330.833	291.901
120.431	59.851	0.222809	0.222682	0.216759					1517.97	1486.69	1348.37					338.218	331.06	292.27
120.635	59.942	0.222506	0.222949	0.216301					1512.15	1482.36	1346.04					336.462	330.49	291.151
120.837	60.032	0.222665	0.222133	0.217164					1520.56	1493.07	1349.57					338.575	331.661	293.077
121.04	60.122	0.222268	0.223433	0.217063					1515.54	1489.36	1347.67					336.857	332.772	292.53
121.245	60.242	0.222362	0.22272	0.216439					1512.42	1486.96	1346.07					336.306	331.175	291.342
121.449	60.332	0.222423	0.223146	0.217051					1517.62	1485.38	1347.57					337.554	331.456	292.492
121.654	60.453	0.222826	0.222876	0.216721					1510.31	1482.82	1348					336.535	330.485	292.139
121.856	60.543	0.222731	0.22315	0.216162					1517.54	1487.06	1350.37					338.003	331.837	291.899
122.059	60.663	0.222731	0.222835	0.216479					1515.45	1482.99	1343.23					337.536	330.462	290.78
122.263	60.753	0.222641	0.222396	0.217186					1514.96	1487.77	1342.25					337.291	330.874	291.517
122.466	60.844	0.222768	0.223151	0.2169					1512.42	1488.38	1344.41					336.919	332.135	291.602
122.672	60.934	0.222839	0.223444	0.21691					1512.79	1485.6	1343.08					337.109	331.95	291.327
122.874	61.054	0.223199	0.223595	0.217037					1518.24	1482.78	1343.27					338.869	331.543	291.538
123.078	61.144	0.22338	0.223428	0.217459					1503.95	1480.99	1342.47					335.951	330.895	291.931
123.281	61.265	0.222784	0.223886	0.216403					1518.91	1489.05	1342.73					338.389	333.377	290.571
123.485	61.415	0.22307	0.223721	0.217276					1514.56	1482.25	1341.4					337.854	331.61	291.455
123.689	61.505	0.222932	0.222862	0.217838					1517.22	1489.44	1343.07					338.237	331.939	292.571
123.892	61.595	0.223734	0.223874	0.217479					1511.39	1480.15	1342.91					338.148	331.366	292.055
124.094	61.656	0.222572	0.223543	0.21732					1516.01	1481.33	1341.72					337.422	331.142	291.583
124.299	61.746	0.22355	0.2233	0.217714					1517.01	1490.15	1341.09					339.128	332.75	291.975
124.504	61.866	0.222628	0.223312	0.21729					1509.67	1484.95	1342.01					336.095	331.607	291.607
124.708	61.986	0.223276	0.223448	0.217342					1514.91	1488.68	1339.69					338.244	332.642	291.171
124.911	62.11	0.223287	0.223312	0.217398					1515.11	1483.08	1339.49					338.305	331.191	291.203
125.113	62.197	0.223063	0.223498	0.217739					1511.98	1480.75	1337.43					337.267	330.946	291.211
125.318	62.287	0.223509	0.224103	0.21745					1521.89	1489.82	1340.23					340.156	333.873	291.434
125.521	62.347	0.223313	0.223259	0.217617					1508.67	1484.89	1338.98					336.905	331.515	291.384
125.726	62.468	0.223787	0.223608	0.21731					1520.64	1488.57	1339.94					340.3	332.857	291.182
125.929	62.588	0.223618	0.22416	0.217934					1513.25	1484.05	1336.4					338.39	332.664	291.247
126.131	62.678	0.223405	0.224403	0.218006					1514.02	1483.13	1339.52					338.24	332.819	292.023
126.336	62.799	0.22382	0.223476	0.217482					1521.72	1485.07	1332.13					340.591	331.878	289.714
126.54	62.919	0.2233	0.223922	0.217955					1512.67	1484.68	1334.78					337.779	332.452	290.923
126.744	62.949	0.223318	0.22365	0.217978					1517.06	1487.3	1336.97					338.786	332.633	291.431
126.947	63.069	0.223314	0.224289	0.218502					1507.3	1484.36	1337.32					336.602	332.927	292.207
127.151	63.163	0.224047	0.223983	0.218229					1518	1485.45	1339.25					340.103	332.715	292.263
127.357	63.28	0.223966	0.224307	0.21803					1521.25	1483.64	1335.08					340.709	332.791	291.087
127.561	63.431	0.223764	0.224082	0.218985					1511.31	1487.25	1339.52					338.177	333.265	293.335
127.765	63.551	0.224228	0.223729	0.218356					1515.12	1485.04	1335.56					339.732	332.247	291.626
127.968	63.641	0.223486	0.223892	0.218206					1515.48	1491.02	1339.98					338.688	333.828	292.393
128.171	63.701	0.224156	0.22429	0.218425					1520.75	1490.02	1338.38					340.885	334.197	292.336
128.378	63.822	0.223654	0.223423	0.218161					1521.76	1483.59	1337.78					340.348	331.468	291.852
128.581	63.942	0.224093	0.224065	0.218665					1517.45	1486.58	1341.95					340.051	333.091	293.437
128.785	64.033	0.223337	0.224477	0.218193					1526.3	1490.98	1340.88					340.879	334.69	292.571
128.989	64.093	0.223714	0.224313	0.218844					1511.51	1486.95	1342.97					338.145	333.542	293.901
129.192	64.213	0.223319	0.22445	0.218856					1525.61	1488.44	1338.88					340.697	334.08	293.021
129.399	64.303	0.2234	0.224417	0.219309					1523.61	1491.79	1339.76					340.375	334.785	293.821
129.603	64.424	0.22368	0.224695	0.219755					1518.85	1488.03	1342.01					339.738	334.353	294.912
129.807	64.57	0.224511	0.224453	0.219097					1521.09	1486.8	1337.62					341.5	333.716	293.068
130.011	64.635	0.224148	0.22415	0.219118					1523.01	1490.08	1339.92					341.38	334.002	293.601
130.214	64.785	0.223857	0.224442	0.219199					1525.32	1490.63	1342.63					341.453	334.56	294.304
130.42	64.815	0.223952	0.224178	0.21942					1525.68	1489.77	1338.07					341.68	333.974	293.599
130.623	64.875	0.223909	0.224367	0.219619					1531.49	1492.71	1338.79					342.915	334.916	294.023
130.828	65.026	0.223409	0.223892	0.219211					1532.65	1496.21	1340.49					342.408	334.991	293.851
131.032	65.146	0.223808	0.224315	0.219502					1523.25	1492.27	1337.57					340.915	334.739	293.599
131.235	65.297	0.223919	0.2245	0.219324					1534.01	1490.48	1338.4					343.494	334.612	293.543
131.441	65.361	0.224068	0.22432	0.2198					1534.78	1493.24	1340.77					343.895	334.963	294.702
131.644	65.417	0.224638	0.224842	0.219917					1550.03	1498.36	1338.98					348.196	336.894	294.464
131.848	65.542	0.223716	0.224078	0.21948					1557.01	1498.67	1339.48					348.328	335.82	293.989
132.052	65.688	0.224092	0.22404	0.219946					1569.07	1506.4	1339.54					351.616	337.495	294.628
132.256	65.779	0.224076	0.224674	0.219815					1580.73	1523.7	1339.05					354.205	342.337	294.344
132.462	65.839	0.224224	0.22405	0.220036					1586.68	1540.37	1341.02					355.771	345.119	295.073
132.665	65.929	0.224282	0.224603	0.219938					1608.75	1551.01	1339.32					360.814	348.362	294.566
132.868	66.05	0.22455	0.224362	0.220412					1603.85	1558.02	1341.55					360.145	349.561	295.693
133.072	66.14	0.224632	0.225012	0.21974					1608.59	1570.6	1340.78					361.34	353.405	294.623
133.276	66.321	0.224725	0.224442	0.220521					1625.64	1579.17	1334.72					365.322	354.432	294.335
133.482	66.411	0.224859	0.224442	0.220484					1620.28	1585.71	1339.56					364.335	355.901	295.352
133.685	66.472	0.225131	0.22506	0.220665					1634.41	1589.64	1337.03					367.957	357.764	295.035
133.888	66.592	0.224955	0.225001	0.220726					1626.56	1595.93	1338.68					365.902	359.084	295.48
134.092	66.652	0.224891	0.225374	0.220941					1630.61	1603.09	1339.63					366.708	361.295	295.979
134.297	66.803	0.225456	0.225332	0.219869					1640.48	1605.03	1338.82					369.857	361.664	294.365
134.503	66.893	0.2254	0.225558	0.22059					1637.98	1601.89	1335.75					369.202	361.319	294.653
134.705	66.984	0.225773	0.225583	0.221024					1651.6	1610.33	1337.99					372.886	363.264	295.727
134.908	67.074	0.225633	0.22511	0.220616					1634.57	1609.52	1341.14					368.813	362.32	295.876
135.112	67.164	0.225491	0.225872	0.221273					1651.22	1611.93	1336.53					372.336	364.09	295.737
135.316	67.289	0.22563	0.225152	0.22085					1648.93	1611.29	1336.88					372.049	362.784	295.25
135.522	67.375	0.225396	0.226058	0.220385					1644.15	1612.71	1337.11					370.584	364.567	294.678
135.725	67.526	0.226122	0.225768	0.221523					1650.52	1614.34	1334.5					373.219	364.465	295.623
135.928	67.616	0.225939	0.225651	0.22153					1645.77	1622.66	1340.75					371.844	366.155	297.016
136.131	67.677	0.225688	0.226628	0.22102					1657.33	1621.68	1334.7					374.04	367.519	294.995
136.336	67.797	0.226161	0.226311	0.221597					1649.73	1621.89	1339.23					373.104	367.052	296.769
136.541	67.918	0.226385	0.226239	0.221181					1659.79	1623.33	1334.9					375.751	367.262	295.253
136.744	68.012	0.225874	0.226401	0.220924					1657.45	1622.48	1336.34					374.376	367.331	295.23
136.946	68.099	0.226727	0.225788	0.221104					1645.21	1628.01	1340.28					373.013	367.584	296.342
137.151	68.159	0.226034	0.226683	0.221119					1666.95	1626.84	1334.22					376.787	368.778	295.021
137.356	68.28	0.226989	0.226282	0.221663					1658.99	1632.62	1338.08					376.572	369.432	296.603
137.56	68.37	0.226223	0.226369	0.221532					1663.51	1632.53	1339.43					376.323	369.553	296.726
137.764	68.49	0.226357	0.225841	0.221518					1655.05	1633.62	1338.28					374.632	368.938	296.453
137.968	68.611	0.226658	0.226767	0.221649					1663.77	1635.93	1335.97					377.106	370.974	296.116
138.172	68.705	0.226554	0.227109	0.221421					1664.47	1630.28	1334.96					377.091	370.252	295.588
138.377	68.792	0.226833	0.226645	0.221569					1662.23	1635.34	1338.23					377.048	370.643	296.51
138.582	68.943	0.227163	0.226805	0.221798					1674.13	1638.79	1338.8					380.301	371.687	296.943
138.785	69.063	0.22653	0.227507	0.221639					1664.77	1642.54	1337.59					377.119	373.69	296.462
138.988	69.154	0.22724	0.227317	0.221629					1665.9	1640.3	1336.91					378.559	372.868	296.298
139.192	69.218	0.226396	0.227507	0.222784					1665.68	1638.96	1333.86					377.103	372.875	297.162
139.397	69.334	0.226834	0.227627	0.222117					1664.94	1640.77	1336.54					377.665	373.484	296.87
139.601	69.398	0.227341	0.22735	0.221499					1668.06	1643.76	1332.79					379.218	373.709	295.212
139.805	69.515	0.226885	0.2273	0.222244					1657.27	1642.89	1338.26					376.01	373.43	297.42
140.008	69.636	0.227059	0.227506	0.222091					1666.89	1641.32	1333.27					378.482	373.409	296.106
140.212	69.727	0.226594	0.227097	0.222873					1663.72	1643.95	1332.3					376.989	373.335	296.935
140.416	69.847	0.227096	0.227013	0.222824					1659.39	1648.3	1333.55					376.843	374.186	297.146
140.622	69.911	0.227054	0.226988	0.222409					1664.81	1638.3	1334.52					378.003	371.874	296.809
140.825	70.028	0.227013	0.227403	0.222467					1647.77	1646.81	1336.92					374.066	374.489	297.421
141.029	70.122	0.22755	0.227158	0.222492					1658.59	1643.63	1333.45					377.412	373.364	296.682
141.233	70.269	0.227375	0.227162	0.222946					1645.9	1645.57	1333.11					374.236	373.811	297.211
141.437	70.394	0.227179	0.227302	0.222442					1647.86	1641.58	1336.75					374.358	373.134	297.348
141.642	70.484	0.22728	0.227474	0.222785					1649.4	1641.19	1334.62					374.876	373.328	297.333
141.845	70.571	0.227689	0.227578	0.22256					1630.35	1641.68	1337.12					371.212	373.609	297.589
142.048	70.665	0.227535	0.22758	0.222248					1644.75	1640.27	1333.74					374.238	373.292	296.422
142.253	70.722	0.227638	0.227798	0.223029					1626.13	1640.33	1333.63					370.169	373.664	297.438
142.458	70.816	0.227407	0.227615	0.223544					1633.86	1638.69	1329.89					371.55	372.991	297.288
142.663	70.933	0.227207	0.227489	0.2229					1630.62	1635.9	1334.3					370.489	372.148	297.416
142.866	71.084	0.227297	0.227228	0.223239					1614.86	1637.06	1334.31					367.053	371.986	297.869
143.069	71.178	0.226951	0.227633	0.222928					1623.3	1626.85	1329.35					368.408	370.324	296.349
143.275	71.295	0.22752	0.227566	0.223236					1615.06	1629.26	1328.28					367.458	370.764	296.519
143.479	71.385	0.227912	0.227791	0.223471					1612.4	1625.15	1329.82					367.486	370.195	297.177
143.683	71.506	0.227578	0.227871	0.22344					1607.25	1619.02	1326.55					365.774	368.927	296.405
143.886	71.536	0.227334	0.228078	0.223322					1610.23	1621.66	1332.83					366.06	369.863	297.652
144.089	71.661	0.22712	0.228012	0.223329					1617.35	1618.55	1329.88					367.332	369.049	297.002
144.295	71.782	0.227889	0.227754	0.223128					1604.71	1614.77	1330.01					365.695	367.771	296.763
144.499	71.902	0.228183	0.227939	0.223866					1608.47	1606.46	1327.12					367.026	366.175	297.098
144.704	71.989	0.227266	0.228071	0.22273					1605.08	1603.23	1330.73					364.781	365.65	296.393
144.906	72.053	0.228196	0.228153	0.223155					1603.2	1601.39	1329.97					365.843	365.362	296.788
145.109	72.17	0.228319	0.228122	0.223704					1600.32	1590.89	1327.37					365.384	362.918	296.939
145.315	72.294	0.228136	0.227549	0.223669					1598.09	1595.56	1326.85					364.581	363.067	296.776
145.518	72.415	0.228211	0.227939	0.222822					1595.48	1593.94	1327.64					364.106	363.321	295.826
145.723	72.502	0.227769	0.228206	0.22343					1581.12	1585.32	1328.14					360.129	361.781	296.747
145.926	72.566	0.22805	0.228104	0.22353					1599.75	1591.16	1330.22					364.824	362.948	297.344
146.129	72.687	0.228084	0.228276	0.224078					1590.14	1582.73	1325.98					362.686	361.299	297.122
146.336	72.777	0.228038	0.228751	0.223791					1591.01	1573.89	1325.86					362.81	360.029	296.716
146.54	72.898	0.228357	0.228402	0.223516					1599.16	1571.82	1324.87					365.181	359.006	296.129
146.745	73.015	0.228077	0.228578	0.223706					1587.93	1573.91	1326.11					362.171	359.762	296.658
146.948	73.075	0.228221	0.227957	0.223815					1597.27	1571.4	1323.71					364.53	358.212	296.267
147.153	73.166	0.227725	0.22776	0.224418					1597.49	1572.93	1321.62					363.787	358.251	296.594
147.36	73.287	0.227722	0.22847	0.224417					1597.77	1571.67	1324.78					363.848	359.079	297.304
147.564	73.411	0.228714	0.228071	0.224484					1583.28	1573.87	1323.29					362.119	358.954	297.057
147.768	73.532	0.228415	0.228739	0.224042					1579.87	1576.6	1327.31					360.866	360.629	297.374
147.972	73.619	0.228153	0.228613	0.224212					1594.5	1572.62	1321.98					363.79	359.521	296.404
148.176	73.709	0.228102	0.22871	0.224005					1583.05	1576.06	1322.39					361.096	360.461	296.221
148.383	73.83	0.227893	0.228526	0.224496					1580.23	1576.9	1321.78					360.123	360.363	296.734
148.586	73.921	0.228572	0.228191	0.224318					1579.28	1573.72	1322.17					360.979	359.11	296.585
148.791	74.041	0.22837	0.228044	0.224522					1568.39	1583.84	1321.85					358.172	361.185	296.784
148.995	74.102	0.228555	0.227745	0.224272					1568.33	1583.19	1319.25					358.449	360.563	295.871
149.199	74.196	0.228984	0.228021	0.224287					1568.49	1602.33	1321.14					359.159	365.365	296.315
149.406	74.283	0.229575	0.227697	0.22429					1571.55	1583.55	1318.35					360.79	360.57	295.692
149.61	74.434	0.229268	0.228639	0.224335					1568.87	1580.21	1322.89					359.69	361.299	296.77
149.814	74.559	0.229035	0.227578	0.224224					1578.26	1575.25	1320.83					361.475	358.492	296.161
150.018	74.585	0.228791	0.22841	0.224256					1586.54	1563.37	1319.48					362.986	357.091	295.902
150.223	74.77	0.229417	0.228974	0.224487					1587.77	1562.22	1320.6					364.263	357.709	296.459
150.429	74.857	0.22945	0.228525	0.225284					1595.61	1547.4	1317.88					366.113	353.62	296.898
150.632	74.948	0.229164	0.229212	0.224754					1595.71	1542.5	1320.37					365.679	353.559	296.758
150.836	75.042	0.22837	0.2285	0.224935					1603.16	1546.41	1321.34					366.112	353.355	297.216
151.04	75.163	0.229247	0.228603	0.224267					1605.85	1540.31	1317.61					368.136	352.121	295.495
151.244	75.22	0.228897	0.228887	0.224625					1603.79	1548.23	1318.71					367.103	354.371	296.214
151.451	75.314	0.228681	0.228059	0.224446					1601.31	1540.02	1318.5					366.189	351.215	295.931
151.655	75.431	0.228902	0.228644	0.224986					1608.99	1541.27	1317.7					368.301	352.401	296.463
151.858	75.612	0.228985	0.228436	0.225253					1617.41	1553.14	1317.64					370.362	354.791	296.802
152.062	75.646	0.228882	0.228662	0.224659					1609.01	1556.45	1320.12					368.273	355.901	296.578
152.266	75.767	0.2291	0.228674	0.224852					1625.89	1562.04	1316.23					372.491	357.199	295.957
152.473	75.888	0.228905	0.229082	0.225164					1615.57	1551.33	1317.79					369.813	355.381	296.719
152.676	75.975	0.229259	0.22881	0.225415					1623.43	1563.46	1315.42					372.186	357.735	296.515
152.879	76.069	0.229767	0.229229	0.225441					1625.46	1564.82	1313.16					373.477	358.703	296.041
153.084	76.19	0.228944	0.229091	0.224797					1624.07	1562.4	1311.21					371.821	357.93	294.756
153.288	76.247	0.229138	0.228589	0.225354					1639.95	1567.26	1310.78					375.773	358.257	295.39
153.494	76.341	0.229593	0.227939	0.225046					1621.99	1567.48	1314.51					372.396	357.289	295.826
153.698	76.462	0.229755	0.229591	0.225645					1613.26	1568.41	1312					370.655	360.092	296.047
153.901	76.579	0.230251	0.229579	0.225648					1602.17	1562.1	1312.69					368.902	358.626	296.207
154.105	76.704	0.230133	0.229658	0.225702					1587.71	1557.7	1313.66					365.384	357.738	296.497
154.31	76.794	0.230333	0.229684	0.22569					1577.74	1554.89	1312.77					363.406	357.135	296.279
154.516	76.912	0.230305	0.229822	0.225263					1568.1	1558.12	1311.03					361.14	358.089	295.326
154.719	77.002	0.229612	0.230494	0.225341					1559.24	1557.52	1309.12					358.021	359.001	294.999
154.921	77.067	0.229808	0.230584	0.226566					1533.04	1553.11	1311.53					352.304	358.123	297.147
155.126	77.157	0.229661	0.230843	0.226507					1515.4	1550.81	1308.94					348.028	357.992	296.482
155.331	77.274	0.229501	0.229889	0.225598					1500.8	1551.2	1309.04					344.435	356.604	295.316
155.537	77.365	0.229271	0.230459	0.225477					1466.48	1553.9	1311.5					336.222	358.109	295.714
155.74	77.49	0.229318	0.230221	0.226207					1424.71	1546.15	1308.34					326.712	355.957	295.955
155.944	77.641	0.229437	0.230016	0.225774					1370.84	1548.43	1308.04					314.522	356.162	295.322
156.149	77.762	0.228754	0.23036	0.225404					1263.72	1551.15	1310.88					289.082	357.321	295.478
156.354	77.852	0.228555	0.230292	0.22654					1039.08	1548.31	1308.22					237.488	356.563	296.364
156.558	77.943	0.229363	0.230778	0.225978					704.73	1554.67	1307.77					161.639	358.784	295.528
156.762	78.034	0.233611	0.230448	0.225656					454.646	1554.92	1308.23					106.21	358.328	295.212
156.965	78.121	0.236003	0.230503	0.226181					368.053	1548.64	1305.61					86.8616	356.967	295.305
157.17	78.211	0.236583	0.230837	0.2263					346.114	1553.33	1309.82					81.8849	358.567	296.411
157.374	78.306	0.235811	0.230177	0.225855					337.328	1545.77	1307.7					79.5456	355.801	295.351
157.58	78.363	0.236062	0.230824	0.22602					333.527	1550.62	1305.56					78.7329	357.921	295.084
157.783	78.544	0.236454	0.230603	0.226036					329.548	1546.32	1305.82					77.923	356.586	295.162
157.987	78.608	0.236652	0.230904	0.226125					326.594	1543.37	1302.07					77.2891	356.371	294.429
158.192	78.726	0.237034	0.230896	0.227203					323.448	1548.96	1303.13					76.6681	357.649	296.075
158.396	78.85	0.237526	0.230646	0.22609					317.91	1541.25	1303.89					75.5119	355.484	294.797
158.601	78.941	0.237425	0.23117	0.226412					316.332	1539.43	1304.45					75.1049	355.869	295.344
158.805	79.028	0.238653	0.231173	0.226186					313.473	1545.23	1305.09					74.8113	357.216	295.193
159.008	79.092	0.238135	0.231382	0.226475					311.365	1531.75	1304.13					74.1468	354.42	295.353
159.212	79.213	0.236672	0.230873	0.226831					312.361	1536.45	1300.41					73.9273	354.725	294.973
159.417	79.334	0.237545	0.230946	0.226489					308.308	1524.08	1302.96					73.2372	351.98	295.107
159.623	79.451	0.238706	0.231216	0.226241					307.934	1513.14	1298.69					73.5056	349.862	293.818
159.827	79.576	0.238225	0.230738	0.226932					305.626	1509.56	1299.47					72.8077	348.312	294.891
160.03	79.637	0.236661	0.230758	0.226556					303.371	1505.2	1303.88					71.7961	347.338	295.402
160.234	79.697	0.238662	0.230431	0.226792					301.491	1491.79	1301.11					71.9543	343.753	295.082
160.439	79.818	0.238206	0.230535	0.226894					299.354	1467.85	1300.96					71.3081	338.391	295.179
160.645	79.969	0.238418	0.230076	0.227001					300.151	1441.6	1298.74					71.5615	331.678	294.815
160.848	80.09	0.238503	0.229898	0.227125					296.472	1209.86	1297.45					70.7095	278.144	294.682
161.051	80.211	0.237739	0.231565	0.227268					294.481	913.674	1296					70.0098	211.575	294.539
161.257	80.272	0.238304	0.231547	0.227298					292.674	854.446	1294.56					69.7454	197.844	294.251
161.461	80.363	0.239632	0.231453	0.227367					290.21	826.219	1296.04					69.5437	191.23	294.676
161.666	80.484	0.238396	0.231383	0.227304					290.543	803.606	1295.28					69.2643	185.941	294.421
161.869	80.544	0.239067	0.231858	0.227112					288.354	787.946	1294.85					68.936	182.691	294.076
162.073	80.665	0.23953	0.232078	0.227067					288.11	760.625	1296.94					69.0109	176.524	294.491
162.279	80.787	0.238806	0.233095	0.227197					287.214	725.872	1295.62					68.5884	169.197	294.36
162.483	80.847	0.239279	0.231299	0.22722					286.37	706.874	1295.58					68.5225	163.5	294.382
162.688	80.968	0.23809	0.232544	0.227485					287.604	691.801	1293.33					68.4754	160.874	294.214
162.891	81.055	0.239405	0.232193	0.227206					284.658	678.277	1295.76					68.1484	157.492	294.404
163.094	81.176	0.23943	0.231632	0.226896					286.331	669.891	1292.97					68.5564	155.168	293.371
163.3	81.297	0.238616	0.232033	0.227584					283.972	661.74	1292.97					67.7601	153.546	294.259
163.504	81.388	0.23877	0.231267	0.227568					284.708	657.573	1291.29					67.9797	152.075	293.856
163.709	81.483	0.23907	0.233617	0.22705					281.681	646.56	1290.73					67.3417	151.047	293.059
163.912	81.539	0.238319	0.232969	0.227898					282.025	644.92	1292.66					67.2118	150.246	294.595
164.115	81.66	0.23982	0.232977	0.228145					283.081	643.755	1291.74					67.8887	149.98	294.705
164.321	81.785	0.239077	0.23345	0.227071					280.794	637.235	1296.27					67.1313	148.763	294.345
164.525	81.906	0.238752	0.233135	0.227886					281.615	638.176	1288.44					67.236	148.781	293.617
164.73	81.997	0.240083	0.232615	0.22835					278.308	631.552	1289.93					66.8171	146.908	294.556
164.933	82.088	0.239922	0.233245	0.227994					278.952	629.102	1287.25					66.9269	146.735	293.487
165.137	82.175	0.238874	0.233465	0.227594					280.958	629.14	1289.84					67.1135	146.882	293.561
165.345	82.3	0.241203	0.232957	0.228133					275.407	626.582	1286.63					66.4288	145.966	293.523
165.549	82.387	0.239618	0.233848	0.227803					278.322	628.547	1288.9					66.6909	146.984	293.615
165.754	82.538	0.239429	0.232738	0.227998					276.245	626.034	1288.56					66.1412	145.702	293.788
165.958	82.66	0.240095	0.233168	0.227681					276.055	622.133	1284.59					66.2793	145.061	292.477
166.162	82.724	0.240888	0.233456	0.227657					276.089	621.961	1287.2					66.5066	145.201	293.04
166.368	82.815	0.239877	0.233378	0.227859					273.474	622.397	1287.16					65.6002	145.254	293.291
166.572	82.936	0.239825	0.233726	0.228049					275.788	622.813	1286.17					66.1407	145.568	293.31
166.775	82.996	0.240541	0.233015	0.22812					272.776	625.459	1286.13					65.6139	145.741	293.391
166.979	83.118	0.239431	0.233304	0.228782					274.23	623.638	1282.24					65.6592	145.498	293.353
167.183	83.239	0.240205	0.233247	0.22856					273.508	621.472	1283.67					65.698	144.957	293.394
167.39	83.329	0.24033	0.234477	0.228512					271.421	620.152	1281.56					65.2306	145.412	292.852
167.593	83.42	0.239327	0.233764	0.228258					272.57	617.861	1282.42					65.2334	144.434	292.722
167.798	83.511	0.240719	0.234209	0.22829					271.072	578.578	1279.18					65.2521	135.508	292.025
168.003	83.602	0.240553	0.234061	0.227843					270.793	569.401	1282.78					65.1401	133.274	292.272
168.207	83.723	0.241547	0.234413	0.228773					269.179	566.088	1282.38					65.0193	132.698	293.374
168.414	83.844	0.241984	0.235213	0.228481					267.78	564.384	1280.96					64.7985	132.75	292.675
168.618	83.966	0.239703	0.234261	0.228566					270.272	564.551	1280.61					64.7852	132.252	292.704
168.822	84.087	0.241422	0.233972	0.228448					267.128	565.189	1281.74					64.4907	132.239	292.811
169.026	84.147	0.242108	0.233966	0.228686					268.631	561.738	1277.82					65.0376	131.427	292.22
169.231	84.269	0.24083	0.234389	0.22922					267.391	562.449	1278.11					64.396	131.832	292.968
169.437	84.36	0.240597	0.233341	0.228401					267.417	565.443	1278.23					64.3398	131.941	291.949
169.641	84.45	0.241672	0.233613	0.228396					268.142	564.383	1276.7					64.8026	131.847	291.594
169.845	84.541	0.240065	0.233431	0.229482					267.41	566.852	1274.06					64.1957	132.32	292.375
170.049	84.632	0.240638	0.233486	0.228228					266.532	568.063	1278.23					64.1376	132.635	291.728
170.254	84.753	0.241828	0.233772	0.229115					263.216	568.081	1275.85					63.6528	132.802	292.316
170.461	84.844	0.241262	0.233226	0.228923					263.067	570.47	1274.67					63.4681	133.049	291.802
170.665	84.962	0.241745	0.233803	0.228812					263.092	569.906	1274.86					63.6012	133.246	291.705
170.868	85.083	0.241659	0.234127	0.228448					262.231	570.427	1274.38					63.3707	133.553	291.128
171.073	85.178	0.2413	0.234534	0.229149					263.396	570.67	1271.96					63.5573	133.842	291.468
171.278	85.269	0.242092	0.233996	0.228826					261.424	572.792	1273.26					63.2888	134.031	291.356
171.484	85.359	0.24181	0.234483	0.229042					263.074	572.695	1272.27					63.614	134.287	291.403
171.688	85.481	0.241392	0.234463	0.229188					261.063	570.853	1268.14					63.0185	133.844	290.642
171.891	85.541	0.242249	0.234029	0.229884					260.968	571.127	1270.35					63.2193	133.66	292.033
172.095	85.662	0.241427	0.235154	0.228973					261.808	541.003	1269.74					63.2074	127.219	290.737
172.3	85.753	0.241781	0.235437	0.228707					258.772	476.484	1273.74					62.5662	112.182	291.313
172.506	85.875	0.242251	0.236447	0.228998					260.045	467.256	1267.61					62.9961	110.481	290.281
172.71	85.966	0.241433	0.236538	0.229467					259.017	463.377	1266.78					62.5351	109.607	290.685
172.914	86.087	0.242316	0.236847	0.229164					257.076	459.184	1267.45					62.2936	108.756	290.454
173.119	86.239	0.241766	0.236981	0.229728					255.544	458.93	1266.15					61.7819	108.758	290.87
173.324	86.329	0.242371	0.236219	0.229874					255.263	460.628	1265.59					61.8683	108.809	290.925
173.529	86.451	0.241605	0.235943	0.230271					255.552	459.391	1262.82					61.7426	108.39	290.79
173.732	86.508	0.242648	0.236266	0.229296					253.049	456.916	1267.2					61.4018	107.954	290.564
173.936	86.599	0.241283	0.236225	0.230415					254.956	455.426	1264.77					61.5166	107.583	291.423
174.141	86.693	0.241335	0.236146	0.229901					254.288	453.107	1261.77					61.3685	106.999	290.083
174.346	86.815	0.242784	0.235476	0.229843					252.46	453.318	1263.83					61.2935	106.745	290.483
174.551	86.936	0.242585	0.236195	0.229676					253.663	449.618	1261.73					61.5349	106.198	289.789
174.755	87.027	0.241315	0.236327	0.229323					251.94	450.532	1264.04					60.7968	106.473	289.873
174.958	87.087	0.240812	0.23649	0.229328					254.074	448.991	1261.2					61.1842	106.182	289.228
175.163	87.209	0.24178	0.236313	0.229374					252.183	449.556	1261.54					60.9729	106.236	289.365
175.369	87.33	0.243114	0.236487	0.22947					251.052	450.377	1260.41					61.0341	106.508	289.227
175.574	87.421	0.242431	0.235682	0.229839					253.64	451.383	1259.53					61.4901	106.383	289.49
175.778	87.482	0.243115	0.236891	0.229248					251.594	451.385	1262.18					61.1663	106.929	289.353
175.981	87.603	0.241841	0.237639	0.230046					253.121	450.234	1258.1					61.2148	106.993	289.422
176.186	87.72	0.244144	0.238687	0.23028					249.702	405.614	1258.85					60.9633	96.8145	289.888
176.391	87.815	0.24302	0.239396	0.229887					250.49	338.317	1253.65					60.8741	80.9917	288.198
176.596	87.967	0.24162	0.23899	0.230045					251.302	339.481	1257.13					60.7195	81.1326	289.197
176.8	88.028	0.242869	0.238626	0.230388					249.395	341.258	1258.63					60.5704	81.433	289.973
177.004	88.119	0.242741	0.239759	0.230054					251.168	340.839	1255.45					60.9688	81.7193	288.823
177.208	88.244	0.242908	0.238022	0.23047					248.832	344.162	1256.92					60.4433	81.9183	289.681
177.412	88.331	0.243404	0.240179	0.230584					249.383	342.514	1253.13					60.7008	82.2645	288.951
177.619	88.452	0.242473	0.239208	0.230816					248.115	342.864	1252.91					60.1611	82.0157	289.192
177.823	88.574	0.243389	0.240297	0.230399					249.099	342.474	1253.73					60.628	82.2956	288.857
178.027	88.604	0.242313	0.239674	0.230344					248.326	342.269	1250.8					60.1725	82.0331	288.115
178.231	88.756	0.243655	0.238639	0.23025					243.705	344.045	1255.52					59.38	82.1026	289.083
178.436	88.816	0.243168	0.239763	0.23014					243.597	342.337	1250.42					59.235	82.0797	287.773
178.642	88.907	0.24272	0.23975	0.230875					242.194	343.09	1248.95					58.7854	82.2558	288.35
178.845	89.029	0.242937	0.240244	0.230159					242.648	345.061	1249.27					58.9483	82.8988	287.53
179.049	89.12	0.243238	0.239565	0.231068					239.231	345.672	1247.39					58.19	82.811	288.231
179.254	89.241	0.2438	0.240174	0.230616					232.913	346.529	1251.02					56.7842	83.2271	288.504
179.458	89.363	0.245254	0.239287	0.230486					233.395	346.999	1246.99					57.241	83.0323	287.412
179.664	89.484	0.243742	0.240474	0.231266					231.908	346.381	1248.78					56.5258	83.2957	288.799
179.867	89.575	0.244423	0.239562	0.23095					232.901	346.143	1246.1					56.9264	82.9226	287.786
180.071	89.696	0.244677	0.239769	0.23142					231.719	348.915	1246.37					56.6963	83.6589	288.436
180.277	89.757	0.244279	0.240287	0.230397					230.638	350.121	1247.05					56.3401	84.1295	287.315
180.481	89.848	0.244163	0.239407	0.230911					230.825	349.581	1241.46					56.3588	83.6923	286.667
180.687	89.97	0.243863	0.239919	0.231127					230.145	353.107	1245.64					56.1238	84.7171	287.901
180.89	90.061	0.243913	0.23883	0.231253					231.041	352.473	1241.8					56.3538	84.1811	287.169
181.094	90.152	0.24468	0.240312	0.23142					230.854	353.281	1241.72					56.4855	84.8978	287.358
181.3	90.269	0.244924	0.240349	0.23161					230.138	355.385	1240.21					56.3661	85.4164	287.244
181.504	90.364	0.24494	0.239649	0.230391					229.695	355.171	1241.13					56.2614	85.1164	285.946
181.71	90.486	0.244357	0.240605	0.230949					227.978	355.931	1241.66					55.708	85.6387	286.76
181.913	90.576	0.245793	0.240397	0.231514					229.404	356.782	1241.62					56.3858	85.7695	287.452
182.116	90.698	0.243967	0.239532	0.231052					228.768	358.018	1241.93					55.8119	85.7567	286.95
182.322	90.759	0.244918	0.240891	0.230966					228.481	359.263	1237.31					55.9591	86.5433	285.777
182.526	90.91	0.243962	0.239904	0.230622					228.443	360.252	1235.6					55.7314	86.4257	284.956
182.731	91.002	0.243601	0.240465	0.231915					227.894	361.382	1235.1					55.5151	86.8995	286.439
182.935	91.093	0.245106	0.241342	0.231137					228.374	361.108	1234.93					55.976	87.1506	285.438
183.139	91.184	0.246058	0.240439	0.231227					226.926	362.171	1236.42					55.837	87.0802	285.893
183.347	91.275	0.245363	0.239901	0.231628					226.183	362.163	1232.55					55.4968	86.8831	285.492
183.551	91.396	0.245187	0.241326	0.231412					226.992	364.621	1234.42					55.6555	87.9926	285.659
183.757	91.518	0.244911	0.240351	0.231632					226.48	367.125	1234.89					55.4675	88.2391	286.041
183.961	91.609	0.245109	0.240204	0.231251					226.084	365.76	1233.91					55.4154	87.8572	285.345
184.166	91.7	0.244624	0.240795	0.231561					226.435	367.433	1229.45					55.3916	88.476	284.692
184.373	91.791	0.245641	0.240551	0.23152					224.543	367.512	1231.73					55.157	88.4055	285.17
184.578	91.882	0.244892	0.240111	0.231253					225.656	370.324	1229.51					55.2612	88.9191	284.328
184.783	92.004	0.245786	0.240984	0.232402					224.718	372.97	1230.87					55.2324	89.88	286.057
184.988	92.125	0.244651	0.241289	0.231821					218.345	370.776	1228.68					53.4182	89.4643	284.833
185.192	92.277	0.245722	0.240638	0.232241					218.162	376.289	1228.3					53.6071	90.5495	285.261
185.4	92.311	0.245747	0.240013	0.231625					217.335	375.261	1227.47					53.4095	90.0675	284.314
185.604	92.398	0.247086	0.24085	0.23144					216.694	376.23	1228.95					53.5421	90.6149	284.429
185.809	92.554	0.24633	0.241354	0.231921					218.167	377.702	1222.94					53.7411	91.16	283.625
186.014	92.646	0.245857	0.24107	0.231912					215.957	379.713	1226.2					53.0944	91.5373	284.371
186.218	92.733	0.246682	0.241697	0.231779					216.033	381.836	1225.58					53.2915	92.2887	284.064
186.425	92.824	0.247743	0.239443	0.231979					214.914	381.933	1224.59					53.2435	91.4509	284.08
186.629	92.945	0.246251	0.240045	0.231775					215.871	385.749	1224.86					53.1584	92.597	283.892
186.834	93.006	0.245677	0.241345	0.231588					215.426	386.065	1221.41					52.9252	93.1746	282.864
187.039	93.128	0.246547	0.24019	0.232122					215.28	388.515	1222.73					53.0766	93.3173	283.823
187.244	93.219	0.247845	0.240955	0.232971					214.346	388.857	1220.3					53.1246	93.6973	284.294
187.451	93.31	0.245794	0.239689	0.231723					213.826	390.922	1220.55					52.557	93.6996	282.829
187.655	93.432	0.246217	0.241768	0.232727					213.735	391.024	1218.49					52.6252	94.537	283.575
187.859	93.492	0.246773	0.239752	0.232348					213.427	390.546	1215.54					52.6682	93.6342	282.429
188.064	93.614	0.247714	0.241231	0.232735					212.467	393.09	1216.27					52.6311	94.8256	283.07
188.269	93.739	0.245966	0.240555	0.2322					212.259	394.194	1215.53					52.2085	94.8251	282.246
188.475	93.827	0.247763	0.24132	0.232758					210.6	394.304	1214.94					52.1788	95.1535	282.787
188.679	93.918	0.247481	0.240593	0.232402					210.766	396.786	1215.82					52.1605	95.464	282.559
188.883	94.039	0.246327	0.240496	0.232318					210.53	395.773	1216.25					51.8591	95.1818	282.558
189.088	94.161	0.246883	0.239831	0.232593					209.8	399.176	1214.07					51.796	95.7347	282.384
189.293	94.252	0.247223	0.241514	0.232577					210.394	398.496	1212.92					52.0142	96.2424	282.097
189.5	94.313	0.247299	0.24183	0.232341					209.619	399.932	1213.95					51.8386	96.7157	282.051
189.704	94.434	0.247389	0.241621	0.232785					208.815	400.688	1207.63					51.6584	96.8145	281.117
189.908	94.556	0.245846	0.240673	0.232785					209.898	402.406	1211.54					51.6026	96.8484	282.028
190.112	94.617	0.246404	0.241925	0.232778					209.118	404.913	1210.79					51.5276	97.9583	281.845
190.318	94.773	0.246912	0.242161	0.232614					207.995	403.743	1208.69					51.3565	97.7708	281.157
190.524	94.803	0.248635	0.241061	0.231972					207.641	405.433	1206.87					51.6268	97.7342	279.96
190.727	94.955	0.247623	0.241547	0.232929					207.483	407.876	1208.22					51.3776	98.5213	281.431
190.931	95.046	0.247103	0.241035	0.233226					207.716	407.619	1208.63					51.3273	98.2505	281.884
Inflection Temperatures (ratio)
Capillary label		Ti [°C]	Ratio @ Ti
KIF13A		67.0514	0.225668
		78.345	0.235983
		90.743	0.244668
Affected NONHSAT002007		67.6072	0.225662
		81.4943	0.233487
		86.9537	0.236221
Unaffected NONHSAT002007		64.8136	0.219409

## Sheet: Profiles_smoothed
	Signal:	Ratio 350 nm / 330 nm							Brightness @ 330 nm							Brightness @ 350 nm
	Capillary:	1	2	3					1	2	3					1	2	3
	Temperature [°C]	KIF13A	Affected NONHSAT002007	Unaffected NONHSAT002007					KIF13A	Affected NONHSAT002007	Unaffected NONHSAT002007					KIF13A	Affected NONHSAT002007	Unaffected NONHSAT002007
	35.15	0.212891	0.213197	0.204631					1547.32	1514.49	1424.47					329.33	322.747	291.192
	35.269	0.212926	0.21322	0.204672					1547.21	1514.42	1424.12					329.372	322.791	291.221
	35.419	0.212967	0.213249	0.204719					1547.06	1514.35	1423.66					329.426	322.851	291.258
	35.538	0.213003	0.213277	0.204759					1546.94	1514.28	1423.3					329.471	322.897	291.29
	35.717	0.213058	0.213318	0.20482					1546.77	1514.19	1422.79					329.535	322.966	291.333
	35.836	0.213094	0.213348	0.20486					1546.65	1514.12	1422.44					329.579	323.011	291.364
	35.926	0.213124	0.213369	0.20489					1546.55	1514.08	1422.18					329.611	323.047	291.385
	36.015	0.213152	0.213391	0.204922					1546.46	1514.03	1421.92					329.643	323.079	291.409
	36.131	0.213189	0.213419	0.204963					1546.34	1513.97	1421.57					329.684	323.122	291.437
	36.22	0.213218	0.213441	0.204994					1546.25	1513.92	1421.31					329.717	323.156	291.46
	36.31	0.213249	0.213463	0.205027					1546.17	1513.86	1421.18					329.749	323.192	291.482
	36.399	0.213279	0.213484	0.205059					1546.07	1513.81	1421.06					329.781	323.225	291.505
	36.493	0.213311	0.213508	0.205093					1545.98	1513.76	1420.94					329.815	323.261	291.528
	36.642	0.213363	0.213551	0.205149					1545.82	1513.67	1420.66					329.869	323.316	291.566
	36.701	0.213384	0.213571	0.205172					1545.77	1513.63	1420.55					329.891	323.338	291.579
	36.847	0.213435	0.213622	0.205235					1545.62	1513.55	1420.13					329.942	323.392	291.615
	36.91	0.213459	0.213645	0.205261					1545.55	1513.51	1419.98					329.965	323.415	291.632
	37.03	0.21351	0.213693	0.205311					1545.43	1513.44	1419.75					330.007	323.46	291.66
	37.119	0.213547	0.213731	0.205348					1545.35	1513.38	1419.63					330.039	323.493	291.683
	37.238	0.213597	0.213784	0.205399					1545.23	1513.31	1419.46					330.082	323.538	291.711
	37.298	0.213624	0.21381	0.205428					1545.17	1513.27	1419.37					330.103	323.561	291.726
	37.418	0.213677	0.213862	0.205488					1545.05	1513.2	1419.16					330.146	323.608	291.755
	37.503	0.213716	0.213897	0.20553					1544.97	1513.15	1418.99					330.176	323.642	291.775
	37.626	0.213774	0.213944	0.205595					1544.84	1513.07	1418.71					330.219	323.692	291.805
	37.716	0.213818	0.213978	0.205646					1544.75	1512.97	1418.51					330.251	323.728	291.827
	37.806	0.21386	0.214011	0.205702					1544.66	1512.87	1418.31					330.283	323.761	291.849
	37.865	0.213892	0.214033	0.205735					1544.6	1512.82	1418.25					330.304	323.779	291.863
	38.018	0.213954	0.214089	0.205832					1544.45	1512.64	1418.19					330.358	323.836	291.899
	38.134	0.213999	0.214136	0.205898					1544.32	1512.51	1418.23					330.399	323.87	291.927
	38.223	0.214037	0.214172	0.205942					1544.23	1512.38	1418.25					330.431	323.898	291.949
	38.313	0.214068	0.214209	0.205987					1544.12	1512.26	1418.23					330.462	323.927	291.97
	38.373	0.214094	0.214231	0.20601					1544.05	1512.17	1418.17					330.483	323.945	291.984
	38.522	0.214141	0.21429	0.206068					1543.87	1511.96	1417.93					330.535	323.99	292.02
	38.641	0.214179	0.214334	0.206117					1543.72	1511.77	1417.67					330.576	324.027	292.048
	38.731	0.214206	0.214364	0.206156					1543.6	1511.64	1417.45					330.606	324.056	292.069
	38.791	0.214222	0.214385	0.206181					1543.52	1511.54	1417.24					330.626	324.074	292.084
	38.91	0.214256	0.214428	0.206232					1543.36	1511.37	1416.94					330.666	324.116	292.112
	39.03	0.214291	0.214471	0.206287					1543.19	1511.19	1416.58					330.706	324.158	292.14
	39.119	0.214318	0.214506	0.206331					1543.07	1511.06	1416.26					330.736	324.189	292.161
	39.239	0.214357	0.214558	0.206397					1542.92	1510.89	1415.82					330.777	324.236	292.19
	39.328	0.214387	0.214599	0.206448					1542.8	1510.77	1415.49					330.807	324.269	292.211
	39.418	0.214417	0.214637	0.206499					1542.69	1510.65	1415.21					330.838	324.305	292.233
	39.507	0.214448	0.214678	0.20656					1542.58	1510.53	1414.85					330.869	324.339	292.254
	39.597	0.21448	0.214725	0.206619					1542.47	1510.41	1414.71					330.9	324.374	292.276
	39.716	0.214526	0.214785	0.206701					1542.34	1510.25	1414.43					330.941	324.42	292.305
	39.866	0.214581	0.214864	0.206798					1542.18	1510.06	1414.21					330.994	324.478	292.342
	39.955	0.214617	0.214909	0.206846					1542.08	1509.95	1414.08					331.024	324.512	292.364
	40.015	0.214641	0.21494	0.206879					1542.02	1509.86	1414.01					331.046	324.537	292.379
	40.135	0.214692	0.215002	0.20694					1541.89	1509.71	1413.89					331.087	324.584	292.41
	40.254	0.214743	0.215061	0.206996					1541.77	1509.57	1413.8					331.128	324.631	292.436
	40.344	0.214783	0.215108	0.207032					1541.67	1509.46	1413.71					331.159	324.669	292.454
	40.433	0.214823	0.215156	0.207068					1541.57	1509.34	1413.58					331.189	324.706	292.474
	40.493	0.214851	0.215182	0.207091					1541.51	1509.27	1413.42					331.208	324.73	292.486
	40.642	0.21492	0.21526	0.207143					1541.31	1509.09	1412.97					331.257	324.794	292.519
	40.728	0.21496	0.215299	0.207176					1541.2	1508.99	1412.68					331.283	324.832	292.536
	40.848	0.215014	0.21535	0.207224					1541.04	1508.85	1412.22					331.32	324.883	292.561
	40.911	0.215042	0.215376	0.207248					1540.95	1508.77	1412.01					331.339	324.908	292.572
	41.061	0.215104	0.215437	0.207324					1540.73	1508.61	1411.52					331.384	324.973	292.6
	41.15	0.21514	0.215473	0.207372					1540.58	1508.51	1411.22					331.41	325.009	292.616
	41.24	0.215176	0.215509	0.207421					1540.43	1508.39	1410.93					331.436	325.044	292.633
	41.33	0.215211	0.215546	0.207471					1540.3	1508.29	1410.62					331.463	325.075	292.649
	41.449	0.215259	0.215596	0.207543					1540.11	1508.13	1410.18					331.499	325.119	292.668
	41.539	0.215294	0.215634	0.207596					1539.96	1508.01	1409.86					331.526	325.154	292.684
	41.625	0.215329	0.215668	0.207647					1539.82	1507.89	1409.57					331.552	325.183	292.697
	41.748	0.215376	0.215718	0.207721					1539.62	1507.73	1409.2					331.589	325.223	292.716
	41.838	0.215411	0.215752	0.207777					1539.48	1507.61	1408.98					331.618	325.25	292.729
	41.957	0.215456	0.215792	0.207854					1539.29	1507.45	1408.72					331.655	325.284	292.747
	42.047	0.215489	0.215824	0.207912					1539.15	1507.33	1408.53					331.683	325.31	292.759
	42.137	0.215523	0.215856	0.207968					1539.01	1507.21	1408.31					331.711	325.336	292.771
	42.252	0.215569	0.215901	0.208031					1538.84	1507.07	1407.96					331.749	325.37	292.787
	42.346	0.215607	0.215936	0.208075					1538.7	1506.95	1407.65					331.78	325.397	292.799
	42.436	0.215645	0.215974	0.208113					1538.57	1506.84	1407.38					331.81	325.424	292.81
	42.555	0.215696	0.216024	0.208158					1538.4	1506.69	1407.03					331.85	325.464	292.825
	42.675	0.215749	0.216073	0.208205					1538.24	1506.54	1406.69					331.892	325.5	292.84
	42.764	0.215788	0.216107	0.208237					1538.12	1506.42	1406.46					331.923	325.529	292.851
	42.884	0.215838	0.216147	0.208289					1537.96	1506.27	1406.07					331.964	325.568	292.865
	43.003	0.215887	0.216183	0.208344					1537.79	1506.12	1405.69					332.006	325.604	292.879
	43.033	0.2159	0.216192	0.208359					1537.76	1506.08	1405.59					332.016	325.614	292.883
	43.149	0.215948	0.216226	0.20842					1537.6	1505.91	1405.23					332.055	325.648	292.897
	43.269	0.215998	0.216263	0.208476					1537.43	1505.74	1404.91					332.094	325.682	292.911
	43.362	0.216037	0.216294	0.208517					1537.3	1505.62	1404.69					332.124	325.709	292.922
	43.482	0.21609	0.216342	0.208561					1537.12	1505.45	1404.45					332.162	325.745	292.936
	43.572	0.216128	0.216383	0.208591					1536.99	1505.33	1404.26					332.189	325.769	292.946
	43.661	0.216167	0.216425	0.208625					1536.85	1505.22	1404.09					332.215	325.794	292.956
	43.747	0.216205	0.216466	0.208663					1536.72	1505.11	1403.94					332.241	325.82	292.966
	43.901	0.216274	0.216538	0.208742					1536.47	1504.92	1403.66					332.285	325.866	292.983
	43.99	0.216314	0.216579	0.208795					1536.33	1504.82	1403.5					332.311	325.893	292.993
	44.08	0.216354	0.216615	0.208851					1536.18	1504.72	1403.26					332.337	325.921	293.002
	44.166	0.216393	0.216648	0.208904					1536.05	1504.62	1403.1					332.363	325.948	293.011
	44.26	0.216434	0.216682	0.20896					1535.9	1504.52	1402.9					332.39	325.979	293.021
	44.349	0.216473	0.216714	0.209002					1535.76	1504.43	1402.61					332.417	326.007	293.03
	44.499	0.216536	0.21677	0.209071					1535.53	1504.27	1402.13					332.463	326.056	293.045
	44.618	0.216583	0.216816	0.209121					1535.34	1504.14	1401.64					332.501	326.097	293.056
	44.708	0.216619	0.216853	0.20916					1535.22	1504.05	1401.27					332.531	326.128	293.065
	44.798	0.216653	0.216891	0.2092					1535.09	1503.95	1400.91					332.56	326.159	293.074
	44.888	0.216685	0.216932	0.209242					1534.97	1503.85	1400.55					332.592	326.19	293.082
	44.977	0.216718	0.216962	0.209294					1534.85	1503.75	1400.24					332.624	326.22	293.09
	45.097	0.216761	0.217009	0.209352					1534.7	1503.61	1399.8					332.669	326.261	293.101
	45.153	0.216781	0.217024	0.209382					1534.63	1503.54	1399.61					332.691	326.281	293.106
	45.247	0.216817	0.217053	0.209422					1534.52	1503.43	1399.3					332.729	326.311	293.115
	45.396	0.216876	0.217092	0.209486					1534.36	1503.24	1398.86					332.789	326.357	293.128
	45.512	0.216925	0.217122	0.209543					1534.24	1503.1	1398.52					332.838	326.393	293.137
	45.606	0.216966	0.217152	0.209583					1534.15	1502.99	1398.19					332.878	326.423	293.145
	45.695	0.217005	0.217184	0.209627					1534.06	1502.88	1397.89					332.916	326.453	293.153
	45.785	0.217045	0.217221	0.209686					1533.97	1502.79	1397.53					332.954	326.482	293.16
	45.905	0.217096	0.217274	0.209782					1533.86	1502.65	1397.08					333.004	326.523	293.17
	46.055	0.217158	0.217342	0.209903					1533.71	1502.52	1396.5					333.065	326.571	293.182
	46.144	0.217194	0.217379	0.209977					1533.62	1502.43	1396.21					333.1	326.602	293.189
	46.204	0.217219	0.217403	0.210022					1533.55	1502.37	1396.02					333.124	326.623	293.194
	46.294	0.217255	0.217436	0.210089					1533.45	1502.29	1395.74					333.157	326.652	293.201
	46.444	0.217316	0.217489	0.210188					1533.28	1502.15	1395.26					333.209	326.7	293.213
	46.503	0.21734	0.217509	0.210222					1533.21	1502.1	1395.09					333.23	326.72	293.217
	46.653	0.217403	0.217565	0.210307					1533.02	1501.96	1394.72					333.279	326.773	293.228
	46.713	0.217429	0.217588	0.21033					1532.94	1501.9	1394.58					333.298	326.795	293.232
	46.833	0.217482	0.217637	0.210385					1532.78	1501.78	1394.38					333.335	326.84	293.24
	46.923	0.217522	0.217676	0.210419					1532.66	1501.7	1394.23					333.363	326.875	293.247
	47.042	0.217577	0.217725	0.210462					1532.5	1501.58	1394.11					333.397	326.923	293.253
	47.132	0.217619	0.217762	0.210491					1532.37	1501.49	1394.05					333.424	326.96	293.258
	47.222	0.217658	0.217796	0.210518					1532.24	1501.39	1393.97					333.451	326.998	293.263
	47.312	0.217697	0.217829	0.210547					1532.11	1501.3	1393.86					333.477	327.036	293.268
	47.402	0.217734	0.217859	0.210572					1531.98	1501.21	1393.68					333.505	327.076	293.272
	47.551	0.217789	0.217908	0.210615					1531.77	1501.07	1393.3					333.552	327.146	293.277
	47.641	0.217821	0.217941	0.210644					1531.65	1500.99	1393.03					333.582	327.188	293.28
	47.731	0.217853	0.217975	0.210675					1531.53	1500.9	1392.7					333.613	327.232	293.283
	47.851	0.217893	0.218027	0.210723					1531.39	1500.79	1392.23					333.657	327.29	293.288
	47.911	0.217913	0.218057	0.210749					1531.31	1500.73	1391.99					333.679	327.32	293.288
	48.03	0.21795	0.218111	0.210806					1531.17	1500.63	1391.49					333.725	327.381	293.291
	48.116	0.217978	0.218154	0.210848					1531.07	1500.55	1391.1					333.76	327.425	293.293
	48.24	0.218019	0.218221	0.210911					1530.94	1500.43	1390.52					333.811	327.489	293.296
	48.33	0.21805	0.218271	0.210952					1530.85	1500.34	1390.11					333.849	327.534	293.298
	48.45	0.218091	0.218337	0.211001					1530.73	1500.22	1389.58					333.9	327.593	293.3
	48.54	0.218126	0.218385	0.211042					1530.64	1500.12	1389.17					333.939	327.636	293.302
	48.659	0.218169	0.218448	0.2111					1530.53	1499.99	1388.78					333.99	327.692	293.302
	48.749	0.218208	0.218496	0.211149					1530.44	1499.88	1388.52					334.028	327.732	293.303
	48.839	0.218246	0.218546	0.211202					1530.35	1499.77	1388.32					334.066	327.771	293.304
	48.929	0.218286	0.218598	0.211257					1530.26	1499.65	1388.18					334.102	327.81	293.304
	49.049	0.218343	0.21867	0.211325					1530.14	1499.48	1387.98					334.15	327.855	293.305
	49.168	0.218399	0.218741	0.211393					1530.01	1499.3	1387.78					334.195	327.902	293.304
	49.288	0.218454	0.218812	0.211458					1529.87	1499.12	1387.57					334.238	327.947	293.303
	49.378	0.218496	0.21886	0.211505					1529.76	1498.98	1387.4					334.269	327.974	293.302
	49.468	0.21854	0.218909	0.211557					1529.65	1498.84	1387.24					334.299	327.999	293.302
	49.528	0.218567	0.218936	0.211592					1529.57	1498.75	1387.12					334.318	328.024	293.299
	49.648	0.218622	0.218992	0.21167					1529.41	1498.58	1386.85					334.355	328.056	293.297
	49.768	0.218674	0.219039	0.21175					1529.24	1498.41	1386.5					334.391	328.091	293.295
	49.858	0.218714	0.219072	0.211809					1529.1	1498.29	1386.15					334.417	328.116	293.293
	49.977	0.21877	0.219114	0.211881					1528.93	1498.14	1385.65					334.451	328.145	293.288
	50.101	0.218826	0.219157	0.21195					1528.74	1497.98	1385.07					334.482	328.184	293.283
	50.187	0.218861	0.219186	0.211985					1528.6	1497.88	1384.65					334.506	328.209	293.279
	50.277	0.218903	0.219215	0.21202					1528.46	1497.77	1384.2					334.529	328.235	293.275
	50.367	0.218941	0.21924	0.212054					1528.31	1497.67	1383.73					334.552	328.262	293.271
	50.427	0.21897	0.219252	0.212077					1528.22	1497.6	1383.42					334.567	328.278	293.268
	50.547	0.21902	0.219277	0.21212					1528.03	1497.45	1382.78					334.598	328.31	293.263
	50.667	0.219071	0.219301	0.212162					1527.85	1497.32	1382.12					334.632	328.343	293.257
	50.787	0.21912	0.219317	0.212205					1527.68	1497.18	1381.45					334.665	328.372	293.249
	50.907	0.219169	0.219336	0.212246					1527.52	1497.05	1380.82					334.702	328.404	293.242
	50.997	0.219203	0.219356	0.212272					1527.39	1496.95	1380.37					334.73	328.429	293.237
	51.086	0.219234	0.219378	0.212307					1527.28	1496.85	1379.96					334.757	328.457	293.23
	51.146	0.219254	0.219397	0.212319					1527.21	1496.78	1379.79					334.773	328.471	293.226
	51.266	0.219292	0.219429	0.212377					1527.06	1496.64	1379.38					334.811	328.507	293.217
	51.356	0.219319	0.219457	0.212423					1526.95	1496.53	1379.14					334.841	328.532	293.21
	51.506	0.21936	0.219505	0.212515					1526.77	1496.35	1378.84					334.889	328.573	293.198
	51.596	0.219386	0.219536	0.212572					1526.67	1496.23	1378.62					334.918	328.597	293.191
	51.712	0.21942	0.219582	0.212652					1526.53	1496.09	1378.38					334.953	328.627	293.181
	51.776	0.219439	0.219609	0.212696					1526.44	1496.01	1378.26					334.973	328.644	293.176
	51.896	0.219478	0.219664	0.212775					1526.29	1495.86	1378.07					335.007	328.677	293.165
	52.016	0.219519	0.21972	0.212846					1526.13	1495.7	1377.91					335.04	328.71	293.154
	52.076	0.219541	0.219746	0.212884					1526.05	1495.62	1377.8					335.056	328.725	293.147
	52.196	0.219586	0.21981	0.212953					1525.88	1495.46	1377.58					335.087	328.757	293.136
	52.285	0.21962	0.219861	0.213					1525.75	1495.35	1377.4					335.109	328.782	293.127
	52.376	0.219655	0.219914	0.213045					1525.61	1495.23	1377.13					335.131	328.807	293.117
	52.555	0.219721	0.220017	0.213129					1525.33	1494.98	1376.4					335.172	328.863	293.098
	52.645	0.219752	0.220065	0.213165					1525.18	1494.86	1375.98					335.191	328.885	293.088
	52.735	0.219781	0.220109	0.213198					1525.03	1494.72	1375.55					335.211	328.907	293.078
	52.825	0.21981	0.220149	0.213231					1524.88	1494.59	1375.08					335.231	328.927	293.068
	52.945	0.219848	0.220199	0.213276					1524.67	1494.38	1374.47					335.262	328.961	293.054
	52.975	0.219858	0.220209	0.213288					1524.62	1494.34	1374.32					335.267	328.966	293.051
	53.125	0.219905	0.220263	0.213354					1524.36	1494.09	1373.57					335.302	329.008	293.033
	53.219	0.219941	0.220293	0.213407					1524.2	1493.93	1373.11					335.324	329.023	293.022
	53.275	0.21996	0.220311	0.213432					1524.1	1493.81	1372.85					335.338	329.04	293.015
	53.395	0.220011	0.220353	0.213498					1523.9	1493.58	1372.25					335.367	329.062	293
	53.485	0.220048	0.220382	0.213545					1523.75	1493.4	1371.85					335.392	329.077	292.989
	53.605	0.220107	0.220419	0.213607					1523.57	1493.15	1371.34					335.424	329.092	292.974
	53.725	0.220162	0.220454	0.213668					1523.4	1492.89	1370.91					335.46	329.104	292.959
	53.845	0.220221	0.220489	0.213727					1523.22	1492.63	1370.58					335.496	329.116	292.945
	53.935	0.220266	0.220515	0.213768					1523.1	1492.43	1370.33					335.522	329.125	292.933
	54.025	0.220311	0.220538	0.213813					1522.97	1492.25	1370.09					335.549	329.132	292.922
	54.115	0.220356	0.220562	0.213855					1522.85	1492.06	1369.83					335.576	329.14	292.911
	54.205	0.220401	0.220591	0.213907					1522.73	1491.88	1369.54					335.603	329.148	292.9
	54.355	0.220474	0.220644	0.213982					1522.53	1491.58	1369.04					335.649	329.171	292.881
	54.445	0.220518	0.22068	0.214026					1522.4	1491.41	1368.73					335.675	329.181	292.869
	54.565	0.220575	0.220725	0.214082					1522.24	1491.2	1368.3					335.708	329.202	292.853
	54.689	0.220632	0.220773	0.214138					1522.07	1490.99	1367.8					335.745	329.221	292.837
	54.745	0.220658	0.220795	0.214167					1521.99	1490.89	1367.62					335.763	329.236	292.83
	54.806	0.220684	0.22082	0.214191					1521.91	1490.8	1367.31					335.779	329.246	292.821
	54.896	0.220726	0.220857	0.214233					1521.78	1490.66	1366.92					335.808	329.268	292.808
	55.016	0.220775	0.220907	0.214297					1521.61	1490.47	1366.3					335.843	329.297	292.792
	55.136	0.220822	0.220959	0.214359					1521.42	1490.31	1365.64					335.878	329.335	292.775
	55.256	0.220868	0.221012	0.21442					1521.23	1490.15	1365.1					335.912	329.38	292.757
	55.406	0.220929	0.221081	0.214497					1521	1489.99	1364.54					335.953	329.436	292.733
	55.466	0.220949	0.221109	0.214528					1520.91	1489.94	1364.34					335.97	329.464	292.723
	55.526	0.220971	0.221138	0.214561					1520.81	1489.87	1364.15					335.986	329.492	292.714
	55.616	0.221003	0.22118	0.214605					1520.67	1489.8	1363.83					336.011	329.526	292.699
	55.766	0.22105	0.22125	0.214659					1520.44	1489.67	1363.34					336.053	329.595	292.674
	55.882	0.221085	0.221307	0.214691					1520.26	1489.58	1363.01					336.085	329.648	292.655
	55.946	0.221104	0.221338	0.214703					1520.16	1489.52	1362.81					336.104	329.677	292.644
	56.066	0.221141	0.221398	0.214729					1519.99	1489.44	1362.52					336.137	329.731	292.623
	56.16	0.221169	0.221443	0.214751					1519.86	1489.37	1362.32					336.164	329.772	292.606
	56.276	0.221208	0.221495	0.214786					1519.69	1489.28	1362.11					336.195	329.822	292.586
	56.366	0.221238	0.221533	0.214822					1519.58	1489.22	1361.92					336.221	329.861	292.57
	56.517	0.22129	0.221596	0.214893					1519.37	1489.09	1361.5					336.264	329.925	292.544
	56.607	0.221324	0.221632	0.214948					1519.26	1489.01	1361.17					336.29	329.961	292.528
	56.667	0.221348	0.221658	0.214996					1519.19	1488.97	1360.96					336.307	329.979	292.517
	56.757	0.221382	0.221691	0.215053					1519.08	1488.88	1360.6					336.332	330.012	292.502
	56.907	0.221437	0.221748	0.21514					1518.9	1488.72	1359.98					336.376	330.066	292.475
	56.967	0.22146	0.22177	0.215175					1518.83	1488.64	1359.74					336.393	330.089	292.464
	57.117	0.221518	0.22182	0.215254					1518.66	1488.49	1359.12					336.436	330.144	292.438
	57.207	0.221554	0.221852	0.215306					1518.56	1488.37	1358.74					336.461	330.173	292.422
	57.297	0.221591	0.22188	0.215352					1518.46	1488.25	1358.35					336.486	330.202	292.406
	57.387	0.221628	0.221909	0.215402					1518.36	1488.14	1357.95					336.511	330.234	292.39
	57.508	0.221677	0.221947	0.215465					1518.22	1488.01	1357.42					336.544	330.279	292.369
	57.598	0.221714	0.221975	0.215512					1518.12	1487.91	1357.07					336.569	330.311	292.353
	57.688	0.221751	0.222003	0.215549					1518.02	1487.81	1356.71					336.593	330.342	292.337
	57.808	0.221798	0.222045	0.215591					1517.89	1487.68	1356.22					336.626	330.385	292.315
	57.898	0.221832	0.222078	0.215619					1517.79	1487.59	1355.87					336.651	330.416	292.298
	57.988	0.221865	0.222115	0.21564					1517.69	1487.51	1355.54					336.676	330.447	292.282
	58.108	0.221908	0.222162	0.21568					1517.56	1487.41	1355.09					336.709	330.49	292.259
	58.229	0.221952	0.222218	0.21572					1517.42	1487.3	1354.58					336.743	330.53	292.236
	58.289	0.221975	0.222245	0.21574					1517.35	1487.25	1354.32					336.759	330.551	292.225
	58.409	0.222016	0.222303	0.215787					1517.21	1487.15	1353.81					336.794	330.591	292.202
	58.499	0.222046	0.222345	0.215826					1517.11	1487.07	1353.45					336.82	330.622	292.184
	58.619	0.222087	0.222399	0.215885					1516.98	1486.99	1352.96					336.856	330.66	292.161
	58.739	0.222126	0.222446	0.215949					1516.86	1486.89	1352.46					336.893	330.698	292.138
	58.83	0.222153	0.222479	0.215997					1516.76	1486.82	1352.07					336.922	330.729	292.121
	58.916	0.222179	0.222512	0.216042					1516.67	1486.75	1351.7					336.949	330.756	292.105
	59.01	0.222206	0.222542	0.21609					1516.58	1486.67	1351.31					336.979	330.783	292.087
	59.1	0.222231	0.222574	0.216136					1516.49	1486.59	1350.96					337.008	330.812	292.07
	59.22	0.222265	0.222614	0.216201					1516.37	1486.47	1350.53					337.047	330.856	292.048
	59.34	0.222298	0.222654	0.216268					1516.26	1486.36	1350.11					337.086	330.901	292.027
	59.461	0.222334	0.22269	0.216336					1516.15	1486.28	1349.69					337.126	330.949	292.007
	59.551	0.222364	0.222715	0.216391					1516.08	1486.22	1349.4					337.156	330.988	291.993
	59.615	0.222383	0.222731	0.216427					1516.02	1486.18	1349.21					337.178	331.014	291.984
	59.735	0.222423	0.222758	0.216489					1515.92	1486.11	1348.89					337.22	331.068	291.968
	59.851	0.222462	0.222785	0.216546					1515.83	1486.06	1348.59					337.26	331.121	291.953
	59.942	0.222495	0.22281	0.21658					1515.77	1486.03	1348.31					337.292	331.162	291.944
	60.032	0.222528	0.222837	0.216615					1515.71	1486.01	1348					337.327	331.203	291.933
	60.122	0.222563	0.222868	0.21665					1515.64	1485.98	1347.66					337.363	331.244	291.926
	60.242	0.222609	0.222907	0.216695					1515.56	1485.95	1347.15					337.406	331.299	291.921
	60.332	0.222642	0.222945	0.216729					1515.51	1485.93	1346.72					337.439	331.342	291.915
	60.453	0.222687	0.223002	0.216771					1515.43	1485.91	1346.19					337.486	331.398	291.906
	60.543	0.222721	0.223044	0.216801					1515.39	1485.9	1345.78					337.525	331.438	291.909
	60.663	0.222764	0.223098	0.216841					1515.34	1485.87	1345.25					337.573	331.493	291.914
	60.753	0.222796	0.223137	0.216881					1515.29	1485.84	1344.86					337.612	331.532	291.914
	60.844	0.222828	0.223174	0.216921					1515.26	1485.81	1344.48					337.654	331.572	291.914
	60.934	0.22286	0.223211	0.216961					1515.23	1485.78	1344.12					337.696	331.611	291.92
	61.054	0.222903	0.223253	0.21703					1515.21	1485.73	1343.63					337.756	331.663	291.931
	61.144	0.222936	0.223284	0.217083					1515.19	1485.69	1343.26					337.807	331.701	291.941
	61.265	0.222982	0.223328	0.217159					1515.2	1485.61	1342.76					337.865	331.753	291.968
	61.415	0.223041	0.223379	0.217244					1515.22	1485.55	1342.22					337.952	331.82	291.991
	61.505	0.223077	0.223415	0.217289					1515.21	1485.5	1341.92					338.001	331.862	291.997
	61.595	0.22311	0.22345	0.217329					1515.24	1485.47	1341.65					338.054	331.903	292.017
	61.656	0.223134	0.223476	0.217352					1515.31	1485.43	1341.48					338.093	331.935	292.031
	61.746	0.223168	0.22351	0.217391					1515.34	1485.42	1341.18					338.154	331.978	292.064
	61.866	0.223213	0.223552	0.217443					1515.46	1485.39	1340.78					338.239	332.04	292.09
	61.986	0.223257	0.223591	0.217491					1515.58	1485.41	1340.32					338.317	332.104	292.123
	62.11	0.223301	0.223627	0.217538					1515.67	1485.47	1339.76					338.409	332.175	292.156
	62.197	0.223333	0.223652	0.217574					1515.83	1485.49	1339.35					338.477	332.232	292.185
	62.287	0.223364	0.223679	0.21762					1516.01	1485.56	1338.93					338.557	332.283	292.218
	62.347	0.223386	0.223699	0.217638					1516.08	1485.59	1338.7					338.616	332.319	292.245
	62.468	0.223428	0.223736	0.217695					1516.38	1485.67	1338.2					338.716	332.402	292.297
	62.588	0.223467	0.223774	0.217768					1516.65	1485.8	1337.82					338.838	332.487	292.339
	62.678	0.223495	0.223804	0.217832					1516.93	1485.91	1337.56					338.941	332.552	292.371
	62.799	0.223529	0.223842	0.21792					1517.38	1486.07	1337.4					339.083	332.641	292.423
	62.919	0.223558	0.223878	0.218001					1518.03	1486.22	1337.28					339.295	332.725	292.482
	62.949	0.223568	0.223885	0.218022					1518.21	1486.27	1337.3					339.342	332.748	292.501
	63.069	0.2236	0.223922	0.218096					1518.85	1486.46	1337.19					339.565	332.845	292.555
	63.163	0.223626	0.223954	0.218154					1519.4	1486.65	1337.3					339.783	332.921	292.595
	63.28	0.22365	0.223993	0.218218					1520.48	1486.87	1337.48					340.003	333.02	292.656
	63.431	0.22368	0.224042	0.218308					1522.18	1487.21	1338					340.444	333.153	292.739
	63.551	0.223705	0.224078	0.218389					1523.45	1487.55	1338.41					340.866	333.277	292.809
	63.641	0.223722	0.224103	0.218462					1524.66	1487.88	1338.74					341.137	333.384	292.856
	63.701	0.223731	0.224119	0.218505					1525.72	1488.01	1338.92					341.32	333.492	292.888
	63.822	0.223751	0.224146	0.218589					1527.45	1488.8	1339.29					341.802	333.694	292.957
	63.942	0.22377	0.22417	0.21868					1529.62	1489.53	1339.54					342.394	333.91	293.034
	64.033	0.223785	0.224188	0.218749					1531.34	1490.16	1339.64					342.779	334.125	293.09
	64.093	0.223794	0.224199	0.218795					1532.55	1491.06	1339.76					343.204	334.249	293.131
	64.213	0.223812	0.22422	0.218883					1535.4	1492.3	1339.88					343.799	334.701	293.202
	64.303	0.223825	0.224236	0.218952					1537.48	1493.83	1339.98					344.254	335.034	293.263
	64.424	0.223843	0.224258	0.219045					1540.44	1495.63	1340.07					344.982	335.553	293.34
	64.57	0.223867	0.224285	0.219163					1544.04	1498.5	1339.95					346.023	336.163	293.443
	64.635	0.223878	0.224297	0.219219					1545.98	1499.79	1339.88					346.359	336.575	293.488
	64.785	0.22391	0.224319	0.219326					1549.76	1504.31	1339.71					347.386	337.458	293.595
	64.815	0.223917	0.224323	0.219343					1550.61	1504.89	1339.66					347.552	337.721	293.616
	64.875	0.22393	0.224335	0.219385					1552.19	1506.93	1339.61					348.036	338.141	293.659
	65.026	0.223986	0.22435	0.219466					1557.2	1511.69	1339.5					349.162	339.351	293.769
	65.146	0.224031	0.224359	0.219528					1560.94	1515.48	1339.49					350.131	340.259	293.857
	65.297	0.224094	0.224375	0.219606					1565.62	1521.26	1339.54					351.329	341.5	293.969
	65.361	0.22413	0.224379	0.219642					1567.85	1523.2	1339.55					351.802	342.198	294.017
	65.417	0.224158	0.224393	0.219675					1569.54	1525.85	1339.56					352.258	342.603	294.058
	65.542	0.224239	0.22442	0.219757					1573.84	1530.61	1339.56					353.312	343.889	294.153
	65.688	0.224334	0.224476	0.219865					1578.82	1536.57	1339.48					354.531	345.259	294.263
	65.779	0.224395	0.224517	0.219937					1581.89	1540.49	1339.43					355.317	346.138	294.331
	65.839	0.224432	0.224543	0.219982					1583.93	1542.79	1339.37					355.805	346.778	294.378
	65.929	0.224499	0.224591	0.220056					1587.01	1546.66	1339.3					356.587	347.67	294.446
	66.05	0.224587	0.224666	0.220146					1591.19	1551.94	1339.21					357.633	348.935	294.535
	66.14	0.224655	0.224723	0.220209					1594.32	1555.9	1339.11					358.419	349.889	294.602
	66.321	0.224798	0.224847	0.220336					1600.51	1563.89	1338.9					359.992	351.833	294.735
	66.411	0.224875	0.224915	0.220395					1603.69	1567.88	1338.77					360.753	352.788	294.806
	66.472	0.224928	0.224956	0.220436					1605.65	1570.58	1338.68					361.303	353.447	294.847
	66.592	0.225034	0.225053	0.220516					1609.95	1575.72	1338.45					362.312	354.711	294.937
	66.652	0.225086	0.225105	0.220554					1611.71	1578.31	1338.33					362.878	355.353	294.978
	66.803	0.22522	0.225243	0.220656					1616.98	1584.79	1338.04					364.165	356.996	295.08
	66.893	0.2253	0.225326	0.220716					1619.74	1588.8	1337.91					364.909	357.983	295.144
	66.984	0.225382	0.225411	0.220776					1622.6	1593	1337.81					365.599	358.872	295.208
	67.074	0.225464	0.225494	0.22083					1625.13	1596.31	1337.73					366.316	359.824	295.269
	67.164	0.225542	0.225572	0.220879					1628.05	1599.42	1337.65					367.021	360.648	295.326
	67.289	0.225646	0.225678	0.22094					1631.57	1603.85	1337.52					368.018	361.858	295.405
	67.375	0.22572	0.225748	0.220981					1633.95	1606.48	1337.42					368.697	362.553	295.455
	67.526	0.225843	0.225862	0.221053					1638.03	1611.13	1337.31					369.604	363.865	295.545
	67.616	0.225914	0.225929	0.221101					1640.1	1613.87	1337.24					370.183	364.545	295.598
	67.677	0.225957	0.225974	0.221134					1640.91	1615.63	1337.23					370.542	364.944	295.634
	67.797	0.226045	0.226062	0.221194					1643.33	1618.29	1337.2					371.278	365.803	295.701
	67.918	0.226131	0.226151	0.221253					1645.72	1620.72	1337.2					371.906	366.472	295.765
	68.012	0.226193	0.226224	0.221295					1646.96	1622.67	1337.2					372.339	367.008	295.808
	68.099	0.226253	0.226297	0.221331					1648.68	1624.22	1337.22					372.64	367.475	295.855
	68.159	0.226293	0.22635	0.221355					1649.13	1625.22	1337.24					372.94	367.825	295.886
	68.28	0.226363	0.226452	0.221404					1650.11	1627.16	1337.26					373.288	368.391	295.943
	68.37	0.226418	0.22653	0.22144					1651.18	1628.42	1337.28					373.537	368.754	295.981
	68.49	0.226481	0.226626	0.221501					1651.93	1629.99	1337.24					373.829	369.211	296.034
	68.611	0.226549	0.226718	0.221565					1652.64	1631.35	1337.14					374.121	369.659	296.089
	68.705	0.226598	0.226784	0.221622					1652.62	1632.39	1337.04					374.308	369.979	296.128
	68.792	0.226643	0.226836	0.221679					1652.45	1633.28	1336.9					374.344	370.31	296.159
	68.943	0.226718	0.226927	0.221783					1652.45	1634.66	1336.61					374.395	370.734	296.22
	69.063	0.226775	0.226994	0.221867					1652.08	1635.63	1336.29					374.457	371.103	296.26
	69.154	0.226816	0.227037	0.221938					1651.71	1636.17	1336.05					374.44	371.293	296.291
	69.218	0.226845	0.227075	0.221985					1651.37	1636.77	1335.89					374.407	371.379	296.316
	69.334	0.226897	0.227138	0.222073					1650.61	1637.38	1335.61					374.291	371.639	296.351
	69.398	0.226925	0.227166	0.222123					1650.18	1637.44	1335.46					374.276	371.776	296.37
	69.515	0.226973	0.227214	0.222209					1649.06	1637.94	1335.2					374.14	371.921	296.404
	69.636	0.22702	0.227254	0.222299					1648.29	1638.18	1334.95					373.978	372.054	296.443
	69.727	0.227054	0.227286	0.222354					1647.33	1638.37	1334.81					373.872	372.092	296.463
	69.847	0.227095	0.227317	0.222419					1645.95	1638.14	1334.74					373.612	372.152	296.494
	69.911	0.227117	0.227331	0.222451					1645.17	1637.83	1334.66					373.481	372.191	296.509
	70.028	0.22715	0.227351	0.22252					1643.4	1637.59	1334.57					373.215	372.22	296.538
	70.122	0.227179	0.227362	0.222574					1642.4	1637.29	1334.49					372.964	372.167	296.555
	70.269	0.227222	0.227385	0.222655					1640.17	1636.14	1334.35					372.621	372.024	296.592
	70.394	0.227257	0.227404	0.222722					1638.39	1635.01	1334.18					372.249	371.847	296.607
	70.484	0.227282	0.227422	0.222764					1636.9	1634.09	1334.02					371.99	371.643	296.618
	70.571	0.227309	0.227446	0.222806					1635.49	1633.06	1333.8					371.732	371.49	296.634
	70.665	0.22734	0.227479	0.222855					1633.89	1631.67	1333.54					371.457	371.254	296.655
	70.722	0.227359	0.2275	0.222881					1632.99	1631.18	1333.29					371.272	371.026	296.657
	70.816	0.227391	0.227538	0.222933					1631.46	1629.61	1332.9					370.963	370.782	296.668
	70.933	0.227434	0.227586	0.223					1629.35	1627.64	1332.42					370.572	370.369	296.681
	71.084	0.227491	0.227649	0.223084					1626.61	1624.94	1331.75					370.031	369.858	296.697
	71.178	0.227527	0.227685	0.223124					1624.88	1623.12	1331.35					369.694	369.497	296.705
	71.295	0.227567	0.227726	0.223175					1622.65	1620.62	1330.84					369.262	369.017	296.72
	71.385	0.227599	0.227754	0.223213					1621	1618.95	1330.49					368.926	368.636	296.725
	71.506	0.22764	0.227793	0.223263					1618.68	1616.29	1330.05					368.476	368.11	296.725
	71.536	0.227651	0.227803	0.223272					1618.14	1615.54	1329.95					368.365	367.993	296.725
	71.661	0.227692	0.227844	0.223295					1615.77	1612.77	1329.56					367.886	367.425	296.729
	71.782	0.227731	0.227888	0.223318					1613.49	1609.98	1329.26					367.452	366.872	296.733
	71.902	0.227769	0.227936	0.223347					1611.13	1607.29	1328.99					367.02	366.329	296.733
	71.989	0.227797	0.22797	0.223368					1609.56	1605.34	1328.81					366.695	365.955	296.732
	72.053	0.227819	0.227992	0.223387					1608.49	1604.02	1328.7					366.476	365.664	296.73
	72.17	0.227859	0.228035	0.223417					1606.59	1601.37	1328.45					366.147	365.165	296.727
	72.294	0.227901	0.228073	0.223462					1604.49	1598.96	1328.06					365.692	364.674	296.721
	72.415	0.227944	0.228108	0.223517					1602.67	1596.73	1327.57					365.35	364.166	296.711
	72.502	0.227974	0.228133	0.223565					1601.42	1594.97	1327.21					365.161	363.833	296.708
	72.566	0.227991	0.228151	0.223596					1600.57	1593.81	1326.93					365.034	363.586	296.699
	72.687	0.228034	0.228184	0.223687					1599.1	1591.65	1326.45					364.742	363.126	296.687
	72.777	0.228067	0.228209	0.223746					1598.25	1589.94	1326.12					364.61	362.772	296.678
	72.898	0.228112	0.228241	0.223827					1596.91	1587.78	1325.67					364.38	362.329	296.666
	73.015	0.228159	0.228254	0.223905					1595.81	1585.94	1325.24					364.229	361.925	296.653
	73.075	0.22818	0.228261	0.223943					1595.51	1585.1	1325.02					364.181	361.711	296.644
	73.166	0.228217	0.228278	0.223996					1594.78	1583.51	1324.66					364.148	361.367	296.632
	73.287	0.228269	0.228273	0.224066					1594.57	1581.48	1324.13					364.1	360.956	296.616
	73.411	0.228329	0.228277	0.224133					1594.23	1579.42	1323.61					364.037	360.514	296.596
	73.532	0.228382	0.22827	0.224194					1593.99	1577.45	1323.14					364.098	360.091	296.577
	73.619	0.228426	0.228269	0.224219					1593.74	1576.09	1322.84					364.098	359.802	296.564
	73.709	0.228468	0.228269	0.224243					1593.55	1574.75	1322.56					364.12	359.517	296.548
	73.83	0.228523	0.228271	0.224276					1593.72	1573.03	1322.2					364.2	359.157	296.526
	73.921	0.228563	0.228281	0.224295					1593.95	1571.83	1321.94					364.289	358.914	296.51
	74.041	0.228614	0.228307	0.224322					1594.01	1570.41	1321.58					364.416	358.621	296.488
	74.102	0.228641	0.228321	0.224334					1594.25	1569.72	1321.41					364.474	358.496	296.476
	74.196	0.228682	0.228332	0.224367					1594.29	1568.8	1321.12					364.558	358.297	296.457
	74.283	0.228716	0.22835	0.224397					1594.25	1568	1320.88					364.591	358.134	296.44
	74.434	0.228773	0.22837	0.224447					1594.08	1566.77	1320.49					364.613	357.912	296.409
	74.559	0.228824	0.228389	0.224485					1593.58	1565.95	1320.23					364.601	357.746	296.383
	74.585	0.228831	0.228392	0.224493					1593.55	1565.75	1320.17					364.561	357.728	296.377
	74.77	0.228899	0.228426	0.224549					1592.15	1564.65	1319.81					364.324	357.536	296.338
	74.857	0.228927	0.228447	0.224579					1590.93	1564.12	1319.66					364.168	357.467	296.32
	74.948	0.22896	0.228479	0.224616					1588.91	1563.63	1319.49					363.494	357.414	296.299
	75.042	0.228995	0.228517	0.224661					1587.11	1563.15	1319.3					363.026	357.354	296.278
	75.163	0.229041	0.228565	0.224725					1579.94	1562.44	1319					361.838	357.307	296.25
	75.22	0.229062	0.228586	0.224756					1579.22	1562.2	1318.84					361.038	357.235	296.237
	75.314	0.229096	0.228626	0.224805					1573.16	1561.61	1318.51					359.265	357.167	296.216
	75.431	0.229143	0.228673	0.224861					1560.14	1560.78	1318					356.812	357.08	296.189
	75.612	0.229206	0.228744	0.224936					1543.78	1559.51	1317.05					352.16	356.956	296.146
	75.646	0.229224	0.228757	0.22495					1537.48	1559.21	1316.86					351.8	356.954	296.139
	75.767	0.229272	0.228821	0.225013					1522.56	1558.38	1316.23					348.46	356.863	296.108
	75.888	0.229314	0.228887	0.22508					1502.62	1557.6	1315.6					343.127	356.762	296.077
	75.975	0.229344	0.228935	0.225136					1483.03	1557.02	1315.18					338.901	356.79	296.056
	76.069	0.229374	0.229029	0.225197					1461.63	1556.6	1314.73					335.248	356.755	296.034
	76.19	0.229411	0.229125	0.225274					1434.66	1556.08	1314.14					328.471	356.751	296.001
	76.247	0.229429	0.229184	0.22531					1425.44	1555.87	1313.86					326.037	356.759	295.985
	76.341	0.229458	0.229274	0.225372					1405.08	1555.59	1313.37					321.7	356.779	295.96
	76.462	0.22949	0.229392	0.225447					1370.61	1555.32	1312.76					313.878	356.837	295.927
	76.579	0.229544	0.229506	0.225517					1335.32	1555.16	1312.25					306.089	356.915	295.893
	76.704	0.229657	0.229623	0.225591					1300.3	1554.97	1311.76					298.003	357.011	295.857
	76.794	0.229748	0.229704	0.225634					1274.17	1554.86	1311.47					292.052	357.065	295.832
	76.912	0.229919	0.229812	0.225691					1240.39	1554.79	1311.14					284.706	357.15	295.797
	77.002	0.230102	0.2299	0.225732					1212.29	1554.72	1310.9					278.324	357.187	295.769
	77.067	0.230242	0.229943	0.225761					1191.93	1554.4	1310.72					273.154	357.262	295.749
	77.157	0.23044	0.23002	0.225796					1164.95	1554.22	1310.45					267.11	357.275	295.721
	77.274	0.230708	0.230117	0.225834					1125.13	1553.89	1310.06					258.476	357.319	295.683
	77.365	0.230888	0.230184	0.225858					1096.27	1553.32	1309.76					251.44	357.299	295.654
	77.49	0.231356	0.23028	0.225891					1053.32	1552.35	1309.38					242.395	357.191	295.612
	77.641	0.231808	0.230367	0.225926					1002.8	1550.92	1308.93					230.944	356.967	295.561
	77.762	0.232223	0.230424	0.225949					962.305	1549.26	1308.57					221.887	356.746	295.522
	77.852	0.232521	0.230463	0.225968					931.833	1547.73	1308.28					215.152	356.458	295.49
	77.943	0.232837	0.230501	0.225989					901.597	1545.6	1307.98					208.226	355.995	295.46
	78.034	0.233192	0.230537	0.226012					871.056	1543.91	1307.61					201.708	355.509	295.429
	78.121	0.233528	0.230571	0.226048					841.853	1539.94	1307.22					194.637	354.704	295.397
	78.211	0.23386	0.230604	0.226086					810.836	1535.9	1306.84					187.752	353.024	295.366
	78.306	0.234216	0.230643	0.226128					780.409	1528.23	1306.44					180.631	351.669	295.332
	78.363	0.234432	0.230668	0.226153					759.758	1523.73	1306.2					177.073	351.229	295.31
	78.544	0.235142	0.230733	0.226231					703.314	1504.1	1305.41					163.354	346.295	295.245
	78.608	0.235392	0.230752	0.226257					684.835	1497.63	1305.11					158.866	343.785	295.221
	78.726	0.235832	0.23078	0.226306					645.869	1476.92	1304.53					150.918	339.584	295.175
	78.85	0.236262	0.230796	0.226358					604.613	1451.99	1303.92					142.523	334.4	295.127
	78.941	0.236522	0.230809	0.2264					577.839	1436.48	1303.51					135.159	330.139	295.09
	79.028	0.236808	0.230813	0.226442					555.638	1419.89	1303.16					129.972	326.485	295.055
	79.092	0.236985	0.230817	0.226472					534.282	1405.95	1302.9					127.348	323.1	295.029
	79.213	0.237266	0.230829	0.226532					501.685	1376.32	1302.44					120.003	316.458	294.979
	79.334	0.237528	0.230849	0.226598					474.633	1344.19	1302					111.768	308.722	294.929
	79.451	0.237756	0.230874	0.22666					447.621	1311.47	1301.4					105.322	301.483	294.881
	79.576	0.237931	0.230924	0.226733					420.226	1272.29	1300.76					99.2679	293.786	294.827
	79.637	0.238008	0.230943	0.226771					407.911	1256.21	1300.39					96.571	289.426	294.8
	79.697	0.238071	0.230986	0.226807					396.244	1238.64	1300.01					94.6348	285.419	294.774
	79.818	0.238185	0.231049	0.22688					375.27	1202.44	1299.31					89.7869	277.268	294.722
	79.969	0.238304	0.231119	0.226964					353.178	1157.09	1298.5					84.0128	266.916	294.654
	80.09	0.23839	0.231199	0.227025					336.24	1120.68	1297.94					80.4993	258.723	294.598
	80.211	0.238465	0.231276	0.227078					322.577	1083.1	1297.39					77.7046	250.454	294.543
	80.272	0.238504	0.231315	0.227105					319.019	1064.01	1297.09					76.1069	246.168	294.514
	80.363	0.238557	0.231388	0.227141					313.62	1035.42	1296.63					74.565	239.755	294.471
	80.484	0.238625	0.231504	0.227191					306.196	997.398	1296.04					73.3325	231.236	294.414
	80.544	0.238659	0.231566	0.227204					303.963	978.648	1295.73					72.6313	227.012	294.387
	80.665	0.238729	0.231702	0.227236					298.849	941.404	1295.24					71.4007	219.036	294.327
	80.787	0.238801	0.23185	0.227269					294.421	906.502	1294.77					70.4671	210.842	294.266
	80.847	0.238839	0.231925	0.227287					292.928	889.268	1294.57					70.1013	206.898	294.236
	80.968	0.238913	0.232081	0.227318					290.424	852.607	1294.21					69.4608	199.236	294.175
	81.055	0.238966	0.23218	0.227342					289.138	829.307	1293.97					69.1639	193.319	294.129
	81.176	0.239041	0.232318	0.227389					287.831	797.722	1293.6					68.8121	186.995	294.064
	81.297	0.239117	0.232443	0.227445					286.641	768.848	1293.14					68.5367	180.477	294
	81.388	0.239173	0.232531	0.227495					285.816	749.918	1292.74					68.3533	175.752	293.951
	81.483	0.239232	0.232608	0.227545					284.968	733.257	1292.28					68.1647	171.439	293.901
	81.539	0.239264	0.232652	0.227575					284.428	725.09	1292.01					68.078	169.134	293.868
	81.66	0.239334	0.232742	0.22764					283.443	702.633	1291.42					67.8554	164.687	293.803
	81.785	0.239401	0.232829	0.227699					282.482	684.253	1290.83					67.6344	160.418	293.733
	81.906	0.239464	0.232914	0.227751					281.507	668.203	1290.28					67.4145	156.519	293.664
	81.997	0.23951	0.23297	0.227776					280.828	659.146	1289.89					67.2746	154.296	293.611
	82.088	0.23956	0.233034	0.227805					280.169	651.489	1289.5					67.1334	152.151	293.559
	82.175	0.239609	0.233091	0.227833					279.526	645.719	1289.11					66.996	150.788	293.508
	82.3	0.239687	0.233169	0.227876					278.703	637.798	1288.52					66.8132	148.914	293.434
	82.387	0.239746	0.233224	0.227908					278.128	632.69	1288.07					66.6913	147.86	293.382
	82.538	0.239855	0.233319	0.227967					277.149	625.553	1287.23					66.4942	146.087	293.29
	82.66	0.239949	0.233396	0.228023					276.391	620.59	1286.54					66.3328	144.882	293.216
	82.724	0.24	0.233426	0.228046					276.02	618.204	1286.19					66.2462	144.323	293.178
	82.815	0.240072	0.233487	0.228079					275.477	614.982	1285.73					66.1345	143.612	293.12
	82.936	0.240166	0.233566	0.228118					274.768	611.023	1285.09					65.9821	142.708	293.042
	82.996	0.240211	0.233606	0.228137					274.421	609.251	1284.77					65.911	142.272	293.003
	83.118	0.240297	0.233682	0.22819					273.733	605.653	1284.13					65.7643	141.492	292.926
	83.239	0.240376	0.233749	0.228247					273.044	602.394	1283.54					65.6207	140.747	292.845
	83.329	0.240432	0.233795	0.228294					272.542	600.173	1283.08					65.5129	140.248	292.785
	83.42	0.240487	0.233831	0.228343					272.032	597.882	1282.63					65.4079	139.747	292.722
	83.511	0.24054	0.233854	0.228391					271.526	595.705	1282.18					65.3027	139.249	292.66
	83.602	0.240594	0.233869	0.228438					271.029	593.577	1281.71					65.1967	138.749	292.601
	83.723	0.240666	0.2339	0.228485					270.366	590.589	1281.06					65.0566	138.059	292.515
	83.844	0.240742	0.233917	0.228525					269.702	587.402	1280.45					64.9168	137.328	292.433
	83.966	0.240822	0.233938	0.228561					269.033	583.952	1279.87					64.7754	136.538	292.345
	84.087	0.240904	0.233948	0.228599					268.372	580.148	1279.27					64.6354	135.684	292.259
	84.147	0.240945	0.233953	0.22862					268.045	578.266	1279.01					64.5664	135.237	292.214
	84.269	0.24103	0.23396	0.228666					267.382	574.032	1278.4					64.4242	134.269	292.126
	84.36	0.241092	0.233963	0.228696					266.89	570.8	1277.9					64.3195	133.464	292.061
	84.45	0.241155	0.233972	0.228729					266.405	567.113	1277.38					64.2156	132.706	291.995
	84.541	0.241212	0.233973	0.228757					265.918	563.404	1276.82					64.1106	131.868	291.927
	84.632	0.241269	0.233999	0.228788					265.431	559.755	1276.25					64.0066	131.003	291.859
	84.753	0.241338	0.234056	0.228832					264.792	554.525	1275.47					63.8687	129.779	291.768
	84.844	0.241385	0.234108	0.228865					264.313	550.325	1274.9					63.7656	128.92	291.701
	84.962	0.241442	0.234206	0.228905					263.699	545.254	1274.19					63.6332	127.772	291.611
	85.083	0.241495	0.234333	0.228942					263.074	540.097	1273.5					63.4988	126.564	291.519
	85.178	0.241534	0.234444	0.228969					262.592	535.731	1272.95					63.3935	125.627	291.446
	85.269	0.241571	0.234566	0.228997					262.122	531.778	1272.42					63.2932	124.714	291.374
	85.359	0.241605	0.234713	0.229027					261.674	527.916	1271.87					63.1967	123.851	291.304
	85.481	0.241652	0.2349	0.229083					261.062	522.633	1271.1					63.066	122.69	291.208
	85.541	0.241677	0.234991	0.229111					260.773	520.1	1270.7					63.0011	122.119	291.159
	85.662	0.241719	0.235178	0.229192					260.181	515.061	1269.91					62.8736	120.953	291.063
	85.753	0.241754	0.235301	0.229257					259.741	510.901	1269.33					62.7784	120.079	290.991
	85.875	0.241793	0.235465	0.229348					259.147	505.418	1268.56					62.6513	118.77	290.892
	85.966	0.241819	0.235581	0.229412					258.704	500.817	1268					62.558	117.767	290.818
	86.087	0.241858	0.235726	0.229485					258.135	494.525	1267.28					62.4316	116.39	290.72
	86.239	0.241907	0.235881	0.229556					257.397	485.914	1266.39					62.2711	114.488	290.595
	86.329	0.241937	0.235971	0.229588					256.958	480.751	1265.87					62.174	113.328	290.521
	86.451	0.241984	0.236093	0.229625					256.352	473.35	1265.15					62.0403	111.645	290.418
	86.508	0.242006	0.236156	0.229641					256.063	469.814	1264.81					61.9768	110.813	290.372
	86.599	0.242043	0.236246	0.229656					255.592	463.881	1264.32					61.8743	109.51	290.294
	86.693	0.242082	0.236332	0.229674					255.096	457.747	1263.82					61.7656	108.137	290.216
	86.815	0.242127	0.236461	0.229688					254.445	449.756	1263.23					61.6178	106.362	290.112
	86.936	0.242181	0.236594	0.229697					253.773	441.99	1262.62					61.4648	104.616	290.008
	87.027	0.242219	0.236723	0.2297					253.251	436.233	1262.12					61.3488	103.326	289.929
	87.087	0.242247	0.236804	0.229709					252.885	432.521	1261.8					61.2746	102.488	289.876
	87.209	0.242302	0.236968	0.229723					252.157	425.191	1261.11					61.1185	100.841	289.768
	87.33	0.242356	0.23717	0.229736					251.418	418.293	1260.45					60.9553	99.2498	289.662
	87.421	0.242399	0.237334	0.229764					250.875	413.261	1259.95					60.8353	98.1792	289.58
	87.482	0.242428	0.23744	0.229789					250.49	410.253	1259.61					60.7409	97.4319	289.524
	87.603	0.242489	0.237674	0.229857					249.719	404.214	1258.94					60.5699	96.0986	289.416
	87.72	0.242551	0.237906	0.22994					248.942	398.884	1258.23					60.4073	94.9333	289.31
	87.815	0.242608	0.238094	0.230012					248.317	394.863	1257.64					60.271	94.0314	289.223
	87.967	0.242705	0.238392	0.230127					247.336	388.956	1256.68					60.042	92.6335	289.082
	88.028	0.242748	0.238513	0.230163					246.909	386.633	1256.3					59.9574	92.1593	289.025
	88.119	0.242815	0.238687	0.23022					246.306	382.995	1255.73					59.8244	91.4668	288.941
	88.244	0.242913	0.238916	0.230285					245.476	378.777	1254.93					59.6421	90.3473	288.824
	88.331	0.242986	0.239073	0.230329					244.896	375.373	1254.37					59.5189	89.8253	288.742
	88.452	0.243083	0.239251	0.230384					244.107	371.658	1253.61					59.3432	88.8723	288.625
	88.574	0.243178	0.23937	0.230435					243.31	367.825	1252.83					59.1653	87.9374	288.507
	88.604	0.243201	0.239414	0.230447					243.103	366.946	1252.64					59.122	87.7309	288.48
	88.756	0.24332	0.239547	0.230513					242.099	361.779	1251.66					58.9055	86.779	288.332
	88.816	0.243362	0.239575	0.23054					241.712	360.673	1251.28					58.8188	86.3395	288.275
	88.907	0.243434	0.239616	0.230578					241.118	358.47	1250.73					58.6917	85.8676	288.186
	89.029	0.24353	0.239661	0.230624					240.327	356.418	1249.96					58.5196	85.4133	288.066
	89.12	0.243602	0.239691	0.230661					239.738	354.83	1249.4					58.3917	85.0621	287.974
	89.241	0.243704	0.239728	0.230717					238.952	352.772	1248.63					58.22	84.7623	287.855
	89.363	0.243805	0.239766	0.230779					238.155	351.307	1247.82					58.0455	84.4154	287.732
	89.484	0.243907	0.239798	0.230846					237.348	350.964	1246.99					57.8709	84.267	287.608
	89.575	0.243976	0.239824	0.230892					236.739	351	1246.37					57.7364	84.2708	287.515
	89.696	0.244071	0.239858	0.230953					235.913	351.076	1245.56					57.5575	84.3277	287.389
	89.757	0.244122	0.239874	0.230971					235.497	351.386	1245.19					57.467	84.3257	287.329
	89.848	0.244188	0.239903	0.23101					234.89	351.622	1244.63					57.3306	84.4017	287.235
	89.97	0.24428	0.239945	0.231038					234.052	352.444	1243.88					57.1465	84.6064	287.107
	90.061	0.244347	0.239979	0.231056					233.438	353.114	1243.28					57.0087	84.7801	287.013
	90.152	0.24441	0.240012	0.231072					232.793	353.827	1242.66					56.8666	84.9505	286.911
	90.269	0.244486	0.240056	0.231094					231.983	354.762	1241.82					56.6896	85.1936	286.78
	90.364	0.244545	0.240096	0.231113					231.331	355.56	1241.11					56.5499	85.3975	286.672
	90.486	0.244609	0.240148	0.231139					230.499	356.622	1240.2					56.3702	85.6615	286.533
	90.576	0.244655	0.240187	0.231159					229.89	357.428	1239.55					56.2323	85.8711	286.431
	90.698	0.244713	0.240239	0.231189					229.073	358.553	1238.72					56.0538	86.1513	286.292
	90.759	0.244741	0.240262	0.231201					228.669	359.134	1238.31					55.9699	86.2961	286.222
	90.91	0.244814	0.240334	0.231237					227.691	360.601	1237.31					55.7556	86.6677	286.049
	91.002	0.244862	0.240376	0.231261					227.094	361.502	1236.68					55.6275	86.8942	285.944
	91.093	0.244916	0.240411	0.231289					226.541	362.479	1236.02					55.5013	87.1333	285.84
	91.184	0.24497	0.240446	0.231325					225.996	363.385	1235.36					55.3802	87.3778	285.736
	91.275	0.245026	0.24048	0.231369					225.436	364.381	1234.64					55.2601	87.6137	285.632
	91.396	0.245118	0.240521	0.231432					224.747	365.714	1233.75					55.1093	87.9415	285.492
	91.518	0.245207	0.24056	0.231494					224.05	367.063	1232.93					54.9602	88.2769	285.352
	91.609	0.245284	0.240587	0.231539					223.556	368.083	1232.37					54.8506	88.5349	285.248
	91.7	0.245353	0.240612	0.23158					223.066	369.092	1231.82					54.744	88.79	285.143
	91.791	0.245431	0.240633	0.231619					222.585	370.132	1231.25					54.6392	89.0426	285.038
	91.882	0.245506	0.24065	0.231649					222.107	371.16	1230.65					54.5353	89.3007	284.933
	92.004	0.245609	0.240665	0.231689					221.474	372.581	1229.84					54.3975	89.6495	284.793
	92.125	0.245713	0.240671	0.231725					220.852	374.006	1229.02					54.2616	89.9951	284.653
	92.277	0.245844	0.240671	0.23177					220.073	375.836	1227.97					54.0913	90.439	284.479
	92.311	0.245872	0.240674	0.231781					219.899	376.23	1227.74					54.0531	90.5362	284.438
	92.398	0.245946	0.240675	0.231813					219.454	377.263	1227.15					53.9556	90.7945	284.337
	92.554	0.246077	0.240678	0.231872					218.653	379.149	1226.08					53.7807	91.2514	284.158
	92.646	0.246152	0.240683	0.23191					218.18	380.258	1225.4					53.677	91.5265	284.053
	92.733	0.24622	0.240688	0.231947					217.733	381.305	1224.71					53.5791	91.786	283.951
	92.824	0.246296	0.240694	0.231986					217.263	382.395	1223.96					53.4766	92.0571	283.845
	92.945	0.246388	0.240697	0.232043					216.639	383.843	1222.89					53.3394	92.4176	283.705
	93.006	0.246439	0.240697	0.232076					216.322	384.574	1222.37					53.2708	92.5998	283.637
	93.128	0.24652	0.240698	0.232138					215.69	386.036	1221.31					53.1337	92.9641	283.489
	93.219	0.246579	0.240702	0.232187					215.221	387.131	1220.54					53.0286	93.2353	283.389
	93.31	0.246638	0.240716	0.232241					214.747	388.222	1219.79					52.927	93.5069	283.28
	93.432	0.246687	0.24073	0.232292					214.113	389.692	1218.84					52.7879	93.8724	283.139
	93.492	0.246712	0.240752	0.232323					213.803	390.408	1218.4					52.7199	94.0507	283.07
	93.614	0.246764	0.240783	0.232384					213.171	391.876	1217.39					52.5811	94.4149	282.925
	93.739	0.246818	0.240837	0.232439					212.514	393.375	1216.41					52.4392	94.7887	282.781
	93.827	0.246856	0.240888	0.23247					212.053	394.429	1215.72					52.3381	95.0547	282.677
	93.918	0.246894	0.240938	0.232497					211.585	395.524	1215.04					52.235	95.3232	282.573
	94.039	0.246949	0.240999	0.232521					210.951	396.981	1214.15					52.0975	95.687	282.427
	94.161	0.246997	0.241061	0.232544					210.315	398.446	1213.29					51.9571	96.0523	282.284
	94.252	0.247038	0.241108	0.232567					209.84	399.504	1212.66					51.8536	96.3218	282.178
	94.313	0.247062	0.241142	0.232583					209.541	400.25	1212.26					51.7867	96.5073	282.111
	94.434	0.24711	0.241203	0.232612					208.905	401.728	1211.44					51.6471	96.8649	281.966
	94.556	0.247155	0.241272	0.232653					208.254	403.17	1210.62					51.5125	97.2218	281.824
	94.617	0.247184	0.241295	0.232667					207.954	403.899	1210.23					51.4401	97.4012	281.753
	94.773	0.247245	0.241391	0.232713					207.149	405.728	1209.13					51.2636	97.868	281.57
	94.803	0.247253	0.241409	0.232729					206.998	406.086	1208.93					51.2265	97.9606	281.531
	94.955	0.24731	0.241494	0.232758					206.202	407.887	1207.98					51.0547	98.4205	281.359
	95.046	0.247359	0.241537	0.232785					205.73	408.922	1207.2					50.957	98.684	281.249
Inflection Temperatures (ratio)
Capillary label		Ti [°C]	Ratio @ Ti
KIF13A		67.0514	0.225443
		78.345	0.234364
		90.743	0.244734
Affected NONHSAT002007		67.6072	0.225923
		81.4943	0.232617
		86.9537	0.236619
Unaffected NONHSAT002007		64.8136	0.219342

## Sheet: Profiles_derivative
	Signal:	First derivative (ratio)							First derivative (330 nm)							First derivative (350 nm)
	Capillary:	1	2	3					1	2	3					1	2	3
	Temperature [°C]	KIF13A	Affected NONHSAT002007	Unaffected NONHSAT002007					KIF13A	Affected NONHSAT002007	Unaffected NONHSAT002007					KIF13A	Affected NONHSAT002007	Unaffected NONHSAT002007
	35.15	0.000375276	0.000257025	0.000330219					-0.983088	-0.392947	-2.90812					0.363198	0.400323	0.246958
	35.269	0.000376809	0.000262887	0.000336987					-0.988827	-0.416307	-2.83612					0.362467	0.399012	0.246728
	35.419	0.000378573	0.00027019	0.000345441					-0.996199	-0.446493	-2.74618					0.36153	0.39725	0.246438
	35.538	0.000379834	0.000275931	0.000352097					-1.00216	-0.47108	-2.67544					0.360772	0.395757	0.246207
	35.717	0.000381499	0.000284484	0.000362026					-1.01134	-0.509149	-2.57011					0.359608	0.393345	0.245861
	35.836	0.000382449	0.00029013	0.000368579					-1.01758	-0.535182	-2.50078					0.358818	0.391625	0.245631
	35.926	0.000383088	0.00029438	0.000373507					-1.02238	-0.555292	-2.44858					0.35821	0.390258	0.245457
	36.015	0.000383654	0.000298553	0.000378338					-1.02715	-0.575373	-2.3975					0.357607	0.388862	0.245287
	36.131	0.000384298	0.000303962	0.000384585					-1.0335	-0.602189	-2.33078					0.356803	0.386944	0.245062
	36.22	0.000384725	0.000308092	0.000389337					-1.03842	-0.623049	-2.27987					0.356181	0.385416	0.244892
	36.31	0.0003851	0.00031226	0.000394114					-1.04345	-0.644448	-2.22839					0.355544	0.383814	0.244719
	36.399	0.000385422	0.000316376	0.00039881					-1.04848	-0.665884	-2.17744					0.354907	0.382176	0.244548
	36.493	0.000385713	0.000320713	0.000403729					-1.05384	-0.68884	-2.12348					0.354226	0.380386	0.244367
	36.642	0.000386094	0.000327588	0.000411456					-1.06243	-0.725753	-2.03777					0.353132	0.37744	0.24408
	36.701	0.000386223	0.000330322	0.000414502					-1.06585	-0.740536	-2.00379					0.352694	0.376238	0.243967
	36.847	0.00038651	0.000337084	0.00042196					-1.0744	-0.777524	-1.9197					0.351598	0.373186	0.243686
	36.91	0.000386627	0.000340014	0.000425156					-1.07812	-0.793668	-1.88352					0.351118	0.371836	0.243564
	37.03	0.000386853	0.000345619	0.000431212					-1.08525	-0.824727	-1.81529					0.350195	0.369219	0.243331
	37.119	0.000387037	0.000349798	0.000435675					-1.09061	-0.84818	-1.76581					0.349498	0.367227	0.243158
	37.238	0.000387321	0.000355422	0.000441614					-1.09799	-0.880745	-1.70291					0.348535	0.364425	0.242925
	37.298	0.000387489	0.000358273	0.000444597					-1.10188	-0.898105	-1.67372					0.348026	0.362899	0.242807
	37.418	0.000387887	0.000364015	0.00045056					-1.11065	-0.940641	-1.65649					0.346767	0.35881	0.242568
	37.503	0.00038823	0.000368108	0.000454781					-1.11696	-0.974528	-1.6803					0.34575	0.355618	0.24239
	37.626	0.000388823	0.000374075	0.000460913					-1.1255	-1.02096	-1.71083					0.344373	0.351581	0.242128
	37.716	0.000389334	0.000378465	0.000465429					-1.13164	-1.05454	-1.73309					0.34339	0.34877	0.241934
	37.806	0.000389898	0.000382866	0.000469982					-1.13767	-1.08873	-1.76284					0.342399	0.345999	0.241735
	37.865	0.000390287	0.00038575	0.000472992					-1.14133	-1.11152	-1.79247					0.341745	0.344304	0.241595
	38.018	0.00039125	0.000393168	0.00048089					-1.15065	-1.17049	-1.86312					0.340091	0.340045	0.241215
	38.134	0.000391717	0.000398634	0.000486931					-1.15652	-1.21312	-1.91911					0.338943	0.337594	0.240871
	38.223	0.000391979	0.00040275	0.000490364					-1.16056	-1.24414	-1.95339					0.338141	0.336112	0.240571
	38.313	0.000392147	0.000406762	0.000493475					-1.16428	-1.27378	-1.97907					0.337403	0.334975	0.240228
	38.373	0.000392542	0.000409301	0.000494214					-1.16652	-1.29221	-1.99104					0.336962	0.334482	0.239971
	38.522	0.000392357	0.000415229	0.000498529					-1.17136	-1.33216	-2.00409					0.336069	0.334358	0.239201
	38.641	0.000391916	0.000419441	0.00050098					-1.17414	-1.35417	-1.99967					0.335668	0.336154	0.238366
	38.731	0.000392109	0.000422036	0.000501296					-1.1773	-1.37531	-2.00175					0.335202	0.336449	0.237779
	38.791	0.000391016	0.000423974	0.000502874					-1.17875	-1.38357	-2.00086					0.335063	0.337804	0.237265
	38.91	0.000390771	0.000426662	0.000503024					-1.18128	-1.39057	-2.0036					0.335023	0.342207	0.235993
	39.03	0.000390386	0.000428747	0.000503146					-1.18477	-1.40304	-2.02883					0.334757	0.345479	0.234775
	39.119	0.00038909	0.000430415	0.000503684					-1.18714	-1.40378	-2.05666					0.334754	0.349459	0.233632
	39.239	0.000388298	0.000431809	0.000504039					-1.19061	-1.39995	-2.11087					0.334805	0.355606	0.231902
	39.328	0.000387404	0.000432767	0.000504525					-1.19352	-1.39316	-2.16183					0.334884	0.360743	0.230451
	39.418	0.000386405	0.000433649	0.000505152					-1.19684	-1.38364	-2.22076					0.334975	0.366258	0.228848
	39.507	0.000385394	0.000434451	0.00050589					-1.2005	-1.37223	-2.2839					0.335065	0.371891	0.227141
	39.597	0.000383706	0.000435784	0.000506232					-1.20603	-1.35557	-2.34612					0.33514	0.377653	0.225026
	39.716	0.00038365	0.000435838	0.000508256					-1.21177	-1.33778	-2.43239					0.335206	0.385091	0.222485
	39.866	0.000383099	0.000436501	0.00051032					-1.22372	-1.31064	-2.52263					0.335051	0.392901	0.218479
	39.955	0.000383296	0.000436414	0.000511801					-1.2311	-1.29543	-2.56687					0.334904	0.397053	0.216037
	40.015	0.000383174	0.000437412	0.000512112					-1.23665	-1.2856	-2.59129					0.334749	0.399424	0.214306
	40.135	0.000384125	0.000437203	0.000513863					-1.247	-1.26483	-2.62498					0.334542	0.404536	0.210883
	40.254	0.000385555	0.000437153	0.000515142					-1.26106	-1.24823	-2.64088					0.333922	0.406813	0.207026
	40.344	0.000387001	0.000436903	0.000515883					-1.27277	-1.2375	-2.64347					0.33331	0.407513	0.20397
	40.433	0.000388754	0.000436602	0.000516439					-1.28525	-1.22872	-2.64057					0.33257	0.407291	0.200837
	40.493	0.000390279	0.000436754	0.00051695					-1.29661	-1.23183	-2.64786					0.331498	0.403774	0.198425
	40.642	0.000393761	0.000435021	0.000516782					-1.31739	-1.21511	-2.62616					0.330338	0.403571	0.193116
	40.728	0.000396129	0.000434145	0.000516588					-1.33246	-1.21754	-2.62962					0.328962	0.399196	0.189713
	40.848	0.000399147	0.000431959	0.000515314					-1.35256	-1.2165	-2.63239					0.327287	0.394394	0.185013
	40.911	0.000400865	0.000430937	0.000514648					-1.36313	-1.21285	-2.63639					0.326524	0.392687	0.182544
	41.061	0.000405237	0.000428753	0.000513025					-1.38882	-1.2219	-2.67293					0.324022	0.383452	0.176474
	41.15	0.000407529	0.000426991	0.000511465					-1.4043	-1.22407	-2.70865					0.322644	0.378804	0.172853
	41.24	0.000409637	0.000425002	0.000509568					-1.41909	-1.23129	-2.75062					0.321167	0.372799	0.1692
	41.33	0.000411552	0.000422879	0.00050744					-1.43213	-1.24085	-2.79073					0.319794	0.366334	0.165625
	41.449	0.000413538	0.000419896	0.000504341					-1.45092	-1.25172	-2.86271					0.317898	0.358074	0.160819
	41.539	0.00041511	0.000417469	0.00050194					-1.46336	-1.26154	-2.90933					0.316593	0.351557	0.157286
	41.625	0.000416256	0.000414882	0.000499558					-1.47434	-1.27104	-2.9478					0.315435	0.345374	0.153977
	41.748	0.000417339	0.00041158	0.000496632					-1.48661	-1.28227	-2.97868					0.31419	0.337507	0.149505
	41.838	0.000417901	0.000409453	0.000494937					-1.49583	-1.29087	-2.99566					0.313227	0.331611	0.146255
	41.957	0.00041835	0.000405754	0.000492934					-1.50818	-1.30421	-3.00549					0.311857	0.323244	0.141979
	42.047	0.000418451	0.000403313	0.000492065					-1.51519	-1.31196	-2.99234					0.311101	0.317816	0.138953
	42.137	0.000418383	0.000401045	0.000491686					-1.52067	-1.31752	-2.96582					0.310536	0.313184	0.136089
	42.252	0.000418024	0.000398008	0.000491863					-1.52671	-1.32371	-2.91981					0.309901	0.307672	0.132562
	42.346	0.000417727	0.000396487	0.000492316					-1.52838	-1.32129	-2.87068					0.30987	0.3057	0.130073
	42.436	0.000417292	0.000394768	0.000492948					-1.5294	-1.31804	-2.82368					0.309902	0.304207	0.127809
	42.555	0.000416728	0.000393074	0.000493493					-1.53199	-1.3191	-2.76469					0.309678	0.300612	0.124638
	42.675	0.000415998	0.000390841	0.000494236					-1.53067	-1.31056	-2.71319					0.310086	0.300278	0.121996
	42.764	0.000415536	0.000389556	0.00049423					-1.53095	-1.30931	-2.67698					0.310139	0.298416	0.119743
	42.884	0.000414985	0.000387922	0.000493687					-1.52653	-1.29586	-2.65075					0.311055	0.299949	0.117513
	43.003	0.000414524	0.000386387	0.000492352					-1.52138	-1.28306	-2.63727					0.312097	0.301414	0.115314
	43.033	0.00041446	0.000386024	0.000492089					-1.52033	-1.28001	-2.63072					0.312318	0.301662	0.11466
	43.149	0.00041422	0.000384606	0.000490363					-1.51351	-1.26458	-2.63039					0.313688	0.304121	0.112689
	43.269	0.000414095	0.000383143	0.000488394					-1.50396	-1.24905	-2.65737					0.315567	0.306962	0.111083
	43.362	0.000414077	0.000382021	0.000487055					-1.49556	-1.23835	-2.68586					0.317216	0.308915	0.109933
	43.482	0.000414146	0.000380627	0.000485866					-1.48408	-1.22432	-2.72021					0.319494	0.311514	0.108457
	43.572	0.000413929	0.000379582	0.000487242					-1.47524	-1.21221	-2.74075					0.321278	0.313885	0.107348
	43.661	0.000414435	0.000378757	0.000485573					-1.46551	-1.20351	-2.76769					0.323212	0.315488	0.1064
	43.747	0.00041461	0.000377994	0.000486291					-1.45505	-1.19926	-2.79766					0.325257	0.316037	0.105584
	43.901	0.000414936	0.000376961	0.000489062					-1.43658	-1.18843	-2.83466					0.328922	0.317786	0.104082
	43.99	0.000414989	0.000376684	0.000492404					-1.42544	-1.18376	-2.85404					0.33112	0.318388	0.103263
	44.08	0.000415361	0.000376389	0.000493885					-1.41459	-1.17788	-2.86936					0.333261	0.319274	0.102457
	44.166	0.000415558	0.000376376	0.000496663					-1.40329	-1.17538	-2.88821					0.335463	0.319295	0.101719
	44.26	0.000415743	0.000376579	0.000500104					-1.38965	-1.17466	-2.91677					0.338112	0.31868	0.100898
	44.349	0.000415923	0.000376922	0.000503297					-1.37834	-1.17067	-2.93673					0.340289	0.31896	0.100163
	44.499	0.000416256	0.000377807	0.000508608					-1.35802	-1.16516	-2.98449					0.344165	0.318925	0.0989126
	44.618	0.000416404	0.00037859	0.000512259					-1.3415	-1.15902	-3.03125					0.34727	0.319167	0.097891
	44.708	0.000416522	0.000379199	0.000514716					-1.32949	-1.15534	-3.06744					0.349481	0.319225	0.0971683
	44.798	0.000416743	0.000379678	0.000516248					-1.31724	-1.15182	-3.10951					0.351714	0.31923	0.0964389
	44.888	0.000416632	0.000380205	0.000518488					-1.30499	-1.14437	-3.14603					0.353876	0.320058	0.0956287
	44.977	0.000416579	0.000380532	0.000519783					-1.29303	-1.13812	-3.1821					0.355944	0.32071	0.0948435
	45.097	0.000416401	0.000380728	0.000520661					-1.27662	-1.13141	-3.23556					0.358752	0.321255	0.0937823
	45.153	0.000416247	0.000380736	0.000520835					-1.26976	-1.12496	-3.23865					0.359783	0.322366	0.0932283
	45.247	0.000415834	0.000380659	0.000521237					-1.25793	-1.11672	-3.24951					0.361569	0.323702	0.0923083
	45.396	0.000415208	0.000380257	0.000517569					-1.23995	-1.10358	-3.24202					0.364058	0.326153	0.0907687
	45.512	0.000414305	0.00037991	0.000516161					-1.22674	-1.09313	-3.21403					0.365691	0.328419	0.0894883
	45.606	0.000413397	0.000379863	0.000513292					-1.21593	-1.08521	-3.18706					0.36703	0.330189	0.0884118
	45.695	0.000412525	0.000379529	0.000511904					-1.20854	-1.07497	-3.12286					0.3674	0.333277	0.0872699
	45.785	0.000411453	0.000379585	0.000509401					-1.19936	-1.06643	-3.0772					0.368332	0.335607	0.0861337
	45.905	0.000409848	0.000380008	0.000506089					-1.19153	-1.05299	-2.98739					0.368303	0.34058	0.0844035
	46.055	0.000407591	0.000381354	0.000502259					-1.18231	-1.03628	-2.89066					0.368301	0.347111	0.0821245
	46.144	0.000406147	0.000382706	0.000500294					-1.1783	-1.026	-2.83982					0.368007	0.351606	0.0806646
	46.204	0.000404898	0.000384529	0.000498822					-1.17499	-1.01783	-2.80313					0.367986	0.354631	0.0797187
	46.294	0.000403682	0.000385932	0.000497684					-1.17387	-1.0086	-2.77559					0.367125	0.360097	0.0780236
	46.444	0.000401324	0.000390417	0.000495865					-1.17302	-0.993605	-2.7549					0.365726	0.369635	0.0750642
	46.503	0.000400484	0.000392474	0.000495328					-1.17188	-0.985338	-2.73823					0.36534	0.373443	0.0739891
	46.653	0.000398706	0.000398152	0.000494233					-1.17317	-0.970684	-2.74574					0.363751	0.383821	0.0708382
	46.713	0.000397989	0.000402021	0.000494086					-1.17357	-0.963134	-2.74211					0.363086	0.388133	0.0696351
	46.833	0.000397243	0.000407372	0.000493495					-1.17695	-0.955197	-2.76957					0.36154	0.396831	0.0668644
	46.923	0.000396992	0.000411958	0.000493164					-1.18018	-0.951689	-2.79427					0.360355	0.403327	0.0646649
	47.042	0.000397353	0.000418522	0.000493168					-1.18526	-0.952773	-2.83405					0.358941	0.411614	0.0614824
	47.132	0.000397889	0.000423187	0.000493015					-1.18904	-0.954339	-2.85166					0.357862	0.417735	0.059056
	47.222	0.000398736	0.000427778	0.000492936					-1.19289	-0.957969	-2.86286					0.356834	0.42361	0.056546
	47.312	0.000399768	0.000432188	0.000492775					-1.1967	-0.963968	-2.86779					0.355911	0.42915	0.0539322
	47.402	0.000400699	0.000436471	0.000492087					-1.20039	-0.971541	-2.8649					0.355043	0.434362	0.0512583
	47.551	0.000402701	0.000443072	0.000490842					-1.20594	-0.988667	-2.84772					0.353957	0.441886	0.046608
	47.641	0.000404603	0.000446038	0.000491023					-1.2093	-1.00046	-2.83489					0.353272	0.446062	0.0437597
	47.731	0.000406151	0.000448736	0.000490294					-1.21204	-1.01456	-2.82074					0.35297	0.449365	0.040747
	47.851	0.00040844	0.000450765	0.000489786					-1.21459	-1.03546	-2.79878					0.353087	0.452061	0.0365492
	47.911	0.000409041	0.000452348	0.000488024					-1.2153	-1.04659	-2.78641					0.353383	0.452319	0.0343805
	48.03	0.000410886	0.000452534	0.000486767					-1.21837	-1.06781	-2.794					0.353379	0.454445	0.030198
	48.116	0.00041158	0.000453511	0.00048406					-1.21988	-1.08398	-2.8039					0.353731	0.454374	0.0270704
	48.24	0.000412627	0.000452342	0.000481491					-1.22253	-1.10741	-2.84679					0.354259	0.454366	0.0225162
	48.33	0.000413048	0.000450942	0.000479464					-1.22391	-1.12482	-2.88262					0.354879	0.452417	0.0191531
	48.45	0.000413211	0.000447155	0.000477219					-1.22541	-1.1482	-2.93845					0.355745	0.446683	0.01466
	48.54	0.000413011	0.00044562	0.000475427					-1.22714	-1.16535	-2.99704					0.35638	0.443646	0.0112729
	48.659	0.000412359	0.000440662	0.000473925					-1.22911	-1.1879	-3.07473					0.35701	0.434679	0.00684865
	48.749	0.000411749	0.000438457	0.000473574					-1.23087	-1.20449	-3.13716					0.357416	0.427856	0.00351107
	48.839	0.000410827	0.000433902	0.000473369					-1.23272	-1.22062	-3.19811					0.357716	0.420282	0.000195663
	48.929	0.000410042	0.00043153	0.000474509					-1.23466	-1.23614	-3.25577					0.357874	0.411983	-0.00308986
	49.049	0.000408951	0.000427772	0.000477062					-1.23698	-1.25638	-3.31465					0.358088	0.40102	-0.00745771
	49.168	0.000407518	0.000421868	0.00047921					-1.23986	-1.27377	-3.37418					0.357594	0.387725	-0.0116649
	49.288	0.000406615	0.000417903	0.000483155					-1.24386	-1.28673	-3.44226					0.356179	0.373032	-0.0157632
	49.378	0.000405888	0.000414426	0.000485908					-1.24669	-1.29544	-3.47787					0.35503	0.362528	-0.0188186
	49.468	0.000404978	0.000410793	0.000488407					-1.24979	-1.30234	-3.50975					0.353579	0.352009	-0.0218276
	49.528	0.00040458	0.000408823	0.000490356					-1.25279	-1.30355	-3.53994					0.352023	0.345081	-0.0237528
	49.648	0.000404451	0.000405291	0.000494571					-1.25619	-1.31308	-3.55608					0.350155	0.331064	-0.0277716
	49.768	0.000403133	0.000402215	0.000497835					-1.26195	-1.31425	-3.59186					0.346832	0.317669	-0.0315999
	49.858	0.000403361	0.000399757	0.00050063					-1.26776	-1.30977	-3.6161					0.34344	0.309218	-0.034363
	49.977	0.000403523	0.00039643	0.000503774					-1.2744	-1.30788	-3.64644					0.339508	0.296687	-0.0380927
	50.101	0.000402472	0.000394356	0.000506285					-1.28489	-1.29423	-3.64698					0.333324	0.28926	-0.0417443
	50.187	0.000401768	0.00039289	0.00050764					-1.29124	-1.2894	-3.6676					0.329685	0.281804	-0.0443582
	50.277	0.000401697	0.000389894	0.000508833					-1.29937	-1.28052	-3.67127					0.325076	0.276622	-0.0470081
	50.367	0.0004001	0.000389313	0.00050928					-1.30868	-1.26961	-3.6545					0.319884	0.273851	-0.0495983
	50.427	0.000399354	0.000388061	0.000509418					-1.31487	-1.26338	-3.65487					0.316541	0.271351	-0.0513384
	50.547	0.000397829	0.000384545	0.000509146					-1.32819	-1.25037	-3.65109					0.309518	0.267719	-0.0547798
	50.667	0.000394955	0.000383487	0.000507753					-1.34219	-1.23776	-3.66626					0.302395	0.263914	-0.058201
	50.787	0.000391929	0.000382216	0.000505722					-1.35767	-1.22496	-3.65335					0.294768	0.26354	-0.0615483
	50.907	0.000388924	0.000378687	0.00050326					-1.3739	-1.21396	-3.63725					0.287096	0.264574	-0.0648563
	50.997	0.000386387	0.000376787	0.000501144					-1.38636	-1.20764	-3.62529					0.281442	0.266042	-0.0673131
	51.086	0.00038382	0.000374913	0.000498973					-1.39876	-1.20328	-3.61461					0.276008	0.267883	-0.0697232
	51.146	0.000382095	0.000373649	0.000497515					-1.40701	-1.19857	-3.60725					0.272239	0.268863	-0.0713403
	51.266	0.00037865	0.000371017	0.000494672					-1.42353	-1.19793	-3.58942					0.265441	0.272313	-0.0745367
	51.356	0.000376264	0.000369194	0.000492757					-1.43552	-1.20088	-3.57775					0.260771	0.274909	-0.0769065
	51.506	0.000373603	0.000366725	0.000490453					-1.4543	-1.21267	-3.5604					0.253945	0.278824	-0.0807995
	51.596	0.000372003	0.000365261	0.000489223					-1.46462	-1.22438	-3.55259					0.250526	0.280607	-0.0830991
	51.712	0.000369739	0.000363809	0.000487829					-1.47537	-1.25466	-3.58062					0.248233	0.279509	-0.0859792
	51.776	0.000368969	0.000363331	0.000487348					-1.48201	-1.26277	-3.55917					0.245953	0.28096	-0.0875875
	51.896	0.000367638	0.000363148	0.000486747					-1.49305	-1.28546	-3.52951					0.242731	0.282291	-0.0905571
	52.016	0.000368103	0.000363605	0.000486846					-1.50018	-1.32484	-3.53728					0.24216	0.278723	-0.0933818
	52.076	0.000369509	0.000363779	0.00048713					-1.5049	-1.33888	-3.51646					0.240979	0.279021	-0.0948374
	52.196	0.000371254	0.000365289	0.000487847					-1.5087	-1.38555	-3.52044					0.242051	0.272702	-0.0975139
	52.285	0.000372238	0.000367457	0.000488776					-1.51124	-1.41963	-3.51411					0.242882	0.268204	-0.0994781
	52.376	0.000375237	0.000368916	0.000489773					-1.51117	-1.45917	-3.51521					0.245061	0.261112	-0.101356
	52.555	0.000380269	0.000373905	0.000492578					-1.51157	-1.53464	-3.51511					0.249122	0.248088	-0.10504
	52.645	0.000382706	0.000377352	0.000494498					-1.5121	-1.57341	-3.52594					0.251215	0.24146	-0.106894
	52.735	0.000385945	0.000379536	0.000495702					-1.51048	-1.61276	-3.54361					0.254272	0.233276	-0.108623
	52.825	0.000388862	0.000381969	0.000496864					-1.50852	-1.65121	-3.57003					0.257552	0.224887	-0.110312
	52.945	0.000392347	0.000386917	0.000499196					-1.50516	-1.6997	-3.618					0.262303	0.21351	-0.112487
	52.975	0.000393246	0.000387881	0.000499545					-1.50416	-1.71089	-3.6314					0.26355	0.210704	-0.113012
	53.125	0.000397217	0.000391642	0.000500067					-1.49983	-1.76929	-3.72779					0.269878	0.196185	-0.115676
	53.219	0.00039931	0.000393817	0.000499759					-1.49627	-1.78937	-3.76789					0.27361	0.189844	-0.117178
	53.275	0.000400819	0.00039526	0.000499566					-1.49461	-1.80481	-3.80536					0.275862	0.185532	-0.11812
	53.395	0.000402587	0.000397136	0.000497566					-1.49039	-1.84653	-3.90633					0.281341	0.173986	-0.120168
	53.485	0.000403294	0.000398353	0.000495316					-1.48751	-1.86479	-3.96227					0.284831	0.168248	-0.121639
	53.605	0.000404447	0.000399561	0.000491752					-1.48514	-1.87432	-4.01846					0.288355	0.164722	-0.123608
	53.725	0.000405737	0.000399849	0.000487509					-1.48243	-1.88243	-4.06526					0.291864	0.16153	-0.125588
	53.845	0.00040554	0.000400349	0.000482643					-1.47922	-1.8859	-4.08985					0.295218	0.159357	-0.127549
	53.935	0.000406309	0.000399556	0.000479049					-1.47932	-1.87115	-4.08815					0.296095	0.163192	-0.129096
	54.025	0.000406247	0.000399186	0.000475537					-1.47726	-1.8629	-4.0744					0.297845	0.164572	-0.130575
	54.115	0.000406051	0.000398762	0.000472345					-1.47802	-1.83721	-4.04717					0.29785	0.171641	-0.132166
	54.205	0.00040511	0.000399011	0.00046968					-1.47774	-1.81227	-4.00799					0.298118	0.178146	-0.133722
	54.355	0.000405239	0.000397596	0.000466293					-1.47777	-1.7595	-3.92279					0.297694	0.192172	-0.136349
	54.445	0.000404292	0.000397795	0.00046535					-1.47798	-1.72204	-3.86385					0.296993	0.202201	-0.137941
	54.565	0.000404497	0.000396784	0.000464559					-1.47882	-1.6618	-3.78258					0.295166	0.218578	-0.140121
	54.689	0.000404638	0.000396184	0.00046466					-1.47898	-1.60546	-3.70132					0.293884	0.233465	-0.142275
	54.745	0.000403905	0.000396423	0.000465432					-1.47917	-1.57102	-3.6674					0.292509	0.242777	-0.143312
	54.806	0.000403742	0.000396375	0.000466033					-1.47939	-1.53634	-3.6338					0.291239	0.252077	-0.144411
	54.896	0.000403714	0.000396478	0.000466874					-1.47954	-1.48339	-3.59105					0.289181	0.266235	-0.146033
	55.016	0.000403129	0.000396867	0.00046846					-1.47801	-1.41059	-3.5469					0.28627	0.285296	-0.148175
	55.136	0.000402181	0.000396511	0.00047014					-1.4782	-1.33835	-3.52206					0.283074	0.304686	-0.150339
	55.256	0.000401456	0.000397335	0.000470931					-1.47787	-1.26537	-3.51338					0.279641	0.324295	-0.152516
	55.406	0.000400023	0.000398161	0.000471169					-1.46906	-1.18749	-3.51577					0.276577	0.343465	-0.155022
	55.466	0.000399315	0.000398469	0.000470961					-1.4659	-1.1577	-3.52247					0.275297	0.351	-0.156037
	55.526	0.000398039	0.0004003	0.000470678					-1.46466	-1.12437	-3.53018					0.273617	0.359987	-0.157118
	55.616	0.000396795	0.000400271	0.000469782					-1.45648	-1.08956	-3.54532					0.272386	0.36816	-0.158542
	55.766	0.000394165	0.000400991	0.000467562					-1.44598	-1.02627	-3.56519					0.269639	0.384277	-0.161049
	55.882	0.000391572	0.000402088	0.000465425					-1.43381	-0.989783	-3.5766					0.268418	0.392923	-0.162869
	55.946	0.000389549	0.000403274	0.00046417					-1.42565	-0.974854	-3.58149					0.268103	0.39616	-0.163828
	56.066	0.00038682	0.000403963	0.000461588					-1.40903	-0.95133	-3.58317					0.267839	0.400965	-0.165593
	56.16	0.000384195	0.000404851	0.000459563					-1.39569	-0.931137	-3.57141					0.267642	0.40512	-0.166984
	56.276	0.000381064	0.00040566	0.000457154					-1.37482	-0.927656	-3.57011					0.268731	0.404118	-0.168524
	56.366	0.000378704	0.000406088	0.000455475					-1.35838	-0.923972	-3.56211					0.269627	0.403479	-0.169716
	56.517	0.00037363	0.000406981	0.000452767					-1.32886	-0.925248	-3.55179					0.271751	0.400027	-0.171635
	56.607	0.000370828	0.000407028	0.00045142					-1.31029	-0.929831	-3.55049					0.273347	0.396706	-0.172732
	56.667	0.000369466	0.000406759	0.000451061					-1.2976	-0.934507	-3.55323					0.274536	0.393977	-0.173443
	56.757	0.000366826	0.000406306	0.000450192					-1.27822	-0.942812	-3.56244					0.276454	0.389371	-0.174484
	56.907	0.000363028	0.000404643	0.00044997					-1.24559	-0.961932	-3.59894					0.279985	0.380116	-0.176163
	56.967	0.000361632	0.000403697	0.000450159					-1.23262	-0.970101	-3.61957					0.281441	0.376201	-0.176821
	57.117	0.000358594	0.000400682	0.000451134					-1.20262	-0.988546	-3.68322					0.284895	0.367178	-0.178485
	57.207	0.000356944	0.000398205	0.000452879					-1.18373	-0.999977	-3.72709					0.28704	0.361276	-0.179441
	57.297	0.000355598	0.000395493	0.000454508					-1.16542	-1.01232	-3.77746					0.289152	0.355249	-0.180392
	57.387	0.000354513	0.000392484	0.000456349					-1.14867	-1.02171	-3.82643					0.291062	0.350118	-0.181357
	57.508	0.000353395	0.000387998	0.00045912					-1.1255	-1.04182	-3.90477					0.293803	0.34159	-0.182634
	57.598	0.000352855	0.000384472	0.000461201					-1.11199	-1.04186	-3.93967					0.295215	0.338887	-0.183587
	57.688	0.000352767	0.000380905	0.000463362					-1.09941	-1.03837	-3.9673					0.296458	0.33699	-0.184488
	57.808	0.000352264	0.000376057	0.000465525					-1.08398	-1.02876	-3.99186					0.297879	0.335632	-0.185584
	57.898	0.000352245	0.000372615	0.000466908					-1.07039	-1.03607	-4.02508					0.299393	0.331651	-0.186475
	57.988	0.000352147	0.00036963	0.000467384					-1.05997	-1.02589	-4.02875					0.300295	0.331539	-0.187191
	58.108	0.000352462	0.000365643	0.000468569					-1.04828	-1	-4.01024					0.301106	0.334132	-0.187843
	58.229	0.000352619	0.000362573	0.000468498					-1.03656	-0.97406	-3.98446					0.301992	0.33692	-0.18831
	58.289	0.000352675	0.000361313	0.000468259					-1.03106	-0.958967	-3.96721					0.302404	0.338836	-0.188415
	58.409	0.000352656	0.000359092	0.00046756					-1.01975	-0.929593	-3.93128					0.303331	0.342611	-0.188602
	58.499	0.000352592	0.000358728	0.000466158					-1.01257	-0.897099	-3.89567					0.303916	0.347723	-0.18803
	58.619	0.000352337	0.000358443	0.000464414					-1.0019	-0.85795	-3.85457					0.304903	0.353711	-0.187495
	58.739	0.00035168	0.000358427	0.000462319					-0.991435	-0.812604	-3.81708					0.306075	0.36111	-0.186123
	58.83	0.000351441	0.000359442	0.000461005					-0.982639	-0.778298	-3.79943					0.307434	0.366921	-0.184155
	58.916	0.000350918	0.000360265	0.00045961					-0.973917	-0.745973	-3.78615					0.308785	0.37236	-0.182355
	59.01	0.000350618	0.000361452	0.00045868					-0.964299	-0.70903	-3.77448					0.310286	0.378602	-0.180317
	59.1	0.000349639	0.000362396	0.0004571					-0.952351	-0.680036	-3.78088					0.312809	0.383732	-0.176832
	59.22	0.000349048	0.000363662	0.00045633					-0.934367	-0.644058	-3.79492					0.316817	0.39021	-0.171474
	59.34	0.000347448	0.00036492	0.000455098					-0.917426	-0.602349	-3.80224					0.320427	0.397635	-0.166509
	59.461	0.000346601	0.0003656	0.000455215					-0.896085	-0.56821	-3.81616					0.325473	0.404024	-0.159803
	59.551	0.000346404	0.000365562	0.000455633					-0.877975	-0.545646	-3.82429					0.329883	0.40841	-0.154051
	59.615	0.000345769	0.000365656	0.000456164					-0.866889	-0.5255	-3.82493					0.332476	0.412176	-0.150461
	59.735	0.000345966	0.000364746	0.000456874					-0.836351	-0.502838	-3.82709					0.340105	0.417038	-0.140834
	59.851	0.000345799	0.000363771	0.000458171					-0.799095	-0.48705	-3.8215					0.349404	0.420944	-0.129533
	59.942	0.000345362	0.000362814	0.000460241					-0.767853	-0.474062	-3.8116					0.357093	0.424147	-0.120223
	60.032	0.000345831	0.000361503	0.000461236					-0.734718	-0.461697	-3.7992					0.365177	0.427265	-0.110505
	60.122	0.000346114	0.000359948	0.000463021					-0.697691	-0.45056	-3.78631					0.374114	0.430225	-0.0999305
	60.242	0.000346976	0.000357935	0.000464759					-0.647362	-0.43597	-3.77093					0.386198	0.43411	-0.0856456
	60.332	0.000347647	0.000356287	0.000466279					-0.600696	-0.425956	-3.76448					0.397137	0.436913	-0.0731559
	60.453	0.000348468	0.000354284	0.000468546					-0.525782	-0.408868	-3.76564					0.414145	0.441197	-0.0542861
	60.543	0.000349344	0.000352544	0.000469741					-0.473611	-0.398076	-3.77216					0.4261	0.444031	-0.0409605
	60.663	0.000350189	0.0003507	0.000471747					-0.383035	-0.373484	-3.79168					0.445832	0.449294	-0.0199342
	60.753	0.000350336	0.000349563	0.000473874					-0.312622	-0.354268	-3.8108					0.461057	0.45331	-0.00397369
	60.844	0.000351037	0.000348491	0.000474924					-0.249319	-0.344373	-3.8377					0.475295	0.455898	0.0111785
	60.934	0.000351093	0.000347691	0.000476782					-0.16077	-0.314058	-3.85725					0.49364	0.461556	0.0292957
	61.054	0.000350616	0.000346885	0.00047976					-0.0391214	-0.274536	-3.87803					0.518886	0.469001	0.0534464
	61.144	0.000349941	0.000346484	0.000482248					0.0605208	-0.240693	-3.88353					0.539383	0.47528	0.0721282
	61.265	0.000348284	0.00034604	0.000486361					0.219557	-0.179236	-3.85421					0.571492	0.486335	0.0986689
	61.415	0.000345824	0.000345933	0.000491803					0.442205	-0.0930751	-3.76993					0.616507	0.501832	0.132363
	61.505	0.000341752	0.000344454	0.000498043					0.571539	-0.0468681	-3.72166					0.643012	0.510319	0.152349
	61.595	0.000339447	0.000344245	0.000502246					0.711599	0.00511989	-3.6542					0.671614	0.519806	0.172826
	61.656	0.000337247	0.000343718	0.000505848					0.84318	0.0569985	-3.55586					0.698296	0.529029	0.187518
	61.746	0.000333467	0.000342563	0.000511812					1.04965	0.134676	-3.39984					0.740581	0.542968	0.209109
	61.866	0.000328647	0.000341101	0.000519609					1.31427	0.232843	-3.20904					0.795031	0.560792	0.237683
	61.986	0.000321741	0.000337672	0.000529843					1.61317	0.344432	-2.98335					0.856714	0.581084	0.266687
	62.11	0.000315054	0.000333892	0.000539955					2.04318	0.49808	-2.66577					0.946956	0.609524	0.296982
	62.197	0.000309209	0.000329524	0.000547956					2.3581	0.613717	-2.45226					1.01334	0.631189	0.318187
	62.287	0.00030462	0.000326148	0.000555071					2.724	0.750364	-2.22488					1.09104	0.657191	0.340061
	62.347	0.000301781	0.000324023	0.000559924					3.07773	0.884192	-2.04465					1.16777	0.683848	0.354256
	62.468	0.000294875	0.000317491	0.000570133					3.5804	1.08615	-1.77144					1.27458	0.722704	0.38368
	62.588	0.000288362	0.000309847	0.00057945					4.28941	1.3892	-1.4797					1.42866	0.784095	0.411909
	62.678	0.000284161	0.000303773	0.000585762					4.72321	1.57577	-1.28405					1.52144	0.820709	0.433688
	62.799	0.000278748	0.000295807	0.000594429					5.52011	1.95562	-1.02199					1.69566	0.899195	0.461666
	62.919	0.000273857	0.000287731	0.000602518					6.46713	2.47803	-0.797465					1.90529	1.01014	0.488145
	62.949	0.000272843	0.000285698	0.000604361					6.76742	2.67195	-0.757044					1.97273	1.0523	0.494207
	63.069	0.000270808	0.000277803	0.000610619					7.82988	3.36206	-0.578034					2.20999	1.20118	0.519437
	63.163	0.0002698	0.000272187	0.000615573					8.60874	3.86325	-0.418353					2.38323	1.30873	0.539625
	63.28	0.000269705	0.000266028	0.000621613					9.58428	4.48822	-0.195617					2.60023	1.44291	0.564732
	63.431	0.000271781	0.000259726	0.00062932					11.1874	5.77175	-0.0113271					2.96316	1.72466	0.593192
	63.551	0.000275271	0.000256285	0.000635551					12.441	6.78372	0.177051					3.24699	1.94696	0.61581
	63.641	0.000277049	0.000253918	0.000640873					13.4771	7.71677	0.287434					3.48347	2.15339	0.631318
	63.701	0.000281862	0.000254183	0.000643641					14.1869	8.38203	0.357472					3.64598	2.30092	0.641266
	63.822	0.000291643	0.000255942	0.000649645					15.6984	9.94477	0.455747					3.99447	2.64917	0.659379
	63.942	0.000298879	0.000257182	0.000656796					17.2246	11.6489	0.5322					4.34875	3.03057	0.675681
	64.033	0.000306923	0.000260237	0.000661709					18.3466	12.8213	0.623237					4.60834	3.29263	0.688867
	64.093	0.000312639	0.000262783	0.000664875					19.1501	13.9395	0.601417					4.79881	3.54549	0.694189
	64.213	0.000328005	0.000271716	0.000669875					20.6674	15.684	0.664603					5.15319	3.93783	0.709212
	64.303	0.000336234	0.000275922	0.000674612					21.8273	17.0527	0.684162					5.42501	4.2463	0.719742
	64.424	0.000349702	0.000283844	0.000679788					23.3908	19.1093	0.64444					5.7955	4.71286	0.731085
	64.57	0.000373284	0.000301668	0.000682777					25.1782	21.7766	0.527976					6.22633	5.32443	0.740449
	64.635	0.000382671	0.00030852	0.00068414					26.0389	22.8483	0.48098					6.42945	5.56739	0.746799
	64.785	0.000406367	0.000326959	0.000685682					27.7588	25.5554	0.307197					6.84893	6.194	0.753723
	64.815	0.000412936	0.000333288	0.000685168					28.1526	26.0912	0.267138					6.94273	6.31619	0.756033
	64.875	0.000421484	0.000339296	0.000685634					28.7559	27.1469	0.189754					7.09328	6.56405	0.757267
	65.026	0.000447305	0.000360519	0.000684266					30.4634	29.8664	-0.0379605					7.51098	7.19551	0.763104
	65.146	0.000468005	0.000376884	0.000682336					31.4023	31.7144	-0.18722					7.75465	7.64031	0.762279
	65.297	0.000495833	0.000400593	0.000678019					32.4962	33.8717	-0.369972					8.04095	8.16351	0.760734
	65.361	0.000507709	0.000411078	0.000675667					33.0475	34.8956	-0.455604					8.18136	8.40732	0.760856
	65.417	0.000517687	0.000422229	0.000672358					33.4035	35.6387	-0.515771					8.27652	8.58951	0.759792
	65.542	0.000539838	0.000441998	0.000666769					34.3455	37.5391	-0.651721					8.52178	9.04663	0.758406
	65.688	0.000567053	0.000464575	0.000660347					34.9368	39.0775	-0.751606					8.69543	9.43847	0.752669
	65.779	0.000583087	0.000479596	0.000655243					35.1704	39.8446	-0.796876					8.77319	9.64158	0.748164
	65.839	0.000591952	0.000489718	0.000651153					35.133	40.0361	-0.816339					8.7808	9.70769	0.744082
	65.929	0.000608144	0.000504661	0.000646051					35.217	40.5747	-0.844767					8.82394	9.86034	0.738786
	66.05	0.000621386	0.000524316	0.000637297					35.4015	41.4723	-0.874034					8.89904	10.1038	0.731825
	66.14	0.000636348	0.000539543	0.000632019					35.0986	41.3852	-0.879952					8.85271	10.1193	0.724519
	66.321	0.00066255	0.000570694	0.000621113					34.3143	40.9771	-0.876616					8.71706	10.0957	0.709181
	66.411	0.000677841	0.000587948	0.000615897					33.7234	40.4644	-0.865102					8.60118	10.0128	0.700816
	66.472	0.000679567	0.000596197	0.000612795					33.4669	40.3687	-0.868201					8.5574	10.014	0.695614
	66.592	0.000690795	0.000615968	0.000607231					32.6217	39.6282	-0.859962					8.38901	9.8899	0.684177
	66.652	0.000698468	0.000627403	0.000604549					32.2382	39.3207	-0.865091					8.31469	9.84303	0.678521
	66.803	0.000704857	0.000648146	0.000600345					30.7594	37.7787	-0.844103					8.0008	9.54305	0.662718
	66.893	0.000711282	0.000662786	0.000598113					29.8257	36.7974	-0.83626					7.80052	9.34877	0.653093
	66.984	0.000711599	0.000672145	0.00059729					28.8153	35.7192	-0.828589					7.58131	9.13113	0.643139
	67.074	0.000712917	0.000682214	0.000596581					27.6851	34.5138	-0.81592					7.33053	8.87867	0.632941
	67.164	0.000710193	0.000687445	0.000596836					26.639	33.3843	-0.814439					7.10178	8.64793	0.622884
	67.289	0.000707666	0.000695732	0.000596836					25.0486	31.6589	-0.807187					6.74834	8.28622	0.608517
	67.375	0.000705138	0.00070038	0.000596739					23.8596	30.3934	-0.803362					6.47989	8.01383	0.598358
	67.526	0.000699199	0.000706899	0.000595877					21.632	28.1207	-0.816027					5.96951	7.51155	0.580038
	67.616	0.00069273	0.000706223	0.00059538					20.2476	26.7829	-0.841626					5.64849	7.20841	0.568847
	67.677	0.000687951	0.000705196	0.00059477					19.3452	25.8302	-0.841249					5.44216	6.99866	0.561408
	67.797	0.000678015	0.00070287	0.000592666					17.5056	23.9214	-0.841951					5.01878	6.57291	0.546597
	67.918	0.000663517	0.000691227	0.000591325					15.5687	22.1333	-0.888075					4.56451	6.15663	0.531091
	68.012	0.00065144	0.000680411	0.000590028					14.0606	20.8013	-0.92996					4.20862	5.8409	0.518814
	68.099	0.000640552	0.000671559	0.000588188					12.6645	19.5272	-0.953016					3.88011	5.54125	0.507494
	68.159	0.000633826	0.000668421	0.00058595					11.718	18.7754	-0.9846					3.65389	5.3551	0.499308
	68.28	0.000616795	0.000652996	0.000583321					9.77696	17.0202	-1.00401					3.19602	4.93919	0.483401
	68.37	0.000603526	0.000640375	0.000581521					8.34276	15.7747	-1.02075					2.8559	4.63902	0.471357
	68.49	0.000585417	0.00062193	0.000579644					6.42408	14.1209	-1.04099					2.40024	4.23891	0.455274
	68.611	0.00056708	0.000603882	0.000577633					4.51008	12.5289	-1.06643					1.94367	3.84765	0.438813
	68.705	0.000552361	0.000589843	0.000576178					3.04282	11.3374	-1.09086					1.59261	3.55141	0.425871
	68.792	0.000539023	0.000576456	0.000575041					1.76669	10.2958	-1.11679					1.28625	3.28821	0.413452
	68.943	0.000517306	0.000554056	0.00057251					-0.429234	8.4867	-1.18272					0.758859	2.8313	0.391872
	69.063	0.000499318	0.000535984	0.000571011					-2.06977	7.06553	-1.26018					0.364372	2.47159	0.374305
	69.154	0.000486901	0.000523116	0.000569178					-3.30263	5.9953	-1.33354					0.0676293	2.20051	0.36097
	69.218	0.000480416	0.000515863	0.000565943					-4.15287	5.2459	-1.39269					-0.137167	2.01069	0.351539
	69.334	0.000463635	0.000498575	0.000564866					-5.63157	3.87883	-1.51612					-0.493479	1.66574	0.334269
	69.398	0.00045609	0.000490357	0.000562822					-6.47764	3.15192	-1.58733					-0.69773	1.48041	0.324821
	69.515	0.000443808	0.000476454	0.000557768					-7.86136	1.75385	-1.73392					-1.03144	1.13069	0.307146
	69.636	0.000431169	0.000461776	0.000553073					-9.22339	0.293085	-1.88963					-1.36014	0.767843	0.28876
	69.727	0.000422555	0.000451254	0.000549055					-10.135	-0.850051	-2.00542					-1.58018	0.489101	0.274787
	69.847	0.000411506	0.000437215	0.000544204					-11.3406	-2.3352	-2.14691					-1.87145	0.126125	0.256397
	69.911	0.000405128	0.000428956	0.00054254					-11.9984	-3.11652	-2.21661					-2.03037	-0.0658243	0.246588
	70.028	0.000396932	0.000417039	0.000536379					-13.0304	-4.60142	-2.32833					-2.27976	-0.422964	0.22856
	70.122	0.000390101	0.000406835	0.000532395					-13.7278	-5.80998	-2.39994					-2.44852	-0.708774	0.21409
	70.269	0.000379526	0.000390096	0.000526916					-14.7976	-7.67	-2.48779					-2.70722	-1.1492	0.191514
	70.394	0.000372197	0.000377266	0.000521819					-15.5873	-9.22928	-2.54087					-2.89833	-1.5154	0.172414
	70.484	0.000368142	0.000369511	0.000518346					-16.0249	-10.3002	-2.56924					-3.0047	-1.76423	0.158846
	70.571	0.000363744	0.000360888	0.000515227					-16.4659	-11.3241	-2.59645					-3.11159	-2.00343	0.145731
	70.665	0.000359508	0.000351952	0.000511892					-16.9406	-12.4294	-2.62648					-3.22644	-2.26196	0.131557
	70.722	0.000357212	0.000346741	0.000509909					-17.1598	-13.0551	-2.64573					-3.27977	-2.40749	0.123099
	70.816	0.000353275	0.000337598	0.00050586					-17.4206	-13.9966	-2.68238					-3.3438	-2.62621	0.109398
	70.933	0.000349756	0.000327756	0.000501356					-17.8681	-15.2868	-2.7405					-3.45235	-2.92676	0.092028
	71.084	0.000346709	0.000316032	0.000495634					-18.1261	-16.6388	-2.83775					-3.51679	-3.24184	0.0704754
	71.178	0.00034558	0.000309111	0.000491872					-18.257	-17.4621	-2.91452					-3.54989	-3.43356	0.0571341
	71.295	0.000344927	0.000300936	0.000486751					-18.1834	-18.1697	-3.00993					-3.53513	-3.60221	0.0413845
	71.385	0.0003459	0.000294313	0.000483688					-18.0444	-18.5932	-3.08322					-3.5043	-3.70592	0.0296324
	71.506	0.00034719	0.000286246	0.00047782					-17.8357	-19.1488	-3.18557					-3.45793	-3.84223	0.0139447
	71.536	0.000347473	0.000284517	0.000476125					-17.7684	-19.2658	-3.20981					-3.44278	-3.87153	0.0101252
	71.661	0.000349992	0.000276782	0.00046959					-17.4375	-19.6917	-3.30435					-3.36799	-3.9801	-0.00553939
	71.782	0.000353647	0.000269039	0.000463229					-17.0515	-20.0313	-3.38195					-3.28043	-4.06888	-0.0203925
	71.902	0.00035677	0.000263382	0.000456237					-16.4632	-20.0479	-3.42681					-3.14539	-4.08924	-0.0339205
	71.989	0.000359764	0.000258813	0.000451448					-16.0855	-20.1657	-3.45354					-3.05921	-4.12527	-0.0440572
	72.053	0.000361313	0.000257111	0.000447923					-15.7279	-20.1272	-3.46296					-2.97715	-4.12545	-0.0509877
	72.17	0.000366156	0.000250386	0.00044189					-15.0191	-19.9877	-3.468					-2.81444	-4.11058	-0.0632395
	72.294	0.000370886	0.000244224	0.000435786					-14.1339	-19.6625	-3.46204					-2.61133	-4.05632	-0.0750922
	72.415	0.000375175	0.000238597	0.000430269					-13.2965	-19.3865	-3.44354					-2.41938	-4.0112	-0.0868349
	72.502	0.000377233	0.000235294	0.000426532					-12.6748	-19.1438	-3.42571					-2.2766	-3.96943	-0.0951438
	72.566	0.000379407	0.000232439	0.00042409					-12.0754	-18.804	-3.41925					-2.14025	-3.90237	-0.0996837
	72.687	0.000382156	0.000227945	0.000419955					-11.0774	-18.2899	-3.39732					-1.91241	-3.80402	-0.109568
	72.777	0.000383754	0.000224836	0.000417382					-10.3121	-17.8633	-3.38245					-1.738	-3.72052	-0.11647
	72.898	0.000385243	0.000221116	0.000414696					-9.27415	-17.2497	-3.36337					-1.50206	-3.59797	-0.125171
	73.015	0.000386022	0.000218129	0.000413052					-8.29422	-16.6354	-3.33981					-1.2808	-3.47168	-0.132804
	73.075	0.000386393	0.000216511	0.000412555					-7.78318	-16.2915	-3.34718					-1.16381	-3.40435	-0.137374
	73.166	0.000386583	0.000214707	0.00041238					-7.05609	-15.7885	-3.33271					-1.00064	-3.29925	-0.142939
	73.287	0.000386898	0.000212037	0.000413064					-6.16562	-15.1109	-3.3126					-0.802858	-3.15537	-0.149949
	73.411	0.000386518	0.000211749	0.0004151					-5.5762	-14.4771	-3.26511					-0.681705	-3.01088	-0.155914
	73.532	0.000385823	0.000215086	0.000418245					-4.85942	-13.7735	-3.2493					-0.527785	-2.85887	-0.162442
	73.619	0.000385689	0.00021749	0.000420951					-4.61356	-13.3162	-3.22169					-0.484472	-2.75344	-0.16644
	73.709	0.000385706	0.000220717	0.000424082					-4.7271	-12.8818	-3.19059					-0.529857	-2.64709	-0.170136
	73.83	0.000385867	0.000230464	0.00042883					-4.93215	-12.274	-3.15845					-0.602077	-2.50091	-0.175246
	73.921	0.000386425	0.000237017	0.000432399					-5.24668	-11.8283	-3.13385					-0.694576	-2.39195	-0.178953
	74.041	0.00038757	0.000242668	0.00043652					-6.4258	-11.2835	-3.11485					-0.998641	-2.25029	-0.183429
	74.102	0.000388389	0.000248181	0.000438552					-7.22578	-11.014	-3.10919					-1.19996	-2.1786	-0.185638
	74.196	0.000390214	0.000259112	0.000441517					-8.93179	-10.6098	-3.1124					-1.62034	-2.06773	-0.18893
	74.283	0.000392308	0.000267972	0.000443334					-11.6488	-10.2414	-3.14706					-2.27302	-1.96112	-0.191838
	74.434	0.000400461	0.00029648	0.000447644					-15.8128	-9.61613	-3.17432					-3.27221	-1.78277	-0.196954
	74.559	0.00040999	0.000318174	0.000449248					-21.0652	-9.10334	-3.23282					-4.51275	-1.62959	-0.201054
	74.585	0.000412568	0.000323099	0.000449506					-22.9492	-8.98684	-3.26092					-4.95138	-1.59369	-0.201918
	74.77	0.000437397	0.000359867	0.000450242					-34.3293	-8.21388	-3.37977					-7.60175	-1.35689	-0.208041
	74.857	0.000451276	0.000376646	0.000449516					-39.196	-7.87056	-3.41757					-8.73675	-1.25039	-0.210851
	74.948	0.000465643	0.000393852	0.000448048					-46.0026	-7.49838	-3.47149					-10.3111	-1.13393	-0.213893
	75.042	0.000488761	0.000413628	0.000447038					-52.9216	-7.12294	-3.52067					-11.9119	-1.01538	-0.216999
	75.163	0.000522937	0.000438556	0.000445362					-64.1767	-6.64083	-3.58821					-14.4982	-0.86199	-0.22122
	75.22	0.000542784	0.000450184	0.000444608					-69.7622	-6.42015	-3.61758					-15.7794	-0.791188	-0.223237
	75.314	0.000571662	0.000469519	0.000443573					-80.6825	-6.08027	-3.65973					-18.2705	-0.680659	-0.226787
	75.431	0.000623113	0.000492678	0.00044268					-94.9894	-5.69739	-3.70237					-21.5254	-0.553551	-0.231324
	75.612	0.000734325	0.00052356	0.000441224					-116.973	-5.13698	-3.7722					-26.526	-0.365277	-0.238353
	75.646	0.000768164	0.000526836	0.000440276					-121.511	-5.04728	-3.78325					-27.5545	-0.334146	-0.239741
	75.767	0.000852379	0.000545186	0.00044018					-137.063	-4.70224	-3.8401					-31.0869	-0.216473	-0.244587
	75.888	0.000935141	0.000564133	0.000441538					-154.221	-4.44851	-3.88377					-34.9648	-0.124182	-0.249739
	75.975	0.0010068	0.00057494	0.000442152					-166.447	-4.25006	-3.93184					-37.7322	-0.0536807	-0.253425
	76.069	0.00107739	0.000588359	0.000444097					-180.589	-4.14406	-3.96119					-40.9153	-0.00819266	-0.257646
	76.19	0.00118807	0.000599719	0.000445133					-198.999	-4.10125	-3.9935					-45.0504	0.0228898	-0.263216
	76.247	0.00125901	0.000598172	0.000443637					-207.684	-4.11479	-4.00846					-46.9992	0.0274592	-0.265878
	76.341	0.00133917	0.000607216	0.000445325					-221.52	-4.43029	-4.00093					-50.0848	-0.0490906	-0.270488
	76.462	0.00145321	0.000613214	0.000446165					-239.446	-4.69823	-4.03089					-54.1025	-0.107487	-0.276271
	76.579	0.00156336	0.000616703	0.000446635					-256.734	-5.1052	-4.04976					-57.9721	-0.20445	-0.281953
	76.704	0.00167581	0.000623253	0.000447424					-274.073	-6.00402	-4.04883					-61.8429	-0.433306	-0.288183
	76.794	0.00176063	0.000618785	0.000446662					-284.197	-7.435	-4.04215					-64.0981	-0.802978	-0.292792
	76.912	0.00186156	0.000611582	0.000446028					-300.775	-8.50166	-4.02388					-67.7981	-1.06951	-0.298708
	77.002	0.00193073	0.00060501	0.000445825					-311.033	-10.1838	-4.00505					-70.0841	-1.49369	-0.303319
	77.067	0.00198896	0.000607262	0.000445373					-317.928	-11.6677	-3.98899					-71.6207	-1.8646	-0.306662
	77.157	0.00204921	0.000598473	0.000445317					-325.376	-14.6575	-3.97487					-73.283	-2.60369	-0.311312
	77.274	0.00212063	0.000587792	0.000445434					-335.164	-18.772	-3.94134					-75.4661	-3.61076	-0.317356
	77.365	0.00217326	0.000580271	0.000445422					-340.362	-23.2007	-3.92441					-76.6299	-4.68218	-0.322056
	77.49	0.00224966	0.00057144	0.000444587					-348.668	-28.8973	-3.88045					-78.4827	-6.05594	-0.328518
	77.641	0.00231642	0.000557691	0.000444049					-354.234	-38.1492	-3.85311					-79.7312	-8.26178	-0.336292
	77.762	0.00237507	0.000547171	0.000442336					-357.644	-46.119	-3.83922					-80.4958	-10.1534	-0.342516
	77.852	0.00241772	0.000538478	0.000440554					-354.602	-55.2834	-3.86476					-79.8318	-12.2928	-0.347054
	77.943	0.00242389	0.000531122	0.00044021					-354.971	-62.427	-3.87494					-79.918	-13.9733	-0.351705
	78.034	0.00244274	0.000523745	0.000438595					-352.452	-71.2195	-3.90581					-79.3655	-16.0234	-0.356305
	78.121	0.00243474	0.00052032	0.000437552					-350.221	-79.3564	-3.94048					-78.8749	-17.9239	-0.360713
	78.211	0.00244524	0.000514878	0.000435283					-345.362	-89.2612	-3.99167					-77.8039	-20.2176	-0.365221
	78.306	0.00242813	0.000514621	0.000433241					-337.906	-101.036	-4.05694					-76.1578	-22.9225	-0.369931
	78.363	0.00244538	0.000509025	0.000431256					-333.775	-107.76	-4.09646					-75.2457	-24.471	-0.372768
	78.544	0.00245839	0.000498117	0.000426008					-316.245	-131.273	-4.23001					-71.3668	-29.8412	-0.381687
	78.608	0.00244639	0.000498085	0.000424516					-310.503	-139.134	-4.2769					-70.0977	-31.6458	-0.384857
	78.726	0.00238688	0.000509251	0.00042224					-298.188	-154.434	-4.36241					-67.374	-35.1436	-0.390666
	78.85	0.00235079	0.000512933	0.000420362					-282.744	-171.42	-4.44008					-63.9502	-38.9991	-0.396725
	78.941	0.00231769	0.000517015	0.000419616					-270.623	-183.922	-4.48704					-61.2591	-41.8294	-0.401162
	79.028	0.00227931	0.000522471	0.000419428					-258.57	-195.753	-4.52278					-58.5799	-44.5029	-0.405398
	79.092	0.00225733	0.000523373	0.000419751					-249.158	-203.936	-4.53164					-56.4783	-46.3399	-0.408508
	79.213	0.00218767	0.000534107	0.000420878					-231.826	-219.498	-4.55747					-52.6166	-49.851	-0.414401
	79.334	0.00210317	0.000549121	0.000422446					-214.208	-234.064	-4.56394					-48.6819	-53.1316	-0.420298
	79.451	0.00201686	0.000563888	0.000424193					-197.21	-247.029	-4.55708					-44.8788	-56.0497	-0.426011
	79.576	0.00192308	0.000577086	0.000426733					-179.715	-257.768	-4.53004					-40.9484	-58.4655	-0.432164
	79.637	0.00187398	0.00058289	0.000428484					-170.335	-266.047	-4.53411					-38.856	-60.3273	-0.435115
	79.697	0.00182156	0.000589102	0.000430371					-162.926	-267.732	-4.50854					-37.1766	-60.7094	-0.438134
	79.818	0.00171322	0.000604129	0.00043271					-146.038	-277.565	-4.48844					-33.3799	-62.9184	-0.444108
	79.969	0.00157525	0.000622842	0.000434664					-125.065	-288.531	-4.46227					-28.6545	-65.3684	-0.451582
	80.09	0.00146473	0.00063741	0.000435457					-110.883	-289.997	-4.43967					-25.4386	-65.7041	-0.457766
	80.211	0.00136471	0.000650308	0.000435051					-97.8086	-288.816	-4.42611					-22.4682	-65.4497	-0.464061
	80.272	0.00131319	0.000656946	0.000434818					-90.5061	-289.806	-4.4219					-20.8137	-65.6665	-0.467188
	80.363	0.00123736	0.000666924	0.000434249					-81.8469	-286.283	-4.41878					-18.8405	-64.8867	-0.472047
	80.484	0.00113153	0.000682053	0.00043324					-70.4248	-281.501	-4.4174					-16.2375	-63.8209	-0.478541
	80.544	0.0010963	0.0006867	0.000432184					-65.1813	-278.301	-4.41734					-15.0403	-63.1075	-0.481809
	80.665	0.00100228	0.000702103	0.000430194					-54.3785	-272.279	-4.41337					-12.5737	-61.7608	-0.488386
	80.787	0.000927828	0.000715179	0.000427646					-46.2928	-261.297	-4.41379					-10.7151	-59.3126	-0.49533
	80.847	0.000886126	0.000724224	0.000426116					-41.5948	-257.115	-4.40642					-9.63765	-58.3789	-0.498664
	80.968	0.000835215	0.000733783	0.00042342					-34.5903	-244.925	-4.40006					-8.02073	-55.6584	-0.505685
	81.055	0.00080014	0.000741185	0.000421354					-30.949	-234.592	-4.40619					-7.17438	-53.3466	-0.510935
	81.176	0.000761497	0.000748402	0.000418628					-25.127	-221.106	-4.39454					-5.8228	-50.3364	-0.518113
	81.297	0.000727	0.000754792	0.000415766					-21.6715	-205.978	-4.41928					-5.01217	-46.9411	-0.525709
	81.388	0.000704641	0.000758418	0.000413567					-18.4615	-194.826	-4.41805					-4.26042	-44.4506	-0.531286
	81.483	0.000685109	0.000760369	0.0004113					-15.7504	-182.696	-4.42611					-3.62132	-41.7403	-0.537217
	81.539	0.000669215	0.000767462	0.000409092					-14.935	-175.918	-4.45114					-3.42671	-40.21	-0.540929
	81.66	0.000659515	0.000756627	0.000407378					-12.731	-160.775	-4.48714					-2.90154	-36.8114	-0.548807
	81.785	0.000648925	0.000746286	0.000405031					-10.9901	-145.299	-4.53413					-2.48342	-33.3336	-0.557094
	81.906	0.000641823	0.000732595	0.000402829					-9.85311	-131.538	-4.58701					-2.20835	-30.2255	-0.565357
	81.997	0.000638564	0.000719035	0.000401357					-8.93572	-120.257	-4.62961					-1.98586	-27.6887	-0.571489
	82.088	0.000636588	0.000702915	0.000400046					-8.30579	-110.234	-4.67347					-1.83234	-25.4212	-0.577797
	82.175	0.000635704	0.000684571	0.000398935					-7.82006	-101.191	-4.71568					-1.71364	-23.3701	-0.583904
	82.3	0.000634544	0.000660314	0.000397525					-7.20353	-87.8656	-4.78526					-1.56246	-20.3479	-0.59268
	82.387	0.000634434	0.000641647	0.000396787					-6.93318	-80.2309	-4.82661					-1.49592	-18.6039	-0.598946
	82.538	0.000635368	0.000608178	0.000396456					-6.59244	-68.9496	-4.8915					-1.41208	-16.0143	-0.609966
	82.66	0.000635607	0.000583432	0.000395561					-6.37597	-60.7828	-4.94417					-1.35911	-14.132	-0.618918
	82.724	0.000635647	0.000572057	0.000395142					-6.28389	-57.0912	-4.97045					-1.33684	-13.2769	-0.623641
	82.815	0.000634878	0.000560588	0.000394191					-6.15282	-51.5225	-5.01002					-1.30518	-11.9841	-0.630338
	82.936	0.000635261	0.000542515	0.000393988					-6.02143	-46.1676	-5.05741					-1.27442	-10.7292	-0.639316
	82.996	0.000634925	0.000536602	0.000393689					-5.9747	-44.5737	-5.08067					-1.26396	-10.352	-0.64378
	83.118	0.000633411	0.000529833	0.000393043					-5.85864	-40.1292	-5.12873					-1.23735	-9.29854	-0.652829
	83.239	0.000630996	0.00052869	0.000392555					-5.77609	-37.7046	-5.17845					-1.21933	-8.71539	-0.661764
	83.329	0.000627347	0.000536677	0.000392651					-5.70829	-35.6403	-5.21278					-1.20424	-8.2153	-0.668422
	83.42	0.000624152	0.000542258	0.000392827					-5.64848	-34.1256	-5.24687					-1.19116	-7.84252	-0.67514
	83.511	0.00062152	0.000544897	0.000392637					-5.60662	-33.5716	-5.28589					-1.18279	-7.69888	-0.681728
	83.602	0.000615657	0.000560648	0.000394015					-5.56443	-33.0582	-5.32275					-1.1743	-7.56285	-0.688302
	83.723	0.000608492	0.00057672	0.000395436					-5.51938	-32.963	-5.37478					-1.16596	-7.52149	-0.696832
	83.844	0.000600199	0.000594633	0.000397226					-5.47545	-32.9733	-5.42329					-1.1579	-7.50489	-0.705307
	83.966	0.00059063	0.00061427	0.000399309					-5.43619	-33.2532	-5.47113					-1.15111	-7.55305	-0.713698
	84.087	0.00058135	0.000630778	0.00040092					-5.40174	-33.7754	-5.51831					-1.1456	-7.65928	-0.721832
	84.147	0.000575179	0.000642841	0.000401872					-5.38591	-34.1076	-5.54172					-1.14323	-7.72934	-0.725789
	84.269	0.000564182	0.000661503	0.00040273					-5.35541	-34.8933	-5.58926					-1.13889	-7.89796	-0.733691
	84.36	0.000555804	0.000675206	0.000402664					-5.33375	-35.5753	-5.6252					-1.136	-8.04621	-0.739423
	84.45	0.000547802	0.000687571	0.000402611					-5.31295	-36.2141	-5.65913					-1.13327	-8.18696	-0.74518
	84.541	0.000539215	0.000702231	0.000400456					-5.29243	-37.03	-5.69596					-1.13076	-8.3666	-0.750629
	84.632	0.000531146	0.000717303	0.000397257					-5.27157	-37.956	-5.73122					-1.1282	-8.57071	-0.755752
	84.753	0.000520794	0.000736275	0.00039411					-5.24463	-39.1776	-5.77593					-1.12497	-8.84205	-0.762553
	84.844	0.000513388	0.000752478	0.000390683					-5.22466	-40.1537	-5.80762					-1.1226	-9.05939	-0.767481
	84.962	0.000504331	0.000775909	0.000385837					-5.20002	-41.444	-5.85384					-1.11989	-9.34712	-0.773868
	85.083	0.000495293	0.000802425	0.000381034					-5.1747	-42.8694	-5.88752					-1.11695	-9.66494	-0.77992
	85.178	0.000490025	0.000828616	0.000377151					-5.15597	-44.0085	-5.89536					-1.11472	-9.91988	-0.784311
	85.269	0.00048458	0.000854349	0.000374234					-5.13909	-45.1013	-5.91812					-1.11298	-10.163	-0.788747
	85.359	0.0004797	0.000882309	0.000371915					-5.12307	-46.2007	-5.9342					-1.11133	-10.4069	-0.792993
	85.481	0.000475479	0.00092604	0.000370515					-5.10678	-47.6032	-5.92415					-1.10992	-10.7207	-0.798286
	85.541	0.000470468	0.000945265	0.000368942					-5.10211	-48.2378	-5.9137					-1.10985	-10.8632	-0.800807
	85.662	0.000464733	0.000992287	0.000368222					-5.09031	-49.5923	-5.90769					-1.10937	-11.1633	-0.80608
	85.753	0.000463526	0.00103066	0.000369696					-5.09476	-50.3667	-5.88685					-1.1115	-11.3379	-0.809782
	85.875	0.00046131	0.00108246	0.00037201					-5.08749	-51.6632	-5.87602					-1.11186	-11.6229	-0.814993
	85.966	0.000460212	0.00112113	0.000374306					-5.0925	-52.4399	-5.86129					-1.11411	-11.7948	-0.818737
	86.087	0.000460164	0.00117064	0.000378115					-5.10684	-53.3381	-5.84252					-1.11861	-11.9933	-0.823674
	86.239	0.0004599	0.00123193	0.000383023					-5.13513	-54.2807	-5.82145					-1.12628	-12.2009	-0.829838
	86.329	0.000463859	0.00125796	0.000386696					-5.16727	-54.5848	-5.81422					-1.13393	-12.267	-0.83353
	86.451	0.000467832	0.00129312	0.00039102					-5.20164	-55.1158	-5.80007					-1.14237	-12.384	-0.838465
	86.508	0.000472351	0.00130084	0.000393162					-5.22329	-55.2681	-5.79514					-1.14745	-12.4174	-0.840796
	86.599	0.000478184	0.0013149	0.00039616					-5.26725	-55.3488	-5.79145					-1.15748	-12.4339	-0.8446
	86.693	0.000482309	0.0013333	0.000398823					-5.31462	-55.3775	-5.78739					-1.16821	-12.4393	-0.848548
	86.815	0.000489171	0.00134964	0.000401889					-5.39511	-55.0447	-5.79344					-1.18601	-12.3617	-0.853931
	86.936	0.000499478	0.00135092	0.000404504					-5.47529	-54.6382	-5.79717					-1.20367	-12.2694	-0.859316
	87.027	0.000508168	0.00134644	0.000406053					-5.54097	-54.1841	-5.80224					-1.21804	-12.1667	-0.863478
	87.087	0.000512779	0.00134685	0.000406637					-5.58012	-53.9744	-5.80003					-1.22667	-12.1205	-0.866141
	87.209	0.000528701	0.00132046	0.000408132					-5.67954	-53.0392	-5.81231					-1.24824	-11.9091	-0.871984
	87.33	0.000541998	0.00130235	0.000408282					-5.78493	-51.8588	-5.82918					-1.27102	-11.6421	-0.877991
	87.421	0.000553676	0.00127893	0.000408261					-5.86792	-50.8025	-5.84537					-1.28891	-11.4029	-0.882654
	87.482	0.000560729	0.00126846	0.000407688					-5.92928	-49.6958	-5.86563					-1.30201	-11.1524	-0.88613
	87.603	0.000575998	0.00123482	0.000406708					-6.04029	-48.2545	-5.88776					-1.32599	-10.8257	-0.892368
	87.72	0.000590448	0.00120736	0.000405053					-6.15197	-46.1947	-5.92401					-1.34996	-10.3595	-0.899002
	87.815	0.000601474	0.00118043	0.000403543					-6.24314	-44.5803	-5.95553					-1.36958	-9.99288	-0.904349
	87.967	0.000619481	0.00114488	0.000401034					-6.37861	-41.4206	-6.01624					-1.39872	-9.27734	-0.913499
	88.028	0.000624887	0.00112693	0.000399685					-6.43705	-40.2627	-6.0433					-1.41129	-9.01339	-0.917066
	88.119	0.000635335	0.00110812	0.000398525					-6.5141	-38.2658	-6.08528					-1.42789	-8.55999	-0.922697
	88.244	0.000647171	0.00107974	0.000396865					-6.61179	-35.4057	-6.14453					-1.44897	-7.91026	-0.930622
	88.331	0.000652426	0.00105707	0.00039509					-6.67534	-33.3745	-6.18616					-1.46269	-7.44835	-0.93623
	88.452	0.000660615	0.00102965	0.000393887					-6.76376	-30.5349	-6.2456					-1.48174	-6.80175	-0.944069
	88.574	0.000669687	0.00100449	0.000394496					-6.83301	-27.5503	-6.29852					-1.49671	-6.12304	-0.952282
	88.604	0.000669346	0.000995213	0.000393445					-6.8389	-26.7951	-6.30803					-1.49805	-5.95155	-0.954434
	88.756	0.00067757	0.000960042	0.000394908					-6.9017	-23.1053	-6.36667					-1.51164	-5.11226	-0.964932
	88.816	0.000677861	0.000942857	0.00039411					-6.91137	-21.6864	-6.38682					-1.51378	-4.78929	-0.969216
	88.907	0.000682332	0.000919297	0.000395945					-6.93465	-19.5354	-6.41897					-1.51882	-4.30009	-0.975615
	89.029	0.000683574	0.00088258	0.000395623					-6.96391	-16.6333	-6.46021					-1.52513	-3.64128	-0.984213
	89.12	0.000686829	0.000853584	0.000397084					-6.96786	-14.5538	-6.48975					-1.526	-3.16892	-0.990735
	89.241	0.000688803	0.000811856	0.000397047					-6.96011	-11.878	-6.5294					-1.52431	-2.56115	-0.999433
	89.363	0.000690866	0.000766464	0.000396259					-6.93799	-9.29949	-6.57025					-1.51949	-1.9752	-1.0082
	89.484	0.00069296	0.000719065	0.000394346					-6.90296	-6.86754	-6.61093					-1.51182	-1.42206	-1.01685
	89.575	0.000694341	0.000686415	0.000392337					-6.86844	-5.13489	-6.64096					-1.50426	-1.02735	-1.0233
	89.696	0.000697275	0.000634183	0.000388342					-6.80648	-3.1222	-6.67878					-1.4906	-0.566275	-1.03167
	89.757	0.000698761	0.000613335	0.000386548					-6.7824	-1.93044	-6.69647					-1.48536	-0.295266	-1.03598
	89.848	0.000701016	0.000573261	0.000382171					-6.73183	-0.478631	-6.72062					-1.4742	0.0377653	-1.04216
	89.97	0.00070432	0.000527047	0.000376692					-6.65858	1.33243	-6.74867					-1.45802	0.454537	-1.05029
	90.061	0.00070688	0.000494301	0.000372527					-6.593	2.272	-6.76087					-1.44329	0.673765	-1.05583
	90.152	0.000710083	0.00046727	0.000369484					-6.53825	3.67117	-6.78119					-1.43131	0.996282	-1.06194
	90.269	0.000712842	0.000427668	0.000364188					-6.45695	5.01025	-6.79894					-1.41323	1.30848	-1.06922
	90.364	0.000715063	0.000399994	0.000360897					-6.38791	5.78955	-6.8055					-1.39766	1.49183	-1.07456
	90.486	0.000716878	0.000367083	0.000357167					-6.30022	6.93922	-6.82196					-1.37808	1.76243	-1.08176
	90.576	0.000719172	0.000349046	0.000356624					-6.2347	7.6009	-6.83054					-1.36333	1.91941	-1.0867
	90.698	0.000720361	0.000325011	0.000355787					-6.14438	8.40618	-6.844					-1.34294	2.11198	-1.09331
	90.759	0.000720481	0.00031425	0.000355671					-6.10515	8.60374	-6.84217					-1.33394	2.1586	-1.0958
	90.91	0.000719115	0.000291198	0.000355608					-5.99753	9.30816	-6.85686					-1.3095	2.32843	-1.10313
	91.002	0.000718395	0.000280199	0.000357368					-5.9398	9.59289	-6.8663					-1.29634	2.39625	-1.10683
	91.093	0.000716928	0.000270734	0.000359414					-5.88134	9.87045	-6.88017					-1.28303	2.46298	-1.11056
	91.184	0.000714508	0.00026248	0.000360817					-5.82072	10.1319	-6.89505					-1.26922	2.5263	-1.11436
	91.275	0.000711538	0.000255466	0.000361573					-5.76702	10.3399	-6.91755					-1.25699	2.57567	-1.11767
	91.396	0.000707408	0.00024791	0.000363926					-5.69897	10.5865	-6.95591					-1.2415	2.63359	-1.12179
	91.518	0.000702789	0.000241976	0.000366193					-5.63582	10.8038	-7.00496					-1.22714	2.68391	-1.12559
	91.609	0.000699644	0.000238016	0.000367707					-5.58861	10.9588	-7.04057					-1.21638	2.71948	-1.12838
	91.7	0.00069479	0.000236552	0.000369578					-5.54802	11.0946	-7.08473					-1.20718	2.75015	-1.1308
	91.791	0.000692533	0.000232773	0.000371422					-5.51119	11.2198	-7.13121					-1.19887	2.77823	-1.13302
	91.882	0.000687308	0.000233044	0.000372536					-5.48132	11.3261	-7.18343					-1.19223	2.80199	-1.13491
	92.004	0.000683242	0.000230887	0.000374876					-5.44099	11.4696	-7.2404					-1.18322	2.83399	-1.13744
	92.125	0.000676233	0.000233431	0.000375263					-5.40616	11.5993	-7.2901					-1.17549	2.86285	-1.13971
	92.277	0.000663644	0.000242965	0.000372442					-5.36989	11.7414	-7.34234					-1.16758	2.89455	-1.14225
	92.311	0.000660867	0.000245219	0.000371711					-5.36288	11.7696	-7.35233					-1.16607	2.90089	-1.14277
	92.398	0.000653873	0.000250984	0.000369786					-5.34595	11.8392	-7.3754					-1.16246	2.91653	-1.14406
	92.554	0.000641717	0.000261065	0.000366305					-5.32214	11.9347	-7.40573					-1.15759	2.93864	-1.1461
	92.646	0.000634703	0.000266816	0.000364284					-5.30796	11.9989	-7.42671					-1.15468	2.95306	-1.14733
	92.733	0.000628113	0.000272148	0.000362403					-5.29755	12.0416	-7.44119					-1.15267	2.96317	-1.14834
	92.824	0.000621207	0.000277653	0.000360463					-5.28711	12.0869	-7.46178					-1.15069	2.97378	-1.14939
	92.945	0.000611959	0.000284915	0.000357922					-5.27734	12.111	-7.46347					-1.14902	2.98091	-1.15054
	93.006	0.000607228	0.000288583	0.00035665					-5.27362	12.112	-7.45308					-1.14844	2.98232	-1.15104
	93.128	0.000597612	0.000295973	0.000354118					-5.26649	12.1123	-7.43241					-1.14733	2.98475	-1.15202
	93.219	0.000590245	0.000301588	0.000352219					-5.26128	12.1118	-7.41862					-1.14652	2.98641	-1.15273
	93.31	0.000582747	0.000307292	0.00035031					-5.25611	12.1108	-7.40609					-1.14571	2.98797	-1.15344
	93.432	0.000572381	0.000315175	0.000347696					-5.24926	12.1086	-7.39016					-1.14466	2.98992	-1.15438
	93.492	0.000567161	0.000319159	0.000346382					-5.24592	12.107	-7.38225					-1.14414	2.9908	-1.15484
	93.614	0.000556298	0.000327496	0.000343634					-5.23918	12.1031	-7.36521					-1.1431	2.99243	-1.15578
	93.739	0.00054482	0.000336415	0.000340691					-5.23233	12.0977	-7.34556					-1.14205	2.99386	-1.15673
	93.827	0.000536433	0.000343005	0.000338501					-5.22758	12.0931	-7.33008					-1.14132	2.99473	-1.15739
	93.918	0.000527612	0.00035003	0.000336156					-5.2228	12.0879	-7.31266					-1.1406	2.9955	-1.15807
	94.039	0.000515632	0.000359717	0.00033289					-5.21644	12.0798	-7.28657					-1.13963	2.99635	-1.15898
	94.161	0.000503062	0.000370053	0.000329361					-5.21017	12.0707	-7.25727					-1.13867	2.99699	-1.15988
	94.252	0.000493732	0.00037788	0.000326668					-5.20564	12.0634	-7.23356					-1.13799	2.99737	-1.16056
	94.313	0.000487068	0.000383498	0.000324713					-5.20267	12.0583	-7.21682					-1.13754	2.99756	-1.16101
	94.434	0.000474142	0.000394612	0.00032083					-5.19687	12.0476	-7.18157					-1.13667	2.99782	-1.16189
	94.556	0.000460652	0.0004064	0.000316667					-5.19086	12.0356	-7.14235					-1.13576	2.99788	-1.16277
	94.617	0.000453952	0.000412341	0.000314553					-5.18796	12.0294	-7.12207					-1.13533	2.99783	-1.1632
	94.773	0.000435994	0.000428479	0.000308791					-5.18065	12.013	-7.06691					-1.13423	2.99763	-1.16433
	94.803	0.000432881	0.00043135	0.000307758					-5.17926	12.0097	-7.05586					-1.13402	2.99757	-1.16455
	94.955	0.000414943	0.000447845	0.000301807					-5.1725	11.9929	-6.9988					-1.13302	2.99714	-1.16562
	95.046	0.000404323	0.000457777	0.000298199					-5.16862	11.9828	-6.96338					-1.13245	2.99685	-1.16627
Inflection Temperatures (ratio)
Capillary label		Ti [°C]	Ratio @ Ti
KIF13A		67.0514	0.000712586
		78.345	0.00243995
		90.743	0.00072045
Affected NONHSAT002007		67.6072	0.000706289
		81.4943	0.000761794
		86.9537	0.00135005
Unaffected NONHSAT002007		64.8136	0.000685192
